# Supplementary material for: Energy-Starved Inflammation in Autism: Failure of Glycolytic Compensation Under IL-10–Driven Metabolic Tolerance
Source: Research Square preprint supplement (doi:10.21203/rs.3.rs-8390063/v1), 2025-12-24
Supplement: Supplementary file 1 [file 54be2d827d927285deb9fc39.xlsx]

## Sheet: Healthy_vs_Low_Module
Module	Mean logCPM (Healthy)	Mean logCPM (Low SOFA)	Delta	p_raw	p_adj	Signif
Acute_Inflammation	2.63993	3.09726	0.457329	2.29713e-09	7.35081e-09	***
FAO	3.97338	4.17892	0.205545	6.61478e-06	1.17596e-05	***
Glycolysis	6.54684	7.28718	0.740341	1.96947e-18	3.15115e-17	***
HIF1A	4.5444	4.69273	0.148332	0.0319491	0.0319491	*
IFNγ	5.52654	6.16584	0.639302	5.48517e-07	1.25375e-06	***
IL10	3.12171	3.76808	0.646369	5.70471e-12	3.04251e-11	***
IL4_Th2	3.5402	3.72831	0.188105	0.000146755	0.000195673	***
IL6_STAT3	6.57866	6.99994	0.421284	8.27347e-07	1.65469e-06	***
OXPHOS	5.06862	5.59172	0.523094	8.98252e-10	3.59301e-09	***
PDH	4.32329	4.05431	-0.268975	1.40955e-07	3.7588e-07	***
PSA	2.93502	2.79772	-0.137304	0.00151878	0.00173575	**
TCA	5.12885	5.29654	0.167683	3.01183e-05	4.38084e-05	***
TNFA_NFKB	5.94778	6.25336	0.305583	1.5478e-05	2.47649e-05	***
cSLP	2.95481	3.10732	0.152508	0.000338457	0.000416563	***
mSLP	4.111	3.94204	-0.168957	0.00790701	0.00843414	**
Tau_index	-1.30503	0.0403554	1.34539	5.93336e-16	4.74669e-15	***

## Sheet: Healthy_vs_Low_Gene
ENSG	Mean_g1	Mean_g2	Delta	p_raw_wilcox	Cliff	logFC	T_value	p_raw_limma	p_adj_limma	GeneSymbol	Modules	Enzyme	Category	Signif
ENSG00000163220	10.5106	13.1937	2.68309	1.02321e-21	0.910062	2.68309	12.8753	4.36483e-30	6.98372e-28	S100A9	Acute_Inflammation	S100 calcium-binding protein A9 (calprotectin subunit)	Same as S100A8 – extremely high in sepsis plasma	***
ENSG00000143546	8.04657	11.193	3.14646	1.08682e-20	0.886558	3.14646	12.3468	3.12221e-28	2.49777e-26	S100A8	Acute_Inflammation	S100 calcium-binding protein A8 (calprotectin subunit)	Best blood marker of bacterial inflammation – ↑↑↑↑ in sepsis, normal in ASD	***
ENSG00000117118	5.00464	5.81577	0.811134	1.86992e-19	0.85742	0.811134	11.123	4.98256e-24	2.65737e-22	SDHB	TCA	Succinate dehydrogenase iron-sulfur subunit B	Complex II + TCA	***
ENSG00000111640	9.16302	10.6163	1.4533	1.23914e-19	0.861694	1.4533	10.6875	1.42876e-22	5.71505e-21	GAPDH	Glycolysis	Glyceraldehyde-3-phosphate dehydrogenase	6. GAP → 1,3-Bisphosphoglycerate (NAD⁺ → NADH)	***
ENSG00000160883	6.03479	8.23342	2.19863	1.58393e-18	0.834887	2.19863	10.5877	3.06146e-22	9.79667e-21	HK3	cSLP	Hexokinase 3	Minor in most tissues	***
ENSG00000107485	5.12398	3.59257	-1.53142	3.11834e-20	-0.875874	-1.53142	-10.2681	3.43971e-21	9.17257e-20	GATA3	IL4_Th2	GATA binding protein 3	Master regulator of Th2 differentiation – frequently ↑ in ASD peripheral blood	***
ENSG00000102144	8.2727	9.30674	1.03404	1.02573e-20	0.887141	1.03404	9.90685	5.09281e-20	1.16407e-18	PGK1	Glycolysis	Phosphoglycerate kinase 1	7. 1,3-BPG → 3-PG (substrate-level phosphorylation)	***
ENSG00000134333	7.24337	8.44834	1.20498	2.97824e-22	0.922106	1.20498	9.87874	6.26937e-20	1.25387e-18	LDHA	cSLP	Lactate dehydrogenase A (M subunit)	Regenerates NAD⁺ in cytoplasm – critical for glycolysis	***
ENSG00000138413	5.09276	5.97277	0.880015	2.8794e-18	0.828477	0.880015	9.82028	9.65212e-20	1.71593e-18	IDH1	TCA	Isocitrate dehydrogenase 1 (cytosolic/NADP⁺)	Mainly NADPH production (minor TCA role in brain)	***
ENSG00000163541	4.93312	5.57283	0.639709	3.33908e-17	0.801671	0.639709	9.46625	1.28258e-18	2.05213e-17	SUCLG1	TCA	Succinate-CoA ligase (GDP/ADP-forming) α subunit	Substrate-level phosphorylation (succinyl-CoA → succinate + GTP/ATP)	***
ENSG00000111674	4.55789	3.37	-1.18789	6.96039e-19	-0.843629	-1.18789	-8.96336	4.65904e-17	6.77679e-16	ENO2	cSLP	Enolase 2 (neuron-specific, gamma)	Brain-specific enolase	***
ENSG00000169021	4.13796	4.83083	0.692868	4.97017e-14	0.716006	0.692868	8.78353	1.64188e-16	2.18918e-15	UQCRFS1	OXPHOS	Ubiquinol-cytochrome c reductase Rieske iron-sulfur	Complex III Rieske protein – often ↓	***
ENSG00000140374	4.97618	5.55233	0.576151	6.1688e-15	0.741453	0.576151	8.20932	8.33125e-15	1.02538e-13	ETFA	FAO	Electron Transfer Flavoprotein	Electron Transfer Flavoprotein	***
ENSG00000111669	6.85916	7.7139	0.85474	8.05981e-14	0.709984	0.85474	8.16917	1.09015e-14	1.24589e-13	TPI1	Glycolysis	Triosephosphate isomerase	5. DHAP ↔ Glyceraldehyde-3-P	***
ENSG00000110955	7.72062	8.41357	0.692955	7.02131e-15	0.739899	0.692955	8.12316	1.48207e-14	1.58087e-13	ATP5F1B	OXPHOS	ATP synthase F1 subunit beta	Complex V catalytic core – strongly ↓ in almost every ASD cohort	***
ENSG00000138029	6.43174	6.87866	0.446924	1.7222e-15	0.756605	0.446924	8.09349	1.80581e-14	1.80581e-13	HADHB	FAO	Trifunctional Enzyme Subunit Beta	Trifunctional Protein	***
ENSG00000184557	4.82764	6.99266	2.16502	8.80083e-15	0.737179	2.16502	7.99468	3.47543e-14	3.27099e-13	SOCS3	IL6_STAT3	Suppressor of cytokine signalling 3	Classic negative-feedback gene – ↑↑↑↑ in sepsis, low in ASD	***
ENSG00000159128	7.51399	8.50438	0.99039	6.48216e-14	0.712704	0.99039	7.83354	1.00054e-13	8.89372e-13	IFNGR2	IFNγ	Interferon-γ receptor 2	Chain-2 – induced by IFN-γ	***
ENSG00000162434	9.18497	8.56229	-0.622681	3.4598e-13	-0.691531	-0.622681	-7.69467	2.46263e-13	2.01819e-12	JAK1	IFNγ	Janus kinase 1	Main signalling kinase – constitutive	***
ENSG00000171314	5.39904	6.11737	0.718334	2.92828e-13	0.693667	0.718334	7.69093	2.52274e-13	2.01819e-12	PGAM1	Glycolysis	Phosphoglycerate mutase 1	8. 3-Phosphoglycerate → 2-Phosphoglycerate	***
ENSG00000167863	5.03783	5.75687	0.719039	1.70777e-12	0.670746	0.719039	7.67533	2.78951e-13	2.12534e-12	ATP5PD	OXPHOS	ATP synthase peripheral stalk subunit D (ATP5H)	Complex V stator – frequently ↓	***
ENSG00000158864	5.74739	6.29173	0.544342	5.86277e-13	0.684732	0.544342	7.46181	1.09024e-12	7.92903e-12	NDUFS2	OXPHOS	NADH:ubiquinone oxidoreductase iron-sulfur protein 2	Complex I core – pathogenic variants common in mitochondrial ASD	***
ENSG00000067225	8.60337	9.34882	0.745454	3.90479e-13	0.689977	0.745454	7.44123	1.24171e-12	8.27807e-12	PKM	Glycolysis	Pyruvate kinase M1/M2	10. PEP → Pyruvate (final rate-limiting step)	***
ENSG00000105639	7.52346	8.63085	1.10739	2.26067e-13	0.69697	1.10739	7.44652	1.20088e-12	8.27807e-12	JAK3	IL4_Th2	Janus kinase 3	Lymphocyte-specific – strongly associated with IL-4 pathway	***
ENSG00000059804	8.17188	9.51653	1.34465	4.14791e-13	0.6892	1.34465	7.40316	1.57861e-12	1.00651e-11	SLC2A3	Glycolysis	Glucose transporter 3 (GLUT3)	Glucose uptake	***
ENSG00000074800	8.29378	9.03911	0.745337	1.86511e-12	0.66958	0.745337	7.39153	1.69849e-12	1.00651e-11	ENO1	Glycolysis	Enolase 1	9. 2-Phosphoglycerate → Phosphoenolpyruvate	***
ENSG00000234745	11.7089	12.6298	0.920895	1.32932e-12	0.674048	0.920895	7.39401	1.6722e-12	1.00651e-11	HLA-B	IFNγ	Major histocompatibility complex, class I, B	MHC-I induction – ↑ in active IFN-γ states	***
ENSG00000140740	6.02008	6.41904	0.398961	7.47702e-11	0.618881	0.398961	7.1783	6.41275e-12	3.66443e-11	UQCRC2	OXPHOS	Ubiquinol-cytochrome c reductase core protein 2	Complex III core – frequently reduced	***
ENSG00000178537	4.50372	5.02547	0.521754	6.8903e-11	0.620047	0.521754	7.14617	7.81656e-12	4.31259e-11	SLC25A20	FAO	Carnitine/acylcarnitine translocase	Carnitine Shuttle	***
ENSG00000162645	8.43827	9.50686	1.06859	2.64955e-12	0.664918	1.06859	7.0536	1.3783e-11	7.11381e-11	GBP2	IFNγ	Guanylate-binding protein 2	Same family	***
ENSG00000176171	3.27245	2.4657	-0.806755	1.61452e-13	-0.701243	-0.806755	-7.05518	1.36511e-11	7.11381e-11	BNIP3	HIF1A	BCL2/adenovirus E1B 19kDa interacting protein 3	Mitophagy & cell-death mediator under chronic hypoxia; ↑ in some ASD subgroups	***
ENSG00000170525	5.71952	7.43057	1.71105	4.15517e-12	0.658897	1.71105	6.84191	4.95017e-11	2.47509e-10	PFKFB3	HIF1A	6-phosphofructo-2-kinase/fructose-2,6-biphosphatase 3	Key glycolytic driver – brain isoform; highly sensitive to HIF activation but variable in ASD	***
ENSG00000185338	0.845496	2.59656	1.75106	8.00305e-11	0.61791	1.75106	6.54816	2.79289e-10	1.35413e-09	SOCS1	IL4_Th2	Suppressor of cytokine signalling 1	Negative feedback – ↑ in chronic IL-4/Th2 states	***
ENSG00000010256	5.22524	6.01032	0.785076	2.63878e-10	0.600622	0.785076	6.51325	3.41872e-10	1.596e-09	UQCRC1	OXPHOS	Ubiquinol-cytochrome c reductase core protein 1	Complex III core – often ↓ in ASD	***
ENSG00000172840	3.33804	2.52081	-0.81723	1.24904e-11	-0.643939	-0.81723	-6.50961	3.49125e-10	1.596e-09	PDP2	PDH	Pyruvate dehydrogenase phosphatase catalytic subunit 2	Cytosolic, Ca²⁺-insensitive isoform – minor role in brain, usually unchanged	***
ENSG00000131143	6.68153	7.28496	0.603426	3.21779e-09	0.562743	0.603426	6.4688	4.41746e-10	1.96331e-09	COX4I1	OXPHOS	Cytochrome c oxidase subunit 4I1	Complex IV (most abundant isoform) – frequently ↓ in ASD	***
ENSG00000027697	7.53777	8.51313	0.975358	2.8955e-11	0.632284	0.975358	6.31691	1.05076e-09	4.42427e-09	IFNGR1	IFNγ	Interferon-γ receptor 1	Chain-1 of receptor – constitutive expression	***
ENSG00000067992	4.35695	5.0957	0.738747	9.33509e-10	0.581779	0.738747	6.31776	1.04571e-09	4.42427e-09	PDK3	PDH	Pyruvate dehydrogenase kinase isoform 3	Brain-enriched – frequently ↑ in ASD (together with PDK1)	***
ENSG00000172340	4.92932	4.28369	-0.645631	2.07847e-10	-0.604118	-0.645631	-6.27373	1.34075e-09	5.50051e-09	SUCLG2	TCA	Succinate-CoA ligase (GDP/ADP-forming) β subunit	Determines GDP vs ADP specificity	***
ENSG00000069399	5.19291	6.50409	1.31118	1.76379e-09	0.572067	1.31118	6.02753	5.25907e-09	2.10363e-08	BCL3	IL10	B-cell lymphoma 3-encoded protein	IL-10 → stabilises repressive p50/p50 NF-κB homodimers → blocks pro-inflammatory genes	***
ENSG00000179091	3.95274	4.76941	0.816668	5.08216e-09	0.555556	0.816668	5.99453	6.29736e-09	2.45751e-08	CYC1	OXPHOS	Cytochrome c1	Complex III – heme protein, ↓ in many cohorts	***
ENSG00000090339	5.22614	6.2045	0.978361	3.51563e-11	0.629565	0.978361	5.94773	8.12133e-09	3.09384e-08	ICAM1	Acute_Inflammation	Intercellular adhesion molecule 1	Endothelial activation & leukocyte adhesion – ↑↑↑ in sepsis, low in ASD	***
ENSG00000138796	3.94779	3.30503	-0.642759	2.06672e-12	-0.668221	-0.642759	-5.9177	9.55333e-09	3.47394e-08	HADH	FAO	Hydroxyacyl-CoA Dehydrogenase	Hydroxyacyl-CoA Dehydrogenase	***
ENSG00000243646	2.59566	3.40081	0.805154	3.3457e-10	0.597125	0.805154	5.92085	9.39262e-09	3.47394e-08	IL10RB	IL10	IL-10 receptor β (shared with IL-22/26/28)	Constitutive	***
ENSG00000067182	8.04051	8.93409	0.893574	1.10756e-10	0.613248	0.893574	5.71294	2.84582e-08	1.01185e-07	TNFRSF1A	TNFA_NFKB	TNF receptor superfamily member 1A (TNFR1)	Main signalling receptor – normal in ASD, strongly ↑ in sepsis	***
ENSG00000150768	4.24409	3.59646	-0.647632	2.32611e-09	-0.567793	-0.647632	-5.67466	3.47904e-08	1.2101e-07	DLAT	PDH	Dihydrolipoamide S-acetyltransferase (E2)	Core lipoamide swinging arm – ↓ in many ASD cohorts	***
ENSG00000104365	6.46823	6.19743	-0.270801	1.00812e-09	-0.580614	-0.270801	-5.65114	3.93423e-08	1.33931e-07	IKBKB	TNFA_NFKB	Inhibitor of κB kinase β (IKKβ)	Main kinase that frees NF-κB – massively active in sepsis	***
ENSG00000178741	4.59284	5.17251	0.579669	9.5459e-11	0.615385	0.579669	5.60738	4.94051e-08	1.64684e-07	COX5A	OXPHOS	Cytochrome c oxidase subunit 5A	Complex IV – ↓ in brain ASD studies	***
ENSG00000125347	8.78835	9.62098	0.832626	3.25803e-09	0.562549	0.832626	5.55396	6.51236e-08	2.12649e-07	IRF1	IFNγ	Interferon regulatory factor 1	First-wave transcription factor – classic IFN-γ-induced gene	***
ENSG00000077238	7.3059	8.3404	1.0345	1.52731e-08	0.537879	1.0345	5.3341	1.98812e-07	6.36199e-07	IL4R	IL4_Th2	Interleukin-4 receptor α (shared with IL-13)	Constitutive + induced in Th2-skewed states	***
ENSG00000105379	3.50227	4.05466	0.552395	1.87969e-07	0.495338	0.552395	5.14335	5.09263e-07	1.59769e-06	ETFB	FAO	Electron Transfer Flavoprotein	Electron Transfer Flavoprotein	***
ENSG00000072778	6.42328	6.93432	0.511042	5.97066e-07	0.474553	0.511042	5.11016	5.98241e-07	1.84074e-06	ACADVL	FAO	Very long-chain acyl-CoA dehydrogenase	Long/Very Long-Chain Acyl-CoA Dehydrogenases	***
ENSG00000157184	3.93566	4.27524	0.339583	1.04124e-08	0.544095	0.339583	5.09214	6.52658e-07	1.97029e-06	CPT2	FAO	Carnitine palmitoyltransferase 2	Carnitine Shuttle	***
ENSG00000164951	4.79341	3.83432	-0.959092	3.95357e-08	-0.522145	-0.959092	-5.04441	8.2102e-07	2.43265e-06	PDP1	PDH	Pyruvate dehydrogenase phosphatase catalytic subunit 1	Main mitochondrial activator (Ca²⁺-sensitive) – often ↓ in ASD (less de-repression)	***
ENSG00000137265	4.96442	3.98625	-0.97817	1.411e-10	-0.609751	-0.97817	-4.98443	1.09293e-06	3.17942e-06	IRF4	IL4_Th2	Interferon regulatory factor 4	Co-operates with STAT6 for Th2 programme – frequently ↑ in ASD immune cells	***
ENSG00000136634	-3.1269	-2.38984	0.737054	5.65238e-07	0.4358	0.737054	4.88488	1.74685e-06	4.99101e-06	IL10	IL10	Interleukin-10	Master anti-inflammatory cytokine – chronically ↑ in many ASD children (blood & brain)	***
ENSG00000169429	2.88079	1.15781	-1.72297	1.14585e-07	-0.503885	-1.72297	-4.83559	2.19749e-06	6.16838e-06	CXCL8	Acute_Inflammation	C-X-C motif chemokine ligand 8 (IL-8)	Strongest neutrophil chemoattractant – ↑↑↑↑↑ in sepsis, negligible in ASD	***
ENSG00000168610	8.40776	9.02663	0.618876	3.90806e-08	0.522339	0.618876	4.82388	2.32006e-06	6.40015e-06	STAT3	IL6_STAT3	Signal transducer and activator of transcription 3	Principal transcription factor – massively phosphorylated/activated in sepsis, low in ASD	***
ENSG00000125538	5.63133	6.65933	1.028	6.33483e-09	0.552059	1.028	4.80951	2.47937e-06	6.72372e-06	IL1B	Acute_Inflammation	Interleukin-1β	Master alarm cytokine – ↑↑↑↑ in sepsis, almost undetectable in ASD	***
ENSG00000164919	2.81426	3.64323	0.828966	6.1237e-06	0.429876	0.828966	4.7984	2.60983e-06	6.95954e-06	COX6C	OXPHOS	Cytochrome c oxidase subunit 6C	Complex IV – ubiquitous isoform, often ↓	***
ENSG00000014641	4.99861	5.4533	0.454696	1.53848e-06	0.456876	0.454696	4.79011	2.71138e-06	7.11182e-06	MDH1	TCA	Malate dehydrogenase 1 (cytosolic)	OAA ↔ malate (shuttle function, minor direct TCA)	***
ENSG00000149925	1.60069	2.42326	0.82257	8.90109e-07	0.467172	0.82257	4.62983	5.61672e-06	1.44948e-05	ALDOA	Glycolysis	Fructose-bisphosphate aldolase A	4. Fructose-1,6-BP → DHAP + GAP	***
ENSG00000131473	6.56704	6.27572	-0.291325	1.47682e-06	-0.457653	-0.291325	-4.62241	5.80653e-06	1.47467e-05	ACLY	TCA	ATP-citrate lyase	Citrate (mito → cyto) → acetyl-CoA + OAA (lipids, epigenetics)	***
ENSG00000062485	6.68192	6.40936	-0.27256	1.61904e-06	-0.455905	-0.27256	-4.55514	7.83388e-06	1.95847e-05	CS	TCA	Citrate synthase	TCA entry: acetyl-CoA + OAA → citrate	***
ENSG00000117228	7.02641	8.29171	1.2653	2.02152e-05	0.405206	1.2653	4.42632	1.37687e-05	3.38922e-05	GBP1	IFNγ	Guanylate-binding protein 1	Classic IFN-γ-inducible GTPase – ↑↑↑ in sepsis, very low in ASD	***
ENSG00000172331	5.0669	6.32244	1.25555	3.87205e-06	0.439005	1.25555	4.40042	1.53978e-05	3.7328e-05	BPGM	cSLP	Bisphosphoglycerate mutase (2,3-BPG synthesis)	Modulates GAPDH/PGK step (mainly erythrocytes)	***
ENSG00000091140	5.05198	5.44301	0.391029	3.85539e-07	0.482517	0.391029	4.37845	1.69233e-05	4.04138e-05	DLD	TCA	Dihydrolipoamide dehydrogenase (E3)	Shared E3 for α-KGDH and PDH complexes	***
ENSG00000100906	6.62215	7.31783	0.695678	7.14362e-07	0.471251	0.695678	4.20236	3.56006e-05	8.3766e-05	NFKBIA	TNFA_NFKB	NF-κB inhibitor alpha (IκBα)	Rapidly degraded in sepsis → NF-κB release; stable in ASD	***
ENSG00000084754	7.36572	7.59998	0.234257	3.02328e-06	0.443862	0.234257	4.06773	6.18392e-05	0.000143395	HADHA	FAO	Trifunctional Enzyme Subunit Alpha	Trifunctional Protein	***
ENSG00000073756	5.06562	4.04986	-1.01576	7.55916e-05	-0.376263	-1.01576	-4.05388	6.54012e-05	0.000149489	PTGS2	Acute_Inflammation	Prostaglandin-endoperoxide synthase 2 (COX-2)	Inducible cyclooxygenase – prostaglandin storm in sepsis, low in ASD brain	***
ENSG00000134352	6.97311	6.32378	-0.649336	3.32348e-05	-0.394522	-0.649336	-4.00513	7.95564e-05	0.000179282	IL6ST	IL6_STAT3	Interleukin-6 signal transducer (gp130)	Shared co-receptor – strongly induced in sepsis	***
ENSG00000096968	5.97468	6.6434	0.66872	8.89769e-06	0.4223	0.66872	3.95034	9.89259e-05	0.000219835	JAK2	IFNγ	Janus kinase 2	Secondary kinase – constitutive	***
ENSG00000109107	3.78663	3.32484	-0.461792	1.79422e-05	-0.407731	-0.461792	-3.89938	0.000120893	0.000264972	ALDOC	cSLP	Aldolase C (brain-specific)	Predominant aldolase isoform in adult brain	***
ENSG00000067829	4.8774	5.30751	0.430115	0.00010521	0.368687	0.430115	3.86214	0.000139793	0.000298225	IDH3G	TCA	Isocitrate dehydrogenase 3 (NAD⁺) γ subunit	Main TCA catalytic enzyme	***
ENSG00000162711	4.77295	5.30726	0.534311	7.68858e-07	0.469891	0.534311	3.86464	0.00013844	0.000298225	NLRP3	Acute_Inflammation	NLR family pyrin domain containing 3	Major inflammasome platform – strongly activated in sepsis, mostly quiescent in ASD	***
ENSG00000125166	4.85988	4.42564	-0.43424	7.14362e-07	-0.471251	-0.43424	-3.8437	0.000150153	0.000316111	GOT2	mSLP	Aspartate aminotransferase, mitochondrial	Malate-aspartate shuttle + transamination to feed OAA/α-KG into TCA/mSLP	***
ENSG00000156515	7.05663	7.56428	0.507654	4.31398e-06	0.436869	0.507654	3.81772	0.000165994	0.000344923	HK1	Glycolysis	Hexokinase 1	1. Glucose → Glucose-6-phosphate (rate-limiting)	***
ENSG00000108515	2.33085	1.81606	-0.514792	0.000440678	-0.33411	-0.514792	-3.64231	0.000322083	0.000660684	ENO3	cSLP	Enolase 3 (beta, muscle)	Muscle-specific (low in brain)	***
ENSG00000143252	5.53084	5.77781	0.24697	0.000328012	0.341492	0.24697	3.5402	0.000468348	0.000948552	SDHC	TCA	Succinate dehydrogenase complex subunit C	Complex II anchor	***
ENSG00000135390	5.37659	5.8576	0.48101	0.000282387	0.345183	0.48101	3.5267	0.000491808	0.000983615	ATP5MC2	OXPHOS	ATP synthase membrane subunit c isoform 2	Complex V ring – brain isoform	***
ENSG00000116016	1.86071	2.56213	0.701421	7.88911e-05	0.375291	0.701421	3.52084	0.000502325	0.000992246	EPAS1	HIF1A	Endothelial PAS domain protein 1 (HIF-2α)	HIF-2α – important in neural stem cells & astrocytes; altered in some ASD subgroups	***
ENSG00000111716	7.23173	6.75661	-0.475116	0.000267132	-0.346542	-0.475116	-3.476	0.000590082	0.00115138	LDHB	cSLP	Lactate dehydrogenase B (H subunit)	Minor role in brain	**
ENSG00000148672	6.51261	6.28783	-0.224775	0.000129633	-0.363831	-0.224775	-3.46119	0.000622089	0.00119921	GLUD1	mSLP	Glutamate dehydrogenase 1 (ubiquitous)	Glutamate → α-ketoglutarate + NADH/NADPH – major neuronal anaplerosis & reducing power	**
ENSG00000110324	7.82518	7.55726	-0.267916	0.000231375	-0.350039	-0.267916	-3.41042	0.000744556	0.0014182	IL10RA	IL10	IL-10 receptor α	Constitutive + induced	**
ENSG00000169245	-0.197249	1.12134	1.31859	0.00010883	0.367813	1.31859	3.39075	0.000797803	0.00150175	CXCL10	IFNγ	C-X-C motif chemokine ligand 10 (IP-10)	Same family – one of the best markers of active IFN-γ response	**
ENSG00000105397	7.11117	7.51249	0.401319	0.000229527	0.350233	0.401319	3.37513	0.000842556	0.00156755	TYK2	IL6_STAT3	Tyrosine kinase 2	Minor role in IL-6 signalling – constitutive	**
ENSG00000119689	5.86336	5.72556	-0.137795	0.000549946	-0.328477	-0.137795	-3.33136	0.000980866	0.00180389	DLST	TCA	Dihydrolipoamide S-succinyltransferase (E2)	Part of α-KGDH complex	**
ENSG00000169248	-2.62649	-1.82745	0.799048	0.0038506	0.2635	0.799048	3.28091	0.00116632	0.00212058	CXCL11	IFNγ	C-X-C motif chemokine ligand 11 (I-TAC)	Same CXCR3-ligand family – same pattern	**
ENSG00000129521	1.36993	0.867654	-0.502278	0.000118292	-0.365967	-0.502278	-3.22874	0.00139204	0.00250254	EGLN3	HIF1A	Egl-9 family hypoxia-inducible factor 3 (PHD3)	Brain-enriched prolyl hydroxylase – strongly induced by hypoxia	**
ENSG00000173039	5.99113	6.31959	0.328457	0.000341117	0.340521	0.328457	3.15811	0.00176236	0.00313308	RELA	TNFA_NFKB	RELA proto-oncogene, NF-κB subunit (p65)	Transcriptionally active subunit – strongly ↑ in sepsis, low in ASD	**
ENSG00000136244	-2.05543	-2.54926	-0.493832	0.000177899	-0.32838	-0.493832	-3.12315	0.00197759	0.00347496	IL6	Acute_Inflammation	Interleukin-6	Acute-phase driver, fever, CRP induction – ↑↑↑↑ in sepsis, very low in ASD	**
ENSG00000175198	2.57249	2.18374	-0.388756	0.000437299	-0.334305	-0.388756	-3.12	0.0019981	0.00347496	PCCA	PSA	Propionyl-CoA carboxylase subunit alpha	Ligase	**
ENSG00000152556	2.91601	2.61115	-0.304865	0.00081737	-0.318182	-0.304865	-3.06498	0.00239019	0.00411215	PFKM	cSLP	Phosphofructokinase muscle	Rate-limiting step	**
ENSG00000171503	3.85971	4.05398	0.194262	0.000781945	0.319347	0.194262	3.04299	0.00256581	0.00436734	ETFDH	FAO	Electron Transfer Flavoprotein	Electron Transfer Flavoprotein	**
ENSG00000182054	5.46483	5.89698	0.432149	0.00371642	0.275835	0.432149	2.98076	0.00312903	0.00526995	IDH2	TCA	Isocitrate dehydrogenase 2 (mitochondrial/NADP⁺)	Reductive carboxylation + NADPH (important in ASD mitochondria)	**
ENSG00000115415	8.55069	9.07649	0.525794	0.00345828	0.277972	0.525794	2.90761	0.00393475	0.00655791	STAT1	IFNγ	Signal transducer and activator of transcription 1	Principal transcription factor – strongly phosphorylated/up in active IFN-γ response	**
ENSG00000124370	1.90685	1.51841	-0.388439	0.000184556	-0.355478	-0.388439	-2.8412	0.00482596	0.00796035	MCEE	PSA	Methylmalonyl-CoA epimerase	Isomerase	**
ENSG00000152256	5.26447	4.91262	-0.351851	0.00249529	-0.28749	-0.351851	-2.78087	0.00579065	0.00945412	PDK1	PDH	Pyruvate dehydrogenase kinase isoform 1	Main brain inhibitor – often strongly ↑↑ in ASD (extra braking of PDH)	**
ENSG00000117394	4.73467	5.19526	0.460592	0.0077644	0.253108	0.460592	2.76667	0.00604187	0.00976464	SLC2A1	Glycolysis	Glucose transporter 1 (GLUT1)	Glucose uptake	**
ENSG00000109320	6.67372	6.93657	0.262852	0.00935539	0.247086	0.262852	2.65432	0.00840332	0.0134453	NFKB1	TNFA_NFKB	Nuclear factor NF-κB p105/p50 subunit	Core subunit – mild activation in some ASD, massive in sepsis	*
ENSG00000110090	6.31906	6.5696	0.250543	0.00891915	0.24864	0.250543	2.57689	0.0104838	0.016608	CPT1A	FAO	Carnitine palmitoyltransferase 1A	Carnitine Shuttle	*
ENSG00000105679	-3.08775	-3.19726	-0.109513	0.00778929	-0.120921	-0.109513	-2.49932	0.0130182	0.0204207	GAPDHS	cSLP	Spermatogenic GAPDH (rarely expressed in brain)	Same as GAPDH (usually ignore in brain)	*
ENSG00000159199	2.9715	3.34098	0.36948	0.00805195	0.251943	0.36948	2.40675	0.0167454	0.0260123	ATP5MC1	OXPHOS	ATP synthase membrane subunit c isoform 1	Complex V ring – highly expressed, often ↓	*
ENSG00000163734	-2.54434	-2.15339	0.390947	0.0279485	0.202603	0.390947	2.40077	0.017016	0.0261785	CXCL3	Acute_Inflammation	C-X-C motif chemokine ligand 3 (GRO-γ)	Same family, same pattern	*
ENSG00000146701	5.74464	5.95706	0.212421	0.0099274	0.245144	0.212421	2.35405	0.0192638	0.0293543	MDH2	TCA	Malate dehydrogenase 2 (mitochondrial)	Malate → OAA + NADH (core TCA step)	*
ENSG00000152234	7.59695	7.7807	0.183751	0.0081499	0.251554	0.183751	2.28206	0.0232393	0.0350783	ATP5F1A	OXPHOS	ATP synthase F1 subunit alpha	Complex V catalytic core – almost always ↓ in ASD	*
ENSG00000139180	2.83167	3.0935	0.261827	0.000939611	0.314491	0.261827	2.2541	0.0249665	0.0373331	NDUFA9	OXPHOS	NADH:ubiquinone oxidoreductase subunit A9	Complex I accessory – often ↓ in ASD brain cohorts	*
ENSG00000113520	-2.32217	-2.64309	-0.320916	0.00877864	-0.225136	-0.320916	-2.23283	0.0263539	0.0390428	IL4	IL4 Th2	Interleukin-4	Master Th2 cytokine – ↑ in many ASD children with atopy, GI issues, chronic LPS exposure	*
ENSG00000110435	3.32484	3.09757	-0.227269	0.0191139	-0.222805	-0.227269	-2.20722	0.0281129	0.0412666	PDHX	PDH	Pyruvate dehydrogenase protein X component (E3BP)	Anchors E3 to complex – mutations cause severe PDH deficiency + autistic features	*
ENSG00000105953	6.41777	6.60968	0.191905	0.00935539	0.247086	0.191905	2.1703	0.0308281	0.0448408	OGDH	TCA	Oxoglutarate dehydrogenase (E1)	α-ketoglutarate → succinyl-CoA + NADH	*
ENSG00000122971	2.40626	2.80819	0.401928	0.002396	0.288656	0.401928	2.13428	0.0336917	0.0485646	ACADS	FAO	Short-Chain Acyl-CoA Dehydrogenase	Medium/Short-Chain	*
ENSG00000143437	6.15974	6.02119	-0.138551	0.0292729	-0.207265	-0.138551	-2.05187	0.0411165	0.0587378	ARNT	HIF1A	Aryl hydrocarbon receptor nuclear translocator	HIF-1β – obligatory dimerisation partner
ENSG00000166888	8.68016	8.88247	0.202306	0.0138224	0.234071	0.202306	2.03793	0.0425004	0.0601775	STAT6	IL4_Th2	Signal transducer and activator of transcription 6	Canonical IL-4 transcription factor – phosphorylated/up in Th2 conditions
ENSG00000160712	8.9155	9.19194	0.276434	0.000195345	0.354118	0.276434	2.03029	0.0432757	0.0607379	IL6R	IL6_STAT3	Interleukin-6 receptor α	Membrane-bound receptor – moderate constitutive
ENSG00000166411	4.77969	4.5827	-0.19699	0.00744058	-0.254468	-0.19699	-2.02587	0.0437307	0.0608427	IDH3A	TCA	Isocitrate dehydrogenase 3 (NAD⁺) α subunit	Main TCA catalytic enzyme: isocitrate → α-ketoglutarate + NADH
ENSG00000204370	5.44283	5.58217	0.139344	0.0161894	0.228632	0.139344	1.88669	0.0602402	0.0830899	SDHD	TCA	Succinate dehydrogenase complex subunit D	Complex II anchor
ENSG00000171552	8.10914	8.5632	0.454062	0.145886	0.138306	0.454062	1.79124	0.0743398	0.101661	BCL2L1	IL6_STAT3	BCL2-like 1 (Bcl-xL)	Anti-apoptotic STAT3 target – ↑ in sepsis (cell survival), low in ASD
ENSG00000136872	-3.24598	-3.14727	0.0987148	0.0560986	0.0850816	0.0987148	1.74153	0.0826937	0.112127	ALDOB	cSLP	Aldolase B (liver/kidney)	Low in brain
ENSG00000232810	2.6981	2.88438	0.186277	0.0283755	0.20843	0.186277	1.66469	0.0970979	0.130552	TNF	TNFA_NFKB	Tumor necrosis factor (TNF-α)	Master cytokine – ↑↑↑↑ in sepsis, usually normal/low in ASD brain
ENSG00000100412	5.55502	5.72141	0.166383	0.0653943	0.175214	0.166383	1.65866	0.0983092	0.131079	ACO2	TCA	Aconitase 2 (mitochondrial)	Citrate ↔ cis-aconitate ↔ isocitrate
ENSG00000101365	5.30858	5.44929	0.140708	0.0919549	0.160256	0.140708	1.58163	0.114868	0.151891	IDH3B	TCA	Isocitrate dehydrogenase 3 (NAD⁺) β subunit	Main TCA catalytic enzyme
ENSG00000131828	5.06343	4.96648	-0.0969484	0.0255534	-0.212315	-0.0969484	-1.49836	0.135172	0.177275	PDHA1	PDH	Pyruvate dehydrogenase E1 α subunit (somatic)	Core catalytic subunit – X-linked, most frequently mutated / ↓↓↓ in ASD
ENSG00000004799	4.60715	4.28875	-0.318397	0.295819	-0.0994561	-0.318397	-1.44578	0.149361	0.193559	PDK4	PDH	Pyruvate dehydrogenase kinase isoform 4	Muscle/heart, starvation-induced – usually low/unchanged in brain/ASD
ENSG00000111537	-0.269958	-0.665704	-0.395746	0.124326	-0.145785	-0.395746	-1.44348	0.150008	0.193559	IFNG	IFNγ	Interferon-γ	Master type-1 cytokine – ↑↑↑ in viral/bacterial sepsis, usually low in ASD
ENSG00000081041	-2.40427	-2.17423	0.230036	0.131681	0.138986	0.230036	1.40944	0.159819	0.204569	CXCL2	Acute_Inflammation	C-X-C motif chemokine ligand 2 (GRO-β)	Same family, same pattern
ENSG00000168291	4.86018	4.95762	0.097442	0.0742087	0.169775	0.097442	1.35811	0.175527	0.222892	PDHB	PDH	Pyruvate dehydrogenase E1 β subunit	Core catalytic subunit – frequently ↓ or mutated in ASD
ENSG00000146085	3.94589	4.05139	0.105501	0.0558705	0.181818	0.105501	1.34688	0.179113	0.225654	MMUT	PSA	Methylmalonyl-CoA mutase	Isomerase
ENSG00000213341	5.04109	5.20888	0.167786	0.0967841	0.157925	0.167786	1.29026	0.19803	0.247537	CHUK	TNFA_NFKB	Conserved helix-loop-helix ubiquitous kinase (IKKα)	IKK complex – activated in sepsis, quiescent in most ASD
ENSG00000162654	6.73055	7.05983	0.329281	0.31708	0.0951826	0.329281	1.2326	0.218761	0.271332	GBP4	IFNγ	Guanylate-binding protein 4	Same family
ENSG00000108691	-1.9476	-1.56498	0.382614	0.724526	-0.0325369	0.382614	1.16702	0.244198	0.300552	CCL2	Acute_Inflammation	C-C motif chemokine ligand 2 (MCP-1)	Monocyte/macrophage recruitment – ↑↑↑ in sepsis, low/variable in ASD
ENSG00000136143	3.66922	3.77772	0.108503	0.120585	0.14763	0.108503	1.12398	0.261989	0.311949	SUCLA2	TCA	Succinate-CoA ligase (ADP-forming) β subunit	Brain/abundant isoform – mutations cause severe mtDNA depletion + ASD
ENSG00000141959	5.83394	5.97799	0.144055	0.171835	0.129953	0.144055	1.12485	0.261619	0.311949	PFKL	cSLP	Phosphofructokinase liver	Rate-limiting step
ENSG00000143384	10.6063	10.7407	0.134444	0.0951523	0.158702	0.134444	1.12881	0.259949	0.311949	MCL1	IL6_STAT3	Myeloid cell leukaemia 1	Another anti-apoptotic STAT3 target – ↑↑ in sepsis, low in ASD
ENSG00000167315	4.74877	4.84426	0.0954862	0.129637	0.144134	0.0954862	1.12345	0.262214	0.311949	ACAA2	FAO	Acetyl-CoA acyltransferase 2	Acetyl-CoA acyltransferase 2
ENSG00000177646	4.04564	3.94351	-0.102135	0.374507	-0.0844988	-0.102135	-1.12111	0.263207	0.311949	ACAD9	FAO	Acyl-CoA dehydrogenase family member 9	Long/Very Long-Chain Acyl-CoA Dehydrogenases
ENSG00000163739	2.52148	2.74857	0.227087	0.0133568	0.235237	0.227087	1.10515	0.270047	0.317702	CXCL1	Acute_Inflammation	C-X-C motif chemokine ligand 1 (GRO-α)	Neutrophil recruitment – massive in sepsis, near-zero in ASD
ENSG00000114054	3.31485	3.43733	0.122477	0.150472	0.136752	0.122477	1.09263	0.2755	0.321752	PCCB	PSA	Propionyl-CoA carboxylase subunit beta	Ligase
ENSG00000118503	6.04729	6.22813	0.18084	0.718291	0.0343823	0.18084	1.06611	0.287295	0.333095	TNFAIP3	TNFA_NFKB	TNF-α-induced protein 3 (A20)	Major negative feedback – often ↓/mutated in autoimmune, normal in ASD
ENSG00000112715	3.16348	3.30856	0.145072	0.158761	0.134033	0.145072	1.02748	0.305083	0.351175	VEGFA	HIF1A	Vascular endothelial growth factor A	Classic HIF target – neuroprotection/angiogenesis; variable in ASD but often ↑ at protein level
ENSG00000102962	-2.87581	-2.9788	-0.102983	0.0761998	-0.12364	-0.102983	-1.01692	0.310071	0.351854	CCL22	IL4_Th2	C-C motif chemokine ligand 22 (MDC)	Same CCR4 axis – strongly induced by IL-4, ↑ in many ASD blood studies
ENSG00000138755	-0.989359	-0.715283	0.274076	0.313893	0.0956682	0.274076	1.0199	0.308658	0.351854	CXCL9	IFNγ	C-X-C motif chemokine ligand 9 (MIG)	Strongest IFN-γ-inducible chemokine – ↑↑↑↑ in sepsis, low/near-zero in most ASD
ENSG00000100644	7.27393	7.42526	0.151336	0.275534	0.10373	0.151336	0.913689	0.36167	0.407515	HIF1A	HIF1A	Hypoxia-inducible factor 1-alpha	Master regulator – protein stabilised/activated in many ASD brains despite normal or low mRNA
ENSG00000167792	5.32217	5.21053	-0.111635	0.472497	-0.0683761	-0.111635	-0.890545	0.373941	0.418396	NDUFV1	OXPHOS	NADH:ubiquinone oxidoreductase flavoprotein 1	Complex I core subunit – frequently mutated/down in ASD
ENSG00000127884	4.40976	4.50862	0.0988613	0.260524	0.107032	0.0988613	0.859567	0.390766	0.434185	ECHS1	FAO	Enoyl-CoA Hydratase	Enoyl-CoA Hydratase
ENSG00000117054	4.12872	4.02226	-0.106458	0.58878	-0.0514763	-0.106458	-0.81749	0.414346	0.45721	ACADM	FAO	Medium-Chain Acyl-CoA Dehydrogenase	Medium/Short-Chain
ENSG00000005882	3.38032	3.2728	-0.107516	0.745973	-0.0308858	-0.107516	-0.781819	0.434984	0.476695	PDK2	PDH	Pyruvate dehydrogenase kinase isoform 2	Broadly expressed inhibitor – mild-to-moderate ↑ in some ASD subgroups
ENSG00000067057	4.40008	4.49631	0.0962326	0.363613	0.0864413	0.0962326	0.771021	0.441347	0.480378	PFKP	Glycolysis	Phosphofructokinase-1, platelet subunit	3. Fructose-6-P → Fructose-1,6-BP (committed step)
ENSG00000166123	0.960503	1.11265	0.152143	0.175713	0.128788	0.152143	0.747459	0.455416	0.492342	GPT2	mSLP	Alanine aminotransferase 2, mitochondrial	Alanine ↔ pyruvate + glutamate ↔ α-KG – important for neuronal amino-acid shuttling & energy
ENSG00000102970	-3.24598	-3.22384	0.0221473	0.386442	0.0224359	0.0221473	0.706831	0.480262	0.515717	CCL17	IL4_Th2	C-C motif chemokine ligand 17 (TARC)	Classic Th2 chemokine – attracts CCR4+ Tregs & Th2 cells – ↑ in ASD with allergy/atopy
ENSG00000170950	-3.21062	-3.22847	-0.0178583	0.562121	-0.017871	-0.0178583	-0.686883	0.492727	0.525575	PGK2	cSLP	Phosphoglycerate kinase 2 (testis-specific)	Direct ATP-producing enzyme (cSLP step 1)
ENSG00000159399	6.00709	6.10828	0.101182	0.29866	0.0988733	0.101182	0.668146	0.504593	0.531151	HK2	Glycolysis	Hexokinase 2	1. Glucose → Glucose-6-phosphate (cancer isoform)
ENSG00000275302	3.48105	3.60456	0.123508	0.350805	0.0887723	0.123508	0.671733	0.50231	0.531151	CCL4	Acute_Inflammation	C-C motif chemokine ligand 4 (MIP-1β)	Same family, strong sepsis induction
ENSG00000205560	-0.210915	-0.0979883	0.112927	0.131177	0.143551	0.112927	0.612546	0.540676	0.565413	CPT1B	FAO	Carnitine palmitoyltransferase 1B	Carnitine Shuttle
ENSG00000091483	4.31732	4.37036	0.0530412	0.80546	0.0235043	0.0530412	0.540935	0.588984	0.611932	FH	TCA	Fumarate hydratase	Fumarate → malate
ENSG00000115361	-3.24598	-3.23647	0.00951092	0.447726	0.0182595	0.00951092	0.514416	0.607369	0.626961	ACADL	FAO	Long-chain acyl-CoA dehydrogenase	Long/Very Long-Chain Acyl-CoA Dehydrogenases
ENSG00000135766	7.53544	7.4608	-0.0746422	0.773986	0.0273893	-0.0746422	-0.440674	0.65979	0.676708	EGLN1	HIF1A	Egl-9 family hypoxia-inducible factor 1 (PHD2)	Main oxygen sensor – hydroxylates & degrades HIF-α; often dysregulated in ASD
ENSG00000173599	0.882756	0.801958	-0.0807981	0.784176	-0.0261267	-0.0807981	-0.433669	0.664864	0.677568	PC	TCA	Pyruvate carboxylase	Anaplerosis: pyruvate → oxaloacetate (critical in astrocytes)
ENSG00000162692	-2.22588	-2.31513	-0.0892467	0.289239	-0.0932401	-0.0892467	-0.42604	0.670407	0.678893	VCAM1	Acute_Inflammation	Vascular cell adhesion molecule 1	Same endothelial activation pattern as ICAM1
ENSG00000073578	5.72111	5.73713	0.0160141	0.908066	0.0110723	0.0160141	0.19652	0.844346	0.849657	SDHA	TCA	Succinate dehydrogenase flavoprotein subunit A	Complex II + TCA: succinate → fumarate + FADH₂
ENSG00000115009	-2.32131	-2.35185	-0.0305475	0.516153	-0.0580808	-0.0305475	-0.167931	0.866759	0.866759	CCL20	IL6_STAT3	C-C motif chemokine ligand 20 (MIP-3α)	Strong STAT3 target – ↑↑ in sepsis, very low in ASD

## Sheet: Healthy_vs_Medium_Module
Module	Mean logCPM (Healthy)	Mean logCPM (Medium SOFA)	Delta	p_raw	p_adj	Signif
Acute_Inflammation	2.63993	3.25868	0.618754	4.17739e-10	2.22794e-09	***
FAO	3.97338	4.2308	0.257421	5.89844e-06	1.17969e-05	***
Glycolysis	6.54684	7.383	0.836152	8.36407e-14	6.69125e-13	***
HIF1A	4.5444	4.87293	0.328525	0.00011701	0.000208018	***
IFNγ	5.52654	6.16748	0.640944	0.000188555	0.000301689	***
IL10	3.12171	3.851	0.729287	3.38603e-09	1.35441e-08	***
IL4_Th2	3.5402	3.72496	0.184761	0.000881191	0.00108454	**
IL6_STAT3	6.57866	7.10877	0.530113	8.73486e-07	2.40885e-06	***
OXPHOS	5.06862	5.55797	0.489348	9.03319e-07	2.40885e-06	***
PDH	4.32329	4.1156	-0.207688	0.00250044	0.00285765	**
PSA	2.93502	2.83722	-0.0978033	0.0164743	0.0175726	*
TCA	5.12885	5.29399	0.165138	0.000226184	0.000328995	***
TNFA_NFKB	5.94778	6.37377	0.425989	1.17996e-06	2.69705e-06	***
cSLP	2.95481	3.14879	0.193982	0.000315432	0.000420575	***
mSLP	4.111	3.97326	-0.137736	0.0902224	0.0902224
Tau_index	-1.30503	0.35391	1.65894	1.02589e-15	1.64143e-14	***

## Sheet: Healthy_vs_Medium_Gene
ENSG	Mean_g1	Mean_g2	Delta	p_raw_wilcox	Cliff	logFC	T_value	p_raw_limma	p_adj_limma	GeneSymbol	Modules	Enzyme	Category	Signif
ENSG00000143546	8.04657	11.715	3.66848	1.04058e-16	0.956061	3.66848	14.4332	1.15132e-26	1.84211e-24	S100A8	Acute_Inflammation	S100 calcium-binding protein A8 (calprotectin subunit)	Best blood marker of bacterial inflammation – ↑↑↑↑ in sepsis, normal in ASD	***
ENSG00000163220	10.5106	13.4559	2.94525	1.61845e-16	0.95	2.94525	13.8488	2.00392e-25	1.60313e-23	S100A9	Acute_Inflammation	S100 calcium-binding protein A9 (calprotectin subunit)	Same as S100A8 – extremely high in sepsis plasma	***
ENSG00000160883	6.03479	8.57127	2.53648	1.6541e-14	0.884091	2.53648	11.5904	1.7128e-20	9.13492e-19	HK3	cSLP	Hexokinase 3	Minor in most tissues	***
ENSG00000111640	9.16302	10.6847	1.5217	4.57817e-14	0.868939	1.5217	11.1972	1.28731e-19	5.14922e-18	GAPDH	Glycolysis	Glyceraldehyde-3-phosphate dehydrogenase	6. GAP → 1,3-Bisphosphoglycerate (NAD⁺ → NADH)	***
ENSG00000117118	5.00464	5.80688	0.802239	2.49059e-14	0.87803	0.802239	10.9822	3.89147e-19	1.24527e-17	SDHB	TCA	Succinate dehydrogenase iron-sulfur subunit B	Complex II + TCA	***
ENSG00000102144	8.2727	9.44976	1.17705	3.47924e-15	0.906818	1.17705	10.7438	1.32903e-18	3.19529e-17	PGK1	Glycolysis	Phosphoglycerate kinase 1	7. 1,3-BPG → 3-PG (substrate-level phosphorylation)	***
ENSG00000134333	7.24337	8.74431	1.50095	2.65142e-16	0.943182	1.50095	10.734	1.39794e-18	3.19529e-17	LDHA	cSLP	Lactate dehydrogenase A (M subunit)	Regenerates NAD⁺ in cytoplasm – critical for glycolysis	***
ENSG00000107485	5.12398	3.34846	-1.77553	1.41777e-14	-0.886364	-1.77553	-10.1076	3.55316e-17	7.10632e-16	GATA3	IL4_Th2	GATA binding protein 3	Master regulator of Th2 differentiation – frequently ↑ in ASD peripheral blood	***
ENSG00000111674	4.55789	3.26711	-1.29078	2.03039e-14	-0.881061	-1.29078	-9.64563	3.86615e-16	6.87316e-15	ENO2	cSLP	Enolase 2 (neuron-specific, gamma)	Brain-specific enolase	***
ENSG00000138413	5.09276	6.08711	0.994353	4.57817e-14	0.868939	0.994353	9.61668	4.48969e-16	7.1835e-15	IDH1	TCA	Isocitrate dehydrogenase 1 (cytosolic/NADP⁺)	Mainly NADPH production (minor TCA role in brain)	***
ENSG00000163541	4.93312	5.62702	0.693902	1.94373e-13	0.84697	0.693902	9.33029	1.96764e-15	2.86202e-14	SUCLG1	TCA	Succinate-CoA ligase (GDP/ADP-forming) α subunit	Substrate-level phosphorylation (succinyl-CoA → succinate + GTP/ATP)	***
ENSG00000059804	8.17188	9.92628	1.75439	2.26594e-12	0.808333	1.75439	9.29562	2.35265e-15	3.13687e-14	SLC2A3	Glycolysis	Glucose transporter 3 (GLUT3)	Glucose uptake	***
ENSG00000138029	6.43174	6.94561	0.513869	1.94373e-13	0.84697	0.513869	8.9155	1.66244e-14	2.04608e-13	HADHB	FAO	Trifunctional Enzyme Subunit Beta	Trifunctional Protein	***
ENSG00000067225	8.60337	9.51135	0.907977	1.16745e-12	0.818939	0.907977	8.68447	5.43177e-14	6.20774e-13	PKM	Glycolysis	Pyruvate kinase M1/M2	10. PEP → Pyruvate (final rate-limiting step)	***
ENSG00000184557	4.82764	7.21631	2.38867	1.20016e-11	0.781061	2.38867	8.66438	6.01973e-14	6.42104e-13	SOCS3	IL6_STAT3	Suppressor of cytokine signalling 3	Classic negative-feedback gene – ↑↑↑↑ in sepsis, low in ASD	***
ENSG00000159128	7.51399	8.63987	1.12588	1.50627e-11	0.777273	1.12588	8.60206	8.27791e-14	8.27791e-13	IFNGR2	IFNγ	Interferon-γ receptor 2	Chain-2 – induced by IFN-γ	***
ENSG00000027697	7.53777	8.74403	1.20626	3.86599e-11	0.761364	1.20626	8.31458	3.58165e-13	3.37097e-12	IFNGR1	IFNγ	Interferon-γ receptor 1	Chain-1 of receptor – constitutive expression	***
ENSG00000105639	7.52346	8.82124	1.29778	7.82887e-11	0.749242	1.29778	8.20125	6.36532e-13	5.65807e-12	JAK3	IL4_Th2	Janus kinase 3	Lymphocyte-specific – strongly associated with IL-4 pathway	***
ENSG00000111669	6.85916	7.69844	0.839281	9.32335e-11	0.746212	0.839281	8.11107	1.00484e-12	8.46181e-12	TPI1	Glycolysis	Triosephosphate isomerase	5. DHAP ↔ Glyceraldehyde-3-P	***
ENSG00000074800	8.29378	9.15187	0.858092	1.88845e-11	0.773485	0.858092	8.09919	1.06706e-12	8.53645e-12	ENO1	Glycolysis	Enolase 1	9. 2-Phosphoglycerate → Phosphoenolpyruvate	***
ENSG00000170525	5.71952	7.83557	2.11605	2.30715e-10	0.730303	2.11605	7.92347	2.58877e-12	1.9724e-11	PFKFB3	HIF1A	6-phosphofructo-2-kinase/fructose-2,6-biphosphatase 3	Key glycolytic driver – brain isoform; highly sensitive to HIF activation but variable in ASD	***
ENSG00000169021	4.13796	4.88194	0.743976	2.02935e-10	0.732576	0.743976	7.73836	6.55423e-12	4.76671e-11	UQCRFS1	OXPHOS	Ubiquinol-cytochrome c reductase Rieske iron-sulfur	Complex III Rieske protein – often ↓	***
ENSG00000110955	7.72062	8.33609	0.615473	1.37787e-10	0.739394	0.615473	7.70715	7.66143e-12	5.32969e-11	ATP5F1B	OXPHOS	ATP synthase F1 subunit beta	Complex V catalytic core – strongly ↓ in almost every ASD cohort	***
ENSG00000178537	4.50372	5.11495	0.611233	1.92741e-09	0.691667	0.611233	7.18831	1.00129e-10	6.67526e-10	SLC25A20	FAO	Carnitine/acylcarnitine translocase	Carnitine Shuttle	***
ENSG00000171314	5.39904	6.13707	0.738029	6.3513e-10	0.712121	0.738029	7.17814	1.05246e-10	6.73577e-10	PGAM1	Glycolysis	Phosphoglycerate mutase 1	8. 3-Phosphoglycerate → 2-Phosphoglycerate	***
ENSG00000172840	3.33804	2.46655	-0.87149	1.33587e-08	-0.654545	-0.87149	-6.80585	6.42882e-10	3.9562e-09	PDP2	PDH	Pyruvate dehydrogenase phosphatase catalytic subunit 2	Cytosolic, Ca²⁺-insensitive isoform – minor role in brain, usually unchanged	***
ENSG00000157184	3.93566	4.36532	0.429663	3.52398e-09	0.680303	0.429663	6.68028	1.1748e-09	6.96176e-09	CPT2	FAO	Carnitine palmitoyltransferase 2	Carnitine Shuttle	***
ENSG00000162434	9.18497	8.61869	-0.566279	3.52398e-09	-0.680303	-0.566279	-6.66602	1.25775e-09	7.18712e-09	JAK1	IFNγ	Janus kinase 1	Main signalling kinase – constitutive	***
ENSG00000243646	2.59566	3.4928	0.897141	5.67165e-09	0.671212	0.897141	6.6115	1.63167e-09	9.00231e-09	IL10RB	IL10	IL-10 receptor β (shared with IL-22/26/28)	Constitutive	***
ENSG00000158864	5.74739	6.25642	0.509031	2.77144e-09	0.684848	0.509031	6.56424	2.04345e-09	1.08984e-08	NDUFS2	OXPHOS	NADH:ubiquinone oxidoreductase iron-sulfur protein 2	Complex I core – pathogenic variants common in mitochondrial ASD	***
ENSG00000010256	5.22524	5.99044	0.765197	2.45913e-08	0.642424	0.765197	6.52308	2.4845e-09	1.28232e-08	UQCRC1	OXPHOS	Ubiquinol-cytochrome c reductase core protein 1	Complex III core – often ↓ in ASD	***
ENSG00000096968	5.97468	6.99912	1.02444	1.4426e-08	0.65303	1.02444	6.40604	4.32007e-09	2.16004e-08	JAK2	IFNγ	Janus kinase 2	Secondary kinase – constitutive	***
ENSG00000167863	5.03783	5.69463	0.656796	1.49038e-07	0.605303	0.656796	6.35055	5.60812e-09	2.71909e-08	ATP5PD	OXPHOS	ATP synthase peripheral stalk subunit D (ATP5H)	Complex V stator – frequently ↓	***
ENSG00000176171	3.27245	2.55651	-0.71594	5.80157e-08	-0.625	-0.71594	-6.21619	1.05081e-08	4.94498e-08	BNIP3	HIF1A	BCL2/adenovirus E1B 19kDa interacting protein 3	Mitophagy & cell-death mediator under chronic hypoxia; ↑ in some ASD subgroups	***
ENSG00000140374	4.97618	5.54829	0.572103	1.49903e-08	0.652273	0.572103	6.20855	1.0888e-08	4.97736e-08	ETFA	FAO	Electron Transfer Flavoprotein	Electron Transfer Flavoprotein	***
ENSG00000090339	5.22614	6.37511	1.14897	2.66227e-09	0.685606	1.14897	6.17534	1.2704e-08	5.64623e-08	ICAM1	Acute_Inflammation	Intercellular adhesion molecule 1	Endothelial activation & leukocyte adhesion – ↑↑↑ in sepsis, low in ASD	***
ENSG00000138796	3.94779	3.22686	-0.720929	2.45913e-08	-0.642424	-0.720929	-6.03795	2.39607e-08	1.03614e-07	HADH	FAO	Hydroxyacyl-CoA Dehydrogenase	Hydroxyacyl-CoA Dehydrogenase	***
ENSG00000091140	5.05198	5.62411	0.572131	3.52398e-09	0.680303	0.572131	5.98542	3.04883e-08	1.28372e-07	DLD	TCA	Dihydrolipoamide dehydrogenase (E3)	Shared E3 for α-KGDH and PDH complexes	***
ENSG00000077238	7.3059	8.49594	1.19004	3.23877e-07	0.588636	1.19004	5.97014	3.26957e-08	1.34136e-07	IL4R	IL4_Th2	Interleukin-4 receptor α (shared with IL-13)	Constitutive + induced in Th2-skewed states	***
ENSG00000069399	5.19291	6.62299	1.43007	1.60068e-07	0.603788	1.43007	5.86808	5.2046e-08	2.08184e-07	BCL3	IL10	B-cell lymphoma 3-encoded protein	IL-10 → stabilises repressive p50/p50 NF-κB homodimers → blocks pro-inflammatory genes	***
ENSG00000067992	4.35695	5.0827	0.725748	2.91698e-07	0.590909	0.725748	5.83791	5.9672e-08	2.27322e-07	PDK3	PDH	Pyruvate dehydrogenase kinase isoform 3	Brain-enriched – frequently ↑ in ASD (together with PDK1)	***
ENSG00000140740	6.02008	6.42718	0.407101	1.60068e-07	0.603788	0.407101	5.84286	5.83496e-08	2.27322e-07	UQCRC2	OXPHOS	Ubiquinol-cytochrome c reductase core protein 2	Complex III core – frequently reduced	***
ENSG00000234745	11.7089	12.5001	0.791197	1.60068e-07	0.603788	0.791197	5.8047	6.93387e-08	2.58004e-07	HLA-B	IFNγ	Major histocompatibility complex, class I, B	MHC-I induction – ↑ in active IFN-γ states	***
ENSG00000136634	-3.1269	-2.14447	0.982429	2.03262e-07	0.52803	0.982429	5.71589	1.03394e-07	3.75977e-07	IL10	IL10	Interleukin-10	Master anti-inflammatory cytokine – chronically ↑ in many ASD children (blood & brain)	***
ENSG00000162645	8.43827	9.43045	0.992186	5.80157e-08	0.625	0.992186	5.68633	1.18025e-07	4.19644e-07	GBP2	IFNγ	Guanylate-binding protein 2	Same family	***
ENSG00000172331	5.0669	6.60957	1.54268	9.9882e-07	0.563636	1.54268	5.49475	2.76035e-07	9.60123e-07	BPGM	cSLP	Bisphosphoglycerate mutase (2,3-BPG synthesis)	Modulates GAPDH/PGK step (mainly erythrocytes)	***
ENSG00000185338	0.845496	2.46382	1.61832	9.36646e-06	0.510606	1.61832	5.4581	3.24226e-07	1.10375e-06	SOCS1	IL4_Th2	Suppressor of cytokine signalling 1	Negative feedback – ↑ in chronic IL-4/Th2 states	***
ENSG00000104365	6.46823	6.18031	-0.287925	2.20263e-07	-0.59697	-0.287925	-5.44594	3.41962e-07	1.13987e-06	IKBKB	TNFA_NFKB	Inhibitor of κB kinase β (IKKβ)	Main kinase that frees NF-κB – massively active in sepsis	***
ENSG00000179091	3.95274	4.7036	0.750858	3.92091e-06	0.531818	0.750858	5.30858	6.21553e-07	2.02956e-06	CYC1	OXPHOS	Cytochrome c1	Complex III – heme protein, ↓ in many cohorts	***
ENSG00000072778	6.42328	7.01033	0.587049	4.17706e-06	0.530303	0.587049	5.23283	8.6121e-07	2.75587e-06	ACADVL	FAO	Very long-chain acyl-CoA dehydrogenase	Long/Very Long-Chain Acyl-CoA Dehydrogenases	***
ENSG00000178741	4.59284	5.16479	0.571951	3.98825e-07	0.584091	0.571951	5.22084	9.06651e-07	2.84439e-06	COX5A	OXPHOS	Cytochrome c oxidase subunit 5A	Complex IV – ↓ in brain ASD studies	***
ENSG00000100906	6.62215	7.58412	0.961964	3.85266e-07	0.584848	0.961964	5.11537	1.42108e-06	4.37255e-06	NFKBIA	TNFA_NFKB	NF-κB inhibitor alpha (IκBα)	Rapidly degraded in sepsis → NF-κB release; stable in ASD	***
ENSG00000125347	8.78835	9.56374	0.775387	1.47351e-05	0.499242	0.775387	5.04622	1.90293e-06	5.74471e-06	IRF1	IFNγ	Interferon regulatory factor 1	First-wave transcription factor – classic IFN-γ-induced gene	***
ENSG00000172340	4.92932	4.32044	-0.608881	9.34131e-07	-0.565152	-0.608881	-5.03284	2.01302e-06	5.96451e-06	SUCLG2	TCA	Succinate-CoA ligase (GDP/ADP-forming) β subunit	Determines GDP vs ADP specificity	***
ENSG00000110324	7.82518	7.43268	-0.392496	2.76015e-06	-0.540152	-0.392496	-5.0272	2.06125e-06	5.99636e-06	IL10RA	IL10	IL-10 receptor α	Constitutive + induced	***
ENSG00000168610	8.40776	9.12844	0.720682	5.07485e-07	0.578788	0.720682	4.96425	2.6823e-06	7.66372e-06	STAT3	IL6_STAT3	Signal transducer and activator of transcription 3	Principal transcription factor – massively phosphorylated/activated in sepsis, low in ASD	***
ENSG00000171503	3.85971	4.22704	0.367327	9.67639e-08	0.614394	0.367327	4.89273	3.60989e-06	1.0133e-05	ETFDH	FAO	Electron Transfer Flavoprotein	Electron Transfer Flavoprotein	***
ENSG00000067182	8.04051	8.85854	0.818023	5.62337e-07	0.576515	0.818023	4.88024	3.80118e-06	1.0486e-05	TNFRSF1A	TNFA_NFKB	TNF receptor superfamily member 1A (TNFR1)	Main signalling receptor – normal in ASD, strongly ↑ in sepsis	***
ENSG00000164919	2.81426	3.87965	1.06539	1.66013e-05	0.496212	1.06539	4.76829	6.01743e-06	1.63185e-05	COX6C	OXPHOS	Cytochrome c oxidase subunit 6C	Complex IV – ubiquitous isoform, often ↓	***
ENSG00000131143	6.68153	7.18945	0.507914	2.89869e-05	0.481818	0.507914	4.71561	7.45342e-06	1.98758e-05	COX4I1	OXPHOS	Cytochrome c oxidase subunit 4I1	Complex IV (most abundant isoform) – frequently ↓ in ASD	***
ENSG00000162711	4.77295	5.39547	0.622512	5.07485e-07	0.578788	0.622512	4.57375	1.31732e-05	3.45527e-05	NLRP3	Acute_Inflammation	NLR family pyrin domain containing 3	Major inflammasome platform – strongly activated in sepsis, mostly quiescent in ASD	***
ENSG00000143252	5.53084	5.88007	0.349224	3.75487e-05	0.475	0.349224	4.54238	1.49209e-05	3.85054e-05	SDHC	TCA	Succinate dehydrogenase complex subunit C	Complex II anchor	***
ENSG00000125166	4.85988	4.36181	-0.498078	3.13779e-06	-0.537121	-0.498078	-4.42316	2.38414e-05	6.05495e-05	GOT2	mSLP	Aspartate aminotransferase, mitochondrial	Malate-aspartate shuttle + transamination to feed OAA/α-KG into TCA/mSLP	***
ENSG00000125538	5.63133	6.66589	1.03457	2.06332e-06	0.54697	1.03457	4.3914	2.69774e-05	6.74435e-05	IL1B	Acute_Inflammation	Interleukin-1β	Master alarm cytokine – ↑↑↑↑ in sepsis, almost undetectable in ASD	***
ENSG00000105379	3.50227	4.02424	0.521978	6.4135e-05	0.460606	0.521978	4.37873	2.83369e-05	6.97525e-05	ETFB	FAO	Electron Transfer Flavoprotein	Electron Transfer Flavoprotein	***
ENSG00000149925	1.60069	2.4223	0.821603	0.000123462	0.442424	0.821603	4.36821	2.95157e-05	7.15532e-05	ALDOA	Glycolysis	Fructose-bisphosphate aldolase A	4. Fructose-1,6-BP → DHAP + GAP	***
ENSG00000169429	2.88079	1.51956	-1.36123	2.16565e-05	-0.489394	-1.36123	-4.35954	3.05221e-05	7.28886e-05	CXCL8	Acute_Inflammation	C-X-C motif chemokine ligand 8 (IL-8)	Strongest neutrophil chemoattractant – ↑↑↑↑↑ in sepsis, negligible in ASD	***
ENSG00000150768	4.24409	3.68928	-0.554815	3.64904e-05	-0.475758	-0.554815	-4.31468	3.62827e-05	8.53712e-05	DLAT	PDH	Dihydrolipoamide S-acetyltransferase (E2)	Core lipoamide swinging arm – ↓ in many ASD cohorts	***
ENSG00000164951	4.79341	3.98719	-0.806218	6.4135e-05	-0.460606	-0.806218	-4.18564	5.92883e-05	0.00013748	PDP1	PDH	Pyruvate dehydrogenase phosphatase catalytic subunit 1	Main mitochondrial activator (Ca²⁺-sensitive) – often ↓ in ASD (less de-repression)	***
ENSG00000119689	5.86336	5.70524	-0.158122	0.000165371	-0.434091	-0.158122	-4.03001	0.000105874	0.000241999	DLST	TCA	Dihydrolipoamide S-succinyltransferase (E2)	Part of α-KGDH complex	***
ENSG00000156515	7.05663	7.59639	0.539766	9.36646e-06	0.510606	0.539766	4.01933	0.000110115	0.000248147	HK1	Glycolysis	Hexokinase 1	1. Glucose → Glucose-6-phosphate (rate-limiting)	***
ENSG00000117228	7.02641	8.2652	1.23879	0.00136982	0.368939	1.23879	4.00763	0.000114947	0.000255438	GBP1	IFNγ	Guanylate-binding protein 1	Classic IFN-γ-inducible GTPase – ↑↑↑ in sepsis, very low in ASD	***
ENSG00000110090	6.31906	6.73518	0.416116	0.000161068	0.434848	0.416116	3.92551	0.00015504	0.000335223	CPT1A	FAO	Carnitine palmitoyltransferase 1A	Carnitine Shuttle	***
ENSG00000213341	5.04109	5.49934	0.458245	7.57131e-05	0.456061	0.458245	3.92834	0.000153461	0.000335223	CHUK	TNFA_NFKB	Conserved helix-loop-helix ubiquitous kinase (IKKα)	IKK complex – activated in sepsis, quiescent in most ASD	***
ENSG00000111716	7.23173	6.61393	-0.617794	3.44582e-05	-0.477273	-0.617794	-3.92004	0.00015814	0.000337366	LDHB	cSLP	Lactate dehydrogenase B (H subunit)	Minor role in brain	***
ENSG00000014641	4.99861	5.46166	0.463052	0.00101452	0.378788	0.463052	3.88106	0.000181999	0.000383155	MDH1	TCA	Malate dehydrogenase 1 (cytosolic)	OAA ↔ malate (shuttle function, minor direct TCA)	***
ENSG00000109320	6.67372	7.07962	0.405902	4.7128e-05	0.468939	0.405902	3.81005	0.000234534	0.000487344	NFKB1	TNFA_NFKB	Nuclear factor NF-κB p105/p50 subunit	Core subunit – mild activation in some ASD, massive in sepsis	***
ENSG00000062485	6.68192	6.44414	-0.237781	0.000107926	-0.446212	-0.237781	-3.79566	0.000246809	0.000506274	CS	TCA	Citrate synthase	TCA entry: acetyl-CoA + OAA → citrate	***
ENSG00000129521	1.36993	0.825135	-0.544797	0.000376216	-0.409848	-0.544797	-3.76769	0.000272446	0.000551789	EGLN3	HIF1A	Egl-9 family hypoxia-inducible factor 3 (PHD3)	Brain-enriched prolyl hydroxylase – strongly induced by hypoxia	***
ENSG00000116016	1.86071	2.70017	0.839455	3.44582e-05	0.477273	0.839455	3.64106	0.000423578	0.000847156	EPAS1	HIF1A	Endothelial PAS domain protein 1 (HIF-2α)	HIF-2α – important in neural stem cells & astrocytes; altered in some ASD subgroups	***
ENSG00000073756	5.06562	4.22881	-0.836808	0.000519113	-0.4	-0.836808	-3.5893	0.000505854	0.000999219	PTGS2	Acute_Inflammation	Prostaglandin-endoperoxide synthase 2 (COX-2)	Inducible cyclooxygenase – prostaglandin storm in sepsis, low in ASD brain	***
ENSG00000137265	4.96442	4.13242	-0.832004	2.29654e-05	-0.487879	-0.832004	-3.5701	0.000540044	0.00105374	IRF4	IL4_Th2	Interferon regulatory factor 4	Co-operates with STAT6 for Th2 programme – frequently ↑ in ASD immune cells	**
ENSG00000109107	3.78663	3.28828	-0.498353	0.000126812	-0.441667	-0.498353	-3.4572	0.000789588	0.0015221	ALDOC	cSLP	Aldolase C (brain-specific)	Predominant aldolase isoform in adult brain	**
ENSG00000084754	7.36572	7.57321	0.207485	0.000198658	0.428788	0.207485	3.39316	0.000975855	0.00185877	HADHA	FAO	Trifunctional Enzyme Subunit Alpha	Trifunctional Protein	**
ENSG00000108515	2.33085	1.86742	-0.463431	0.00691539	-0.311364	-0.463431	-3.35048	0.00112211	0.00211222	ENO3	cSLP	Enolase 3 (beta, muscle)	Muscle-specific (low in brain)	**
ENSG00000175198	2.57249	2.15441	-0.418084	0.000405481	-0.407576	-0.418084	-3.2366	0.00161922	0.00301251	PCCA	PSA	Propionyl-CoA carboxylase subunit alpha	Ligase	**
ENSG00000152556	2.91601	2.60398	-0.312034	0.00167959	-0.362121	-0.312034	-3.18781	0.00188969	0.0034753	PFKM	cSLP	Phosphofructokinase muscle	Rate-limiting step	**
ENSG00000112715	3.16348	3.61252	0.449037	0.00164224	0.362879	0.449037	3.12129	0.00232656	0.00423011	VEGFA	HIF1A	Vascular endothelial growth factor A	Classic HIF target – neuroprotection/angiogenesis; variable in ASD but often ↑ at protein level	**
ENSG00000169245	-0.197249	1.05304	1.25029	0.00882158	0.301894	1.25029	3.04542	0.00293858	0.00528285	CXCL10	IFNγ	C-X-C motif chemokine ligand 10 (IP-10)	Same family – one of the best markers of active IFN-γ response	**
ENSG00000105679	-3.08775	-3.24598	-0.158238	0.0047047	-0.159091	-0.158238	-3.03425	0.00304037	0.00540509	GAPDHS	cSLP	Spermatogenic GAPDH (rarely expressed in brain)	Same as GAPDH (usually ignore in brain)	**
ENSG00000105397	7.11117	7.50448	0.393313	0.00638724	0.314394	0.393313	2.95285	0.00388626	0.00683299	TYK2	IL6_STAT3	Tyrosine kinase 2	Minor role in IL-6 signalling – constitutive	**
ENSG00000169248	-2.62649	-1.86735	0.759139	0.034837	0.230303	0.759139	2.88076	0.00481115	0.00836722	CXCL11	IFNγ	C-X-C motif chemokine ligand 11 (I-TAC)	Same CXCR3-ligand family – same pattern	**
ENSG00000067829	4.8774	5.20149	0.324093	0.0041651	0.330303	0.324093	2.86186	0.00508508	0.00874853	IDH3G	TCA	Isocitrate dehydrogenase 3 (NAD⁺) γ subunit	Main TCA catalytic enzyme	**
ENSG00000117394	4.73467	5.22442	0.489753	0.0218502	0.264394	0.489753	2.84801	0.00529477	0.00901238	SLC2A1	Glycolysis	Glucose transporter 1 (GLUT1)	Glucose uptake	**
ENSG00000131473	6.56704	6.3813	-0.185738	0.0147806	-0.281061	-0.185738	-2.83235	0.00554151	0.00933306	ACLY	TCA	ATP-citrate lyase	Citrate (mito → cyto) → acetyl-CoA + OAA (lipids, epigenetics)	**
ENSG00000118503	6.04729	6.53106	0.483773	0.0127618	0.287121	0.483773	2.75027	0.00701501	0.0116917	TNFAIP3	TNFA_NFKB	TNF-α-induced protein 3 (A20)	Major negative feedback – often ↓/mutated in autoimmune, normal in ASD	*
ENSG00000100644	7.27393	7.70589	0.431963	0.00239384	0.35	0.431963	2.67752	0.00861033	0.0140577	HIF1A	HIF1A	Hypoxia-inducible factor 1-alpha	Master regulator – protein stabilised/activated in many ASD brains despite normal or low mRNA	*
ENSG00000204370	5.44283	5.66634	0.223512	0.00122141	0.372727	0.223512	2.67781	0.0086033	0.0140577	SDHD	TCA	Succinate dehydrogenase complex subunit D	Complex II anchor	*
ENSG00000139180	2.83167	3.09231	0.26064	0.00874315	0.302273	0.26064	2.66473	0.00892271	0.0144205	NDUFA9	OXPHOS	NADH:ubiquinone oxidoreductase subunit A9	Complex I accessory – often ↓ in ASD brain cohorts	*
ENSG00000160712	8.9155	9.26435	0.348847	0.000711364	0.390152	0.348847	2.65559	0.00915208	0.0146433	IL6R	IL6_STAT3	Interleukin-6 receptor α	Membrane-bound receptor – moderate constitutive	*
ENSG00000081041	-2.40427	-1.89687	0.507396	0.00781578	0.300758	0.507396	2.65115	0.00926556	0.0146781	CXCL2	Acute_Inflammation	C-X-C motif chemokine ligand 2 (GRO-β)	Same family, same pattern	*
ENSG00000113520	-2.32217	-2.74198	-0.419806	0.00546449	-0.299621	-0.419806	-2.58698	0.011052	0.0173365	IL4	IL4 Th2	Interleukin-4	Master Th2 cytokine – ↑ in many ASD children with atopy, GI issues, chronic LPS exposure	*
ENSG00000115415	8.55069	9.02287	0.472178	0.0649569	0.212879	0.472178	2.58229	0.0111942	0.0173891	STAT1	IFNγ	Signal transducer and activator of transcription 1	Principal transcription factor – strongly phosphorylated/up in active IFN-γ response	*
ENSG00000173039	5.99113	6.28291	0.291776	0.0142511	0.282576	0.291776	2.50946	0.013621	0.0209554	RELA	TNFA_NFKB	RELA proto-oncogene, NF-κB subunit (p65)	Transcriptionally active subunit – strongly ↑ in sepsis, low in ASD	*
ENSG00000148672	6.51261	6.33607	-0.176538	0.0751154	-0.205303	-0.176538	-2.47546	0.0149074	0.0227161	GLUD1	mSLP	Glutamate dehydrogenase 1 (ubiquitous)	Glutamate → α-ketoglutarate + NADH/NADPH – major neuronal anaplerosis & reducing power	*
ENSG00000163734	-2.54434	-2.08371	0.460628	0.0346568	0.234848	0.460628	2.40249	0.0180413	0.0272322	CXCL3	Acute_Inflammation	C-X-C motif chemokine ligand 3 (GRO-γ)	Same family, same pattern	*
ENSG00000105953	6.41777	6.65245	0.234675	0.0173835	0.274242	0.234675	2.38745	0.0187559	0.0280462	OGDH	TCA	Oxoglutarate dehydrogenase (E1)	α-ketoglutarate → succinyl-CoA + NADH	*
ENSG00000135390	5.37659	5.69372	0.317138	0.0282161	0.25303	0.317138	2.37923	0.0191569	0.0283805	ATP5MC2	OXPHOS	ATP synthase membrane subunit c isoform 2	Complex V ring – brain isoform	*
ENSG00000143384	10.6063	10.8524	0.246155	0.012297	0.288636	0.246155	2.33795	0.0212873	0.0312474	MCL1	IL6_STAT3	Myeloid cell leukaemia 1	Another anti-apoptotic STAT3 target – ↑↑ in sepsis, low in ASD	*
ENSG00000146085	3.94589	4.13156	0.185669	0.00461882	0.326515	0.185669	2.31016	0.0228371	0.0332176	MMUT	PSA	Methylmalonyl-CoA mutase	Isomerase	*
ENSG00000159399	6.00709	6.37487	0.367781	0.0145137	0.281818	0.367781	2.28265	0.0244683	0.0352696	HK2	Glycolysis	Hexokinase 2	1. Glucose → Glucose-6-phosphate (cancer isoform)	*
ENSG00000102962	-2.87581	-3.0945	-0.218688	0.0421246	-0.175758	-0.218688	-2.27536	0.0249178	0.0355968	CCL22	IL4_Th2	C-C motif chemokine ligand 22 (MDC)	Same CCR4 axis – strongly induced by IL-4, ↑ in many ASD blood studies	*
ENSG00000205560	-0.210915	0.23373	0.444646	0.000990951	0.379545	0.444646	2.26782	0.0253899	0.0359504	CPT1B	FAO	Carnitine palmitoyltransferase 1B	Carnitine Shuttle	*
ENSG00000163739	2.52148	2.93547	0.413984	0.0156073	0.278788	0.413984	2.23587	0.0274786	0.0385664	CXCL1	Acute_Inflammation	C-X-C motif chemokine ligand 1 (GRO-α)	Neutrophil recruitment – massive in sepsis, near-zero in ASD	*
ENSG00000122971	2.40626	2.83095	0.424684	0.0127618	0.287121	0.424684	2.22652	0.0281172	0.0391196	ACADS	FAO	Short-Chain Acyl-CoA Dehydrogenase	Medium/Short-Chain	*
ENSG00000166411	4.77969	4.54193	-0.23776	0.0189966	-0.270455	-0.23776	-2.20538	0.0296106	0.0408422	IDH3A	TCA	Isocitrate dehydrogenase 3 (NAD⁺) α subunit	Main TCA catalytic enzyme: isocitrate → α-ketoglutarate + NADH	*
ENSG00000182054	5.46483	5.8059	0.341074	0.0818095	0.200758	0.341074	2.14621	0.0341618	0.046717	IDH2	TCA	Isocitrate dehydrogenase 2 (mitochondrial/NADP⁺)	Reductive carboxylation + NADPH (important in ASD mitochondria)	*
ENSG00000232810	2.6981	2.97426	0.276158	0.0940349	0.193182	0.276158	1.91863	0.0577502	0.0783054	TNF	TNFA_NFKB	Tumor necrosis factor (TNF-α)	Master cytokine – ↑↑↑↑ in sepsis, usually normal/low in ASD brain
ENSG00000167792	5.32217	5.07293	-0.249236	0.102047	-0.188636	-0.249236	-1.78596	0.0769956	0.103523	NDUFV1	OXPHOS	NADH:ubiquinone oxidoreductase flavoprotein 1	Complex I core subunit – frequently mutated/down in ASD
ENSG00000177646	4.04564	3.87149	-0.174158	0.136156	-0.17197	-0.174158	-1.7687	0.0798511	0.106468	ACAD9	FAO	Acyl-CoA dehydrogenase family member 9	Long/Very Long-Chain Acyl-CoA Dehydrogenases
ENSG00000152234	7.59695	7.75169	0.154742	0.170117	0.158333	0.154742	1.75927	0.0814473	0.107699	ATP5F1A	OXPHOS	ATP synthase F1 subunit alpha	Complex V catalytic core – almost always ↓ in ASD
ENSG00000134352	6.97311	6.67907	-0.294038	0.0621403	-0.215152	-0.294038	-1.72411	0.0876334	0.114929	IL6ST	IL6_STAT3	Interleukin-6 signal transducer (gp130)	Shared co-receptor – strongly induced in sepsis
ENSG00000005882	3.38032	3.13769	-0.242632	0.136156	-0.17197	-0.242632	-1.70504	0.0911479	0.118566	PDK2	PDH	Pyruvate dehydrogenase kinase isoform 2	Broadly expressed inhibitor – mild-to-moderate ↑ in some ASD subgroups
ENSG00000159199	2.9715	3.23476	0.263258	0.174251	0.156818	0.263258	1.69382	0.0932678	0.120346	ATP5MC1	OXPHOS	ATP synthase membrane subunit c isoform 1	Complex V ring – highly expressed, often ↓
ENSG00000136244	-2.05543	-2.39207	-0.336633	0.0228373	-0.25303	-0.336633	-1.6536	0.101199	0.129535	IL6	Acute_Inflammation	Interleukin-6	Acute-phase driver, fever, CRP induction – ↑↑↑↑ in sepsis, very low in ASD
ENSG00000171552	8.10914	8.5271	0.417967	0.0612242	0.215909	0.417967	1.59831	0.112983	0.143471	BCL2L1	IL6_STAT3	BCL2-like 1 (Bcl-xL)	Anti-apoptotic STAT3 target – ↑ in sepsis (cell survival), low in ASD
ENSG00000124370	1.90685	1.67002	-0.236834	0.0465575	-0.229545	-0.236834	-1.50035	0.136529	0.172005	MCEE	PSA	Methylmalonyl-CoA epimerase	Isomerase
ENSG00000173599	0.882756	0.563266	-0.31949	0.111321	-0.183712	-0.31949	-1.49522	0.13786	0.172325	PC	TCA	Pyruvate carboxylase	Anaplerosis: pyruvate → oxaloacetate (critical in astrocytes)
ENSG00000166123	0.960503	1.22191	0.261407	0.0784043	0.20303	0.261407	1.4374	0.15358	0.190487	GPT2	mSLP	Alanine aminotransferase 2, mitochondrial	Alanine ↔ pyruvate + glutamate ↔ α-KG – important for neuronal amino-acid shuttling & energy
ENSG00000136872	-3.24598	-3.16536	0.0806255	0.0634157	0.0715909	0.0806255	1.42181	0.158048	0.194521	ALDOB	cSLP	Aldolase B (liver/kidney)	Low in brain
ENSG00000167315	4.74877	4.89404	0.145268	0.148682	0.166667	0.145268	1.39856	0.164894	0.201397	ACAA2	FAO	Acetyl-CoA acyltransferase 2	Acetyl-CoA acyltransferase 2
ENSG00000100412	5.55502	5.69552	0.140498	0.200645	0.147727	0.140498	1.35531	0.17823	0.216036	ACO2	TCA	Aconitase 2 (mitochondrial)	Citrate ↔ cis-aconitate ↔ isocitrate
ENSG00000166888	8.68016	8.84003	0.159871	0.158154	0.162879	0.159871	1.32342	0.188573	0.226854	STAT6	IL4_Th2	Signal transducer and activator of transcription 6	Canonical IL-4 transcription factor – phosphorylated/up in Th2 conditions
ENSG00000170950	-3.21062	-3.24598	-0.0353692	0.503234	-0.0227273	-0.0353692	-1.27039	0.206757	0.246874	PGK2	cSLP	Phosphoglycerate kinase 2 (testis-specific)	Direct ATP-producing enzyme (cSLP step 1)
ENSG00000110435	3.32484	3.16596	-0.158882	0.248211	-0.133333	-0.158882	-1.24293	0.216664	0.256787	PDHX	PDH	Pyruvate dehydrogenase protein X component (E3BP)	Anchors E3 to complex – mutations cause severe PDH deficiency + autistic features
ENSG00000111537	-0.269958	-0.642909	-0.372951	0.129913	-0.174621	-0.372951	-1.21527	0.226992	0.267049	IFNG	IFNγ	Interferon-γ	Master type-1 cytokine – ↑↑↑ in viral/bacterial sepsis, usually low in ASD
ENSG00000146701	5.74464	5.84908	0.104442	0.345088	0.109091	0.104442	1.19595	0.234412	0.273766	MDH2	TCA	Malate dehydrogenase 2 (mitochondrial)	Malate → OAA + NADH (core TCA step)
ENSG00000136143	3.66922	3.80911	0.139894	0.136156	0.17197	0.139894	1.12542	0.262978	0.304903	SUCLA2	TCA	Succinate-CoA ligase (ADP-forming) β subunit	Brain/abundant isoform – mutations cause severe mtDNA depletion + ASD
ENSG00000108691	-1.9476	-1.58034	0.367259	0.633658	-0.0537879	0.367259	1.08062	0.282346	0.325003	CCL2	Acute_Inflammation	C-C motif chemokine ligand 2 (MCP-1)	Monocyte/macrophage recruitment – ↑↑↑ in sepsis, low/variable in ASD
ENSG00000152256	5.26447	5.13011	-0.134365	0.160103	-0.162121	-0.134365	-1.036	0.302584	0.345811	PDK1	PDH	Pyruvate dehydrogenase kinase isoform 1	Main brain inhibitor – often strongly ↑↑ in ASD (extra braking of PDH)
ENSG00000102970	-3.24598	-3.20769	0.0382962	0.158384	0.0390152	0.0382962	0.803416	0.423551	0.480626	CCL17	IL4_Th2	C-C motif chemokine ligand 17 (TARC)	Classic Th2 chemokine – attracts CCR4+ Tregs & Th2 cells – ↑ in ASD with allergy/atopy
ENSG00000131828	5.06343	5.01126	-0.0521659	0.067878	-0.210606	-0.0521659	-0.78929	0.431723	0.486448	PDHA1	PDH	Pyruvate dehydrogenase E1 α subunit (somatic)	Core catalytic subunit – X-linked, most frequently mutated / ↓↓↓ in ASD
ENSG00000114054	3.31485	3.39289	0.0780354	0.591799	0.0621212	0.0780354	0.717962	0.474377	0.530771	PCCB	PSA	Propionyl-CoA carboxylase subunit beta	Ligase
ENSG00000162654	6.73055	6.93132	0.200775	0.596354	0.0613636	0.200775	0.69809	0.486666	0.540739	GBP4	IFNγ	Guanylate-binding protein 4	Same family
ENSG00000115361	-3.24598	-3.22903	0.01695	0.158384	0.0390152	0.01695	0.638777	0.52436	0.578605	ACADL	FAO	Long-chain acyl-CoA dehydrogenase	Long/Very Long-Chain Acyl-CoA Dehydrogenases
ENSG00000168291	4.86018	4.91142	0.0512361	0.61473	0.0583333	0.0512361	0.577695	0.564708	0.618858	PDHB	PDH	Pyruvate dehydrogenase E1 β subunit	Core catalytic subunit – frequently ↓ or mutated in ASD
ENSG00000135766	7.53544	7.60564	0.0701965	0.232407	0.137879	0.0701965	0.447749	0.655258	0.713206	EGLN1	HIF1A	Egl-9 family hypoxia-inducible factor 1 (PHD2)	Main oxygen sensor – hydroxylates & degrades HIF-α; often dysregulated in ASD
ENSG00000073578	5.72111	5.68301	-0.0381049	0.749646	-0.0371212	-0.0381049	-0.43843	0.661976	0.71565	SDHA	TCA	Succinate dehydrogenase flavoprotein subunit A	Complex II + TCA: succinate → fumarate + FADH₂
ENSG00000141959	5.83394	5.87699	0.0430538	0.487595	0.080303	0.0430538	0.309748	0.757367	0.81328	PFKL	cSLP	Phosphofructokinase liver	Rate-limiting step
ENSG00000138755	-0.989359	-0.913435	0.075924	0.64014	-0.0541667	0.075924	0.251249	0.802113	0.855587	CXCL9	IFNγ	C-X-C motif chemokine ligand 9 (MIG)	Strongest IFN-γ-inducible chemokine – ↑↑↑↑ in sepsis, low/near-zero in most ASD
ENSG00000143437	6.15974	6.14198	-0.0177634	0.955401	0.00681818	-0.0177634	-0.217121	0.828536	0.877919	ARNT	HIF1A	Aryl hydrocarbon receptor nuclear translocator	HIF-1β – obligatory dimerisation partner
ENSG00000091483	4.31732	4.33758	0.0202643	0.794948	0.030303	0.0202643	0.178788	0.858449	0.897725	FH	TCA	Fumarate hydratase	Fumarate → malate
ENSG00000101365	5.30858	5.32415	0.015568	0.856417	-0.0212121	0.015568	0.180634	0.857003	0.897725	IDH3B	TCA	Isocitrate dehydrogenase 3 (NAD⁺) β subunit	Main TCA catalytic enzyme
ENSG00000067057	4.40008	4.41848	0.0183968	0.764659	0.0348485	0.0183968	0.149742	0.881256	0.91559	PFKP	Glycolysis	Phosphofructokinase-1, platelet subunit	3. Fructose-6-P → Fructose-1,6-BP (committed step)
ENSG00000117054	4.12872	4.15181	0.0230891	0.569269	0.0659091	0.0230891	0.139086	0.889649	0.918348	ACADM	FAO	Medium-Chain Acyl-CoA Dehydrogenase	Medium/Short-Chain
ENSG00000004799	4.60715	4.57386	-0.033291	0.508457	0.0765152	-0.033291	-0.121976	0.903152	0.92631	PDK4	PDH	Pyruvate dehydrogenase kinase isoform 4	Muscle/heart, starvation-induced – usually low/unchanged in brain/ASD
ENSG00000127884	4.40976	4.39954	-0.0102155	0.605511	-0.0598485	-0.0102155	-0.0928491	0.926201	0.943899	ECHS1	FAO	Enoyl-CoA Hydratase	Enoyl-CoA Hydratase
ENSG00000115009	-2.32131	-2.30199	0.0193127	0.418221	-0.0882576	0.0193127	0.0770797	0.938707	0.944611	CCL20	IL6_STAT3	C-C motif chemokine ligand 20 (MIP-3α)	Strong STAT3 target – ↑↑ in sepsis, very low in ASD
ENSG00000162692	-2.22588	-2.20737	0.0185136	0.834191	-0.0234848	0.0185136	0.079605	0.936703	0.944611	VCAM1	Acute_Inflammation	Vascular cell adhesion molecule 1	Same endothelial activation pattern as ICAM1
ENSG00000275302	3.48105	3.49073	0.00967405	0.779762	-0.0325758	0.00967405	0.0412074	0.967209	0.967209	CCL4	Acute_Inflammation	C-C motif chemokine ligand 4 (MIP-1β)	Same family, strong sepsis induction

## Sheet: Healthy_vs_Severe_Module
Supplementary Table S2. Module-level summary statistics, effect sizes, and significance metrics for immunometabolic pathways across sepsis severity strata.
Module	Mean logCPM (Healthy)	Mean logCPM (Severe SOFA)	Delta	p_raw	p_adj	Signif
Acute_Inflammation	2.63993	3.45013	0.810202	1.14957e-13	3.67863e-13	***
FAO	3.97338	4.11931	0.145938	0.000484478	0.000553689	***
Glycolysis	6.54684	7.58929	1.04244	3.74826e-16	3.83617e-15	***
HIF1A	4.5444	5.21574	0.671341	5.47976e-12	1.25252e-11	***
IFNγ	5.52654	5.87963	0.353088	0.0658039	0.0658039
IL10	3.12171	4.11472	0.993005	2.95789e-15	1.57754e-14	***
IL4_Th2	3.5402	3.81724	0.277038	1.11629e-06	1.98452e-06	***
IL6_STAT3	6.57866	7.38129	0.802634	7.21144e-15	2.88458e-14	***
OXPHOS	5.06862	5.37868	0.310059	2.51827e-05	3.47045e-05	***
PDH	4.32329	4.04153	-0.281761	2.35998e-07	4.71996e-07	***
PSA	2.93502	2.70359	-0.231434	2.60284e-05	3.47045e-05	***
TCA	5.12885	5.19743	0.0685819	0.0148163	0.015804	*
TNFA_NFKB	5.94778	6.55547	0.607687	1.53066e-12	4.08175e-12	***
cSLP	2.95481	3.21741	0.262599	5.02021e-06	8.03234e-06	***
mSLP	4.111	3.74618	-0.364821	3.27503e-05	4.03081e-05	***
Tau_index	-1.30503	0.524387	1.82942	4.79521e-16	3.83617e-15	***

## Sheet: Healthy_vs_Severe_Gene
ENSG	Mean_g1	Mean_g2	Delta	p_raw_wilcox	Cliff	logFC	T_value	p_raw_limma	p_adj_limma	GeneSymbol	Modules	Enzyme	Category	Signif
ENSG00000143546	8.04657	12.5183	4.47177	7.88073e-17	0.995544	4.47177	19.4302	7.50266e-35	6.00213e-33	S100A8	Acute_Inflammation	S100 calcium-binding protein A8 (calprotectin subunit)	Best blood marker of bacterial inflammation – ↑↑↑↑ in sepsis, normal in ASD	***
ENSG00000163220	10.5106	13.8618	3.35118	6.9461e-17	0.997326	3.35118	19.5881	4.04954e-35	6.00213e-33	S100A9	Acute_Inflammation	S100 calcium-binding protein A9 (calprotectin subunit)	Same as S100A8 – extremely high in sepsis plasma	***
ENSG00000160883	6.03479	9.38071	3.34592	1.1494e-16	0.990196	3.34592	16.8264	3.0522e-30	1.62784e-28	HK3	cSLP	Hexokinase 3	Minor in most tissues	***
ENSG00000184557	4.82764	7.76015	2.93251	3.11419e-16	0.975936	2.93251	15.7263	3.49863e-28	1.39945e-26	SOCS3	IL6_STAT3	Suppressor of cytokine signalling 3	Classic negative-feedback gene – ↑↑↑↑ in sepsis, low in ASD	***
ENSG00000107485	5.12398	2.83335	-2.29063	2.28417e-16	-0.980392	-2.29063	-15.575	6.79593e-28	2.1747e-26	GATA3	IL4_Th2	GATA binding protein 3	Master regulator of Th2 differentiation – frequently ↑ in ASD peripheral blood	***
ENSG00000059804	8.17188	10.4436	2.27173	6.92723e-16	0.964349	2.27173	14.7971	2.16178e-26	5.76474e-25	SLC2A3	Glycolysis	Glucose transporter 3 (GLUT3)	Glucose uptake	***
ENSG00000170525	5.71952	8.61336	2.89384	1.06133e-15	0.958111	2.89384	14.552	6.52841e-26	1.49221e-24	PFKFB3	HIF1A	6-phosphofructo-2-kinase/fructose-2,6-biphosphatase 3	Key glycolytic driver – brain isoform; highly sensitive to HIF activation but variable in ASD	***
ENSG00000077238	7.3059	9.14406	1.83817	1.52666e-15	0.952763	1.83817	14.3237	1.8407e-25	3.6814e-24	IL4R	IL4_Th2	Interleukin-4 receptor α (shared with IL-13)	Constitutive + induced in Th2-skewed states	***
ENSG00000105639	7.52346	9.11125	1.5878	5.76489e-16	0.967023	1.5878	14.0763	5.6972e-25	1.01284e-23	JAK3	IL4_Th2	Janus kinase 3	Lymphocyte-specific – strongly associated with IL-4 pathway	***
ENSG00000159128	7.51399	8.80905	1.29506	2.19067e-14	0.912656	1.29506	12.7373	2.91429e-22	4.66287e-21	IFNGR2	IFNγ	Interferon-γ receptor 2	Chain-2 – induced by IFN-γ	***
ENSG00000027697	7.53777	9.15316	1.61539	3.28242e-14	0.906417	1.61539	12.6895	3.65485e-22	5.31615e-21	IFNGR1	IFNγ	Interferon-γ receptor 1	Chain-1 of receptor – constitutive expression	***
ENSG00000069399	5.19291	7.20324	2.01033	1.84059e-14	0.91533	2.01033	12.6186	5.11275e-22	6.817e-21	BCL3	IL10	B-cell lymphoma 3-encoded protein	IL-10 → stabilises repressive p50/p50 NF-κB homodimers → blocks pro-inflammatory genes	***
ENSG00000111640	9.16302	10.7502	1.5872	1.72259e-15	0.95098	1.5872	12.5859	5.97206e-22	7.35022e-21	GAPDH	Glycolysis	Glyceraldehyde-3-phosphate dehydrogenase	6. GAP → 1,3-Bisphosphoglycerate (NAD⁺ → NADH)	***
ENSG00000117118	5.00464	5.77579	0.771147	1.08844e-14	0.923351	0.771147	11.7762	2.87257e-20	3.28293e-19	SDHB	TCA	Succinate dehydrogenase iron-sulfur subunit B	Complex II + TCA	***
ENSG00000102144	8.2727	9.52407	1.25136	3.14015e-15	0.942068	1.25136	11.1096	7.25876e-19	7.74267e-18	PGK1	Glycolysis	Phosphoglycerate kinase 1	7. 1,3-BPG → 3-PG (substrate-level phosphorylation)	***
ENSG00000243646	2.59566	3.7003	1.10464	3.32187e-13	0.869875	1.10464	10.7461	4.2751e-18	4.2751e-17	IL10RB	IL10	IL-10 receptor β (shared with IL-22/26/28)	Constitutive	***
ENSG00000138413	5.09276	6.05281	0.960052	2.60606e-14	0.909982	0.960052	10.6346	7.37925e-18	6.94517e-17	IDH1	TCA	Isocitrate dehydrogenase 1 (cytosolic/NADP⁺)	Mainly NADPH production (minor TCA role in brain)	***
ENSG00000067225	8.60337	9.71753	1.11416	7.31016e-14	0.893939	1.11416	10.5014	1.41684e-17	1.25941e-16	PKM	Glycolysis	Pyruvate kinase M1/M2	10. PEP → Pyruvate (final rate-limiting step)	***
ENSG00000134333	7.24337	8.84241	1.59904	2.47132e-15	0.945633	1.59904	10.4717	1.63856e-17	1.37984e-16	LDHA	cSLP	Lactate dehydrogenase A (M subunit)	Regenerates NAD⁺ in cytoplasm – critical for glycolysis	***
ENSG00000168610	8.40776	9.33235	0.924591	1.7983e-12	0.842246	0.924591	10.4044	2.27912e-17	1.82329e-16	STAT3	IL6_STAT3	Signal transducer and activator of transcription 3	Principal transcription factor – massively phosphorylated/activated in sepsis, low in ASD	***
ENSG00000138029	6.43174	7.02182	0.590081	3.71016e-13	0.868093	0.590081	10.0528	1.28134e-16	9.7626e-16	HADHB	FAO	Trifunctional Enzyme Subunit Beta	Trifunctional Protein	***
ENSG00000171314	5.39904	6.46917	1.07013	8.6663e-14	0.891266	1.07013	10.015	1.5432e-16	1.12232e-15	PGAM1	Glycolysis	Phosphoglycerate mutase 1	8. 3-Phosphoglycerate → 2-Phosphoglycerate	***
ENSG00000125166	4.85988	3.92088	-0.939	5.76082e-13	-0.860963	-0.939	-9.73044	6.25714e-16	4.35279e-15	GOT2	mSLP	Aspartate aminotransferase, mitochondrial	Malate-aspartate shuttle + transamination to feed OAA/α-KG into TCA/mSLP	***
ENSG00000100906	6.62215	8.00294	1.38079	7.99474e-13	0.855615	1.38079	9.70909	6.95042e-16	4.63361e-15	NFKBIA	TNFA_NFKB	NF-κB inhibitor alpha (IκBα)	Rapidly degraded in sepsis → NF-κB release; stable in ASD	***
ENSG00000096968	5.97468	7.28141	1.30674	2.00072e-11	0.801248	1.30674	9.50014	1.94386e-15	1.24407e-14	JAK2	IFNγ	Janus kinase 2	Secondary kinase – constitutive	***
ENSG00000172340	4.92932	4.11345	-0.815871	2.22761e-12	-0.838681	-0.815871	-9.21235	8.0122e-15	4.93059e-14	SUCLG2	TCA	Succinate-CoA ligase (GDP/ADP-forming) β subunit	Determines GDP vs ADP specificity	***
ENSG00000067182	8.04051	8.97085	0.930335	7.05972e-11	0.778966	0.930335	8.80169	6.0275e-14	3.57185e-13	TNFRSF1A	TNFA_NFKB	TNF receptor superfamily member 1A (TNFR1)	Main signalling receptor – normal in ASD, strongly ↑ in sepsis	***
ENSG00000169021	4.13796	4.91954	0.781573	1.39702e-11	0.807487	0.781573	8.78883	6.42009e-14	3.66862e-13	UQCRFS1	OXPHOS	Ubiquinol-cytochrome c reductase Rieske iron-sulfur	Complex III Rieske protein – often ↓	***
ENSG00000074800	8.29378	9.23146	0.937681	1.70434e-12	0.843137	0.937681	8.70682	9.59888e-14	5.1194e-13	ENO1	Glycolysis	Enolase 1	9. 2-Phosphoglycerate → Phosphoenolpyruvate	***
ENSG00000138796	3.94779	3.00341	-0.944386	5.16243e-13	-0.862745	-0.944386	-8.71168	9.37294e-14	5.1194e-13	HADH	FAO	Hydroxyacyl-CoA Dehydrogenase	Hydroxyacyl-CoA Dehydrogenase	***
ENSG00000172840	3.33804	2.37525	-0.962786	3.16249e-11	-0.793226	-0.962786	-8.4094	4.11506e-13	2.1239e-12	PDP2	PDH	Pyruvate dehydrogenase phosphatase catalytic subunit 2	Cytosolic, Ca²⁺-insensitive isoform – minor role in brain, usually unchanged	***
ENSG00000072778	6.42328	7.20177	0.778491	4.08627e-10	0.746881	0.778491	8.27279	8.01455e-13	3.88584e-12	ACADVL	FAO	Very long-chain acyl-CoA dehydrogenase	Long/Very Long-Chain Acyl-CoA Dehydrogenases	***
ENSG00000176171	3.27245	2.39476	-0.877695	2.65197e-10	-0.754902	-0.877695	-8.279	7.77558e-13	3.88584e-12	BNIP3	HIF1A	BCL2/adenovirus E1B 19kDa interacting protein 3	Mitophagy & cell-death mediator under chronic hypoxia; ↑ in some ASD subgroups	***
ENSG00000090339	5.22614	6.44759	1.22145	2.58161e-11	0.796791	1.22145	8.24874	9.01129e-13	4.24061e-12	ICAM1	Acute_Inflammation	Intercellular adhesion molecule 1	Endothelial activation & leukocyte adhesion – ↑↑↑ in sepsis, low in ASD	***
ENSG00000175198	2.57249	1.62245	-0.950041	3.23325e-12	-0.832442	-0.950041	-8.21264	1.07436e-12	4.91134e-12	PCCA	PSA	Propionyl-CoA carboxylase subunit alpha	Ligase	***
ENSG00000116016	1.86071	3.37996	1.51925	4.08627e-10	0.746881	1.51925	8.07494	2.09894e-12	9.32861e-12	EPAS1	HIF1A	Endothelial PAS domain protein 1 (HIF-2α)	HIF-2α – important in neural stem cells & astrocytes; altered in some ASD subgroups	***
ENSG00000136634	-3.1269	-1.70464	1.42226	1.36689e-11	0.754011	1.42226	8.00904	2.89019e-12	1.24981e-11	IL10	IL10	Interleukin-10	Master anti-inflammatory cytokine – chronically ↑ in many ASD children (blood & brain)	***
ENSG00000111674	4.55789	3.40522	-1.15267	7.41965e-11	-0.778075	-1.15267	-7.90962	4.67908e-12	1.97014e-11	ENO2	cSLP	Enolase 2 (neuron-specific, gamma)	Brain-specific enolase	***
ENSG00000109320	6.67372	7.21486	0.541143	2.18527e-10	0.758467	0.541143	7.83505	6.71098e-12	2.75322e-11	NFKB1	TNFA_NFKB	Nuclear factor NF-κB p105/p50 subunit	Core subunit – mild activation in some ASD, massive in sepsis	***
ENSG00000105397	7.11117	7.98407	0.8729	2.41533e-09	0.713012	0.8729	7.73061	1.11091e-11	4.44362e-11	TYK2	IL6_STAT3	Tyrosine kinase 2	Minor role in IL-6 signalling – constitutive	***
ENSG00000111669	6.85916	7.5942	0.735039	7.57099e-10	0.735294	0.735039	7.58443	2.24431e-11	8.75826e-11	TPI1	Glycolysis	Triosephosphate isomerase	5. DHAP ↔ Glyceraldehyde-3-P	***
ENSG00000150768	4.24409	3.52796	-0.716137	3.37377e-10	-0.750446	-0.716137	-7.53219	2.8835e-11	1.09848e-10	DLAT	PDH	Dihydrolipoamide S-acetyltransferase (E2)	Core lipoamide swinging arm – ↓ in many ASD cohorts	***
ENSG00000140374	4.97618	5.53308	0.556899	3.53959e-10	0.749554	0.556899	7.38403	5.85721e-11	2.17943e-10	ETFA	FAO	Electron Transfer Flavoprotein	Electron Transfer Flavoprotein	***
ENSG00000067992	4.35695	5.11738	0.760421	2.01074e-09	0.716578	0.760421	7.30469	8.54877e-11	3.10865e-10	PDK3	PDH	Pyruvate dehydrogenase kinase isoform 3	Brain-enriched – frequently ↑ in ASD (together with PDK1)	***
ENSG00000164919	2.81426	4.13876	1.3245	1.78935e-08	0.672906	1.3245	7.25478	1.08391e-10	3.85391e-10	COX6C	OXPHOS	Cytochrome c oxidase subunit 6C	Complex IV – ubiquitous isoform, often ↓	***
ENSG00000110955	7.72062	8.20182	0.481208	1.20908e-09	0.726381	0.481208	7.15766	1.71813e-10	5.95787e-10	ATP5F1B	OXPHOS	ATP synthase F1 subunit beta	Complex V catalytic core – strongly ↓ in almost every ASD cohort	***
ENSG00000111716	7.23173	6.1659	-1.06583	1.26664e-09	-0.72549	-1.06583	-7.15376	1.75013e-10	5.95787e-10	LDHB	cSLP	Lactate dehydrogenase B (H subunit)	Minor role in brain	***
ENSG00000112715	3.16348	4.1481	0.984615	1.3899e-09	0.723708	0.984615	7.12189	2.035e-10	6.78333e-10	VEGFA	HIF1A	Vascular endothelial growth factor A	Classic HIF target – neuroprotection/angiogenesis; variable in ASD but often ↑ at protein level	***
ENSG00000159399	6.00709	6.99784	0.990746	1.37876e-08	0.678253	0.990746	6.99993	3.61773e-10	1.1813e-09	HK2	Glycolysis	Hexokinase 2	1. Glucose → Glucose-6-phosphate (cancer isoform)	***
ENSG00000110324	7.82518	7.25997	-0.565205	2.64634e-09	-0.71123	-0.565205	-6.95104	4.55242e-10	1.45677e-09	IL10RA	IL10	IL-10 receptor α	Constitutive + induced	***
ENSG00000178537	4.50372	5.09155	0.587831	8.13835e-09	0.688948	0.587831	6.94525	4.6779e-10	1.46758e-09	SLC25A20	FAO	Carnitine/acylcarnitine translocase	Carnitine Shuttle	***
ENSG00000163541	4.93312	5.42847	0.49535	9.57412e-10	0.730838	0.49535	6.82857	8.08002e-10	2.46753e-09	SUCLG1	TCA	Succinate-CoA ligase (GDP/ADP-forming) α subunit	Substrate-level phosphorylation (succinyl-CoA → succinate + GTP/ATP)	***
ENSG00000213341	5.04109	5.78776	0.746666	8.50639e-09	0.688057	0.746666	6.8261	8.1737e-10	2.46753e-09	CHUK	TNFA_NFKB	Conserved helix-loop-helix ubiquitous kinase (IKKα)	IKK complex – activated in sepsis, quiescent in most ASD	***
ENSG00000157184	3.93566	4.34703	0.411373	3.03369e-09	0.708556	0.411373	6.80686	8.94222e-10	2.64955e-09	CPT2	FAO	Carnitine palmitoyltransferase 2	Carnitine Shuttle	***
ENSG00000166411	4.77969	4.14275	-0.636934	9.57412e-10	-0.730838	-0.636934	-6.56456	2.75324e-09	8.00943e-09	IDH3A	TCA	Isocitrate dehydrogenase 3 (NAD⁺) α subunit	Main TCA catalytic enzyme: isocitrate → α-ketoglutarate + NADH	***
ENSG00000162711	4.77295	5.59009	0.817135	5.45247e-09	0.69697	0.817135	6.50821	3.56926e-09	1.01979e-08	NLRP3	Acute_Inflammation	NLR family pyrin domain containing 3	Major inflammasome platform – strongly activated in sepsis, mostly quiescent in ASD	***
ENSG00000156515	7.05663	7.83885	0.78223	6.23429e-09	0.694296	0.78223	6.4995	3.71527e-09	1.04288e-08	HK1	Glycolysis	Hexokinase 1	1. Glucose → Glucose-6-phosphate (rate-limiting)	***
ENSG00000158864	5.74739	6.14269	0.395303	2.41934e-08	0.666667	0.395303	6.33324	7.95248e-09	2.19379e-08	NDUFS2	OXPHOS	NADH:ubiquinone oxidoreductase iron-sulfur protein 2	Complex I core – pathogenic variants common in mitochondrial ASD	***
ENSG00000171503	3.85971	4.29345	0.433733	2.87102e-08	0.663102	0.433733	6.26217	1.09865e-08	2.97938e-08	ETFDH	FAO	Electron Transfer Flavoprotein	Electron Transfer Flavoprotein	***
ENSG00000010256	5.22524	5.87622	0.650976	1.00831e-07	0.636364	0.650976	6.20793	1.4047e-08	3.74586e-08	UQCRC1	OXPHOS	Ubiquinol-cytochrome c reductase core protein 1	Complex III core – often ↓ in ASD	***
ENSG00000125538	5.63133	6.73902	1.10769	1.71351e-08	0.673797	1.10769	6.127	2.02368e-08	5.30802e-08	IL1B	Acute_Inflammation	Interleukin-1β	Master alarm cytokine – ↑↑↑↑ in sepsis, almost undetectable in ASD	***
ENSG00000100644	7.27393	8.08715	0.813228	5.88549e-08	0.64795	0.813228	6.11213	2.16373e-08	5.58383e-08	HIF1A	HIF1A	Hypoxia-inducible factor 1-alpha	Master regulator – protein stabilised/activated in many ASD brains despite normal or low mRNA	***
ENSG00000091140	5.05198	5.59117	0.539189	7.5542e-08	0.642602	0.539189	6.07233	2.58707e-08	6.57033e-08	DLD	TCA	Dihydrolipoamide dehydrogenase (E3)	Shared E3 for α-KGDH and PDH complexes	***
ENSG00000160712	8.9155	9.55246	0.636954	8.23756e-07	0.589127	0.636954	6.03327	3.08167e-08	7.70417e-08	IL6R	IL6_STAT3	Interleukin-6 receptor α	Membrane-bound receptor – moderate constitutive	***
ENSG00000149925	1.60069	2.44014	0.839449	7.34379e-07	0.5918	0.839449	5.80663	8.42735e-08	2.07442e-07	ALDOA	Glycolysis	Fructose-bisphosphate aldolase A	4. Fructose-1,6-BP → DHAP + GAP	***
ENSG00000172331	5.0669	6.6991	1.6322	7.06721e-07	0.592692	1.6322	5.75167	1.07292e-07	2.60101e-07	BPGM	cSLP	Bisphosphoglycerate mutase (2,3-BPG synthesis)	Modulates GAPDH/PGK step (mainly erythrocytes)	***
ENSG00000162645	8.43827	9.22335	0.785086	4.6164e-07	0.602496	0.785086	5.74264	1.11624e-07	2.66565e-07	GBP2	IFNγ	Guanylate-binding protein 2	Same family	***
ENSG00000105953	6.41777	6.87783	0.460059	4.26946e-07	0.604278	0.460059	5.73019	1.17883e-07	2.77371e-07	OGDH	TCA	Oxoglutarate dehydrogenase (E1)	α-ketoglutarate → succinyl-CoA + NADH	***
ENSG00000166888	8.68016	9.19948	0.519319	1.11629e-06	0.581996	0.519319	5.72138	1.22515e-07	2.84093e-07	STAT6	IL4_Th2	Signal transducer and activator of transcription 6	Canonical IL-4 transcription factor – phosphorylated/up in Th2 conditions	***
ENSG00000118503	6.04729	6.79205	0.744761	2.87949e-07	0.613191	0.744761	5.65495	1.63723e-07	3.74224e-07	TNFAIP3	TNFA_NFKB	TNF-α-induced protein 3 (A20)	Major negative feedback – often ↓/mutated in autoimmune, normal in ASD	***
ENSG00000179091	3.95274	4.56066	0.607923	6.05791e-07	0.596257	0.607923	5.64258	1.72773e-07	3.89348e-07	CYC1	OXPHOS	Cytochrome c1	Complex III – heme protein, ↓ in many cohorts	***
ENSG00000127884	4.40976	3.89169	-0.51807	1.57883e-07	-0.62656	-0.51807	-5.59854	2.09175e-07	4.64834e-07	ECHS1	FAO	Enoyl-CoA Hydratase	Enoyl-CoA Hydratase	***
ENSG00000163739	2.52148	3.35548	0.834001	1.24992e-06	0.579323	0.834001	5.54146	2.6773e-07	5.86805e-07	CXCL1	Acute_Inflammation	C-X-C motif chemokine ligand 1 (GRO-α)	Neutrophil recruitment – massive in sepsis, near-zero in ASD	***
ENSG00000140740	6.02008	6.31008	0.290004	1.39888e-06	0.576649	0.290004	5.47297	3.59451e-07	7.77192e-07	UQCRC2	OXPHOS	Ubiquinol-cytochrome c reductase core protein 2	Complex III core – frequently reduced	***
ENSG00000143252	5.53084	5.99765	0.466803	1.00831e-07	0.636364	0.466803	5.462	3.76756e-07	8.03747e-07	SDHC	TCA	Succinate dehydrogenase complex subunit C	Complex II anchor	***
ENSG00000185338	0.845496	2.18107	1.33558	3.94774e-07	0.606061	1.33558	5.44701	4.01737e-07	8.45762e-07	SOCS1	IL4_Th2	Suppressor of cytokine signalling 1	Negative feedback – ↑ in chronic IL-4/Th2 states	***
ENSG00000234745	11.7089	12.3389	0.629971	2.26587e-06	0.565062	0.629971	5.31292	7.10729e-07	1.47684e-06	HLA-B	IFNγ	Major histocompatibility complex, class I, B	MHC-I induction – ↑ in active IFN-γ states	***
ENSG00000117394	4.73467	5.91173	1.17706	3.37303e-07	0.609626	1.17706	5.22458	1.03107e-06	2.11502e-06	SLC2A1	Glycolysis	Glucose transporter 1 (GLUT1)	Glucose uptake	***
ENSG00000164951	4.79341	4.08851	-0.704899	1.18778e-07	-0.632799	-0.704899	-5.20683	1.11072e-06	2.24957e-06	PDP1	PDH	Pyruvate dehydrogenase phosphatase catalytic subunit 1	Main mitochondrial activator (Ca²⁺-sensitive) – often ↓ in ASD (less de-repression)	***
ENSG00000148672	6.51261	6.22624	-0.28637	1.6858e-06	-0.572193	-0.28637	-5.0703	1.96017e-06	3.92034e-06	GLUD1	mSLP	Glutamate dehydrogenase 1 (ubiquitous)	Glutamate → α-ketoglutarate + NADH/NADPH – major neuronal anaplerosis & reducing power	***
ENSG00000143384	10.6063	11.1111	0.504806	3.63706e-06	0.553476	0.504806	5.0342	2.27487e-06	4.49357e-06	MCL1	IL6_STAT3	Myeloid cell leukaemia 1	Another anti-apoptotic STAT3 target – ↑↑ in sepsis, low in ASD	***
ENSG00000177646	4.04564	3.65683	-0.388819	1.57703e-05	-0.516043	-0.388819	-4.99999	2.61833e-06	5.10893e-06	ACAD9	FAO	Acyl-CoA dehydrogenase family member 9	Long/Very Long-Chain Acyl-CoA Dehydrogenases	***
ENSG00000162434	9.18497	8.8234	-0.36157	8.50787e-06	-0.532086	-0.36157	-4.99481	2.67456e-06	5.15578e-06	JAK1	IFNγ	Janus kinase 1	Main signalling kinase – constitutive	***
ENSG00000163734	-2.54434	-1.58356	0.960779	3.34926e-05	0.487968	0.960779	4.84869	4.84713e-06	9.23262e-06	CXCL3	Acute_Inflammation	C-X-C motif chemokine ligand 3 (GRO-γ)	Same family, same pattern	***
ENSG00000091483	4.31732	3.9425	-0.374822	5.5842e-06	-0.542781	-0.374822	-4.73568	7.62736e-06	1.43574e-05	FH	TCA	Fumarate hydratase	Fumarate → malate	***
ENSG00000108515	2.33085	1.77459	-0.556257	6.22337e-05	-0.47861	-0.556257	-4.63237	1.14856e-05	2.13686e-05	ENO3	cSLP	Enolase 3 (beta, muscle)	Muscle-specific (low in brain)	***
ENSG00000173039	5.99113	6.34541	0.354277	1.74493e-05	0.513369	0.354277	4.57703	1.42721e-05	2.62476e-05	RELA	TNFA_NFKB	RELA proto-oncogene, NF-κB subunit (p65)	Transcriptionally active subunit – strongly ↑ in sepsis, low in ASD	***
ENSG00000109107	3.78663	3.27059	-0.516034	5.02021e-06	-0.545455	-0.516034	-4.47181	2.1482e-05	3.90582e-05	ALDOC	cSLP	Aldolase C (brain-specific)	Predominant aldolase isoform in adult brain	***
ENSG00000125347	8.78835	9.38722	0.59887	0.000147525	0.453654	0.59887	4.23012	5.38152e-05	9.67464e-05	IRF1	IFNγ	Interferon regulatory factor 1	First-wave transcription factor – classic IFN-γ-induced gene	***
ENSG00000146085	3.94589	4.2618	0.315905	9.05485e-05	0.467914	0.315905	4.1591	7.00828e-05	0.000124592	MMUT	PSA	Methylmalonyl-CoA mutase	Isomerase	***
ENSG00000062485	6.68192	6.46384	-0.218079	3.1698e-05	-0.497326	-0.218079	-3.94644	0.000152043	0.000267328	CS	TCA	Citrate synthase	TCA entry: acetyl-CoA + OAA → citrate	***
ENSG00000131143	6.68153	7.03082	0.349284	0.000458116	0.418895	0.349284	3.90639	0.000175426	0.000305089	COX4I1	OXPHOS	Cytochrome c oxidase subunit 4I1	Complex IV (most abundant isoform) – frequently ↓ in ASD	***
ENSG00000168291	4.86018	4.62844	-0.231745	0.000299104	-0.432264	-0.231745	-3.86313	0.000204526	0.000351873	PDHB	PDH	Pyruvate dehydrogenase E1 β subunit	Core catalytic subunit – frequently ↓ or mutated in ASD	***
ENSG00000137265	4.96442	4.15499	-0.809431	0.000171358	-0.449198	-0.809431	-3.84282	0.000219725	0.000374	IRF4	IL4_Th2	Interferon regulatory factor 4	Co-operates with STAT6 for Th2 programme – frequently ↑ in ASD immune cells	***
ENSG00000129521	1.36993	0.751434	-0.618498	0.000152027	-0.452763	-0.618498	-3.82268	0.000235866	0.000397247	EGLN3	HIF1A	Egl-9 family hypoxia-inducible factor 3 (PHD3)	Brain-enriched prolyl hydroxylase – strongly induced by hypoxia	***
ENSG00000146701	5.74464	5.49641	-0.248235	0.000316816	-0.430481	-0.248235	-3.72033	0.000336871	0.000561452	MDH2	TCA	Malate dehydrogenase 2 (mitochondrial)	Malate → OAA + NADH (core TCA step)	***
ENSG00000167863	5.03783	5.35864	0.320806	0.00253616	0.360963	0.320806	3.71279	0.00034575	0.000570309	ATP5PD	OXPHOS	ATP synthase peripheral stalk subunit D (ATP5H)	Complex V stator – frequently ↓	***
ENSG00000105379	3.50227	3.81777	0.315508	0.0011832	0.387701	0.315508	3.68028	0.00038664	0.000631249	ETFB	FAO	Electron Transfer Flavoprotein	Electron Transfer Flavoprotein	***
ENSG00000275302	3.48105	2.75822	-0.722832	8.77883e-05	-0.468806	-0.722832	-3.60174	0.000505192	0.000816472	CCL4	Acute_Inflammation	C-C motif chemokine ligand 4 (MIP-1β)	Same family, strong sepsis induction	***
ENSG00000135766	7.53544	7.99058	0.455143	0.000316816	0.430481	0.455143	3.49641	0.000718892	0.00114392	EGLN1	HIF1A	Egl-9 family hypoxia-inducible factor 1 (PHD2)	Main oxygen sensor – hydroxylates & degrades HIF-α; often dysregulated in ASD	**
ENSG00000167315	4.74877	4.4415	-0.307271	0.000712547	-0.404635	-0.307271	-3.49507	0.0007221	0.00114392	ACAA2	FAO	Acetyl-CoA acyltransferase 2	Acetyl-CoA acyltransferase 2	**
ENSG00000101365	5.30858	5.07852	-0.230054	0.00218564	-0.36631	-0.230054	-3.37126	0.0010835	0.00169961	IDH3B	TCA	Isocitrate dehydrogenase 3 (NAD⁺) β subunit	Main TCA catalytic enzyme	**
ENSG00000122971	2.40626	2.88778	0.48152	0.00814939	0.316399	0.48152	3.36396	0.00110941	0.00172335	ACADS	FAO	Short-Chain Acyl-CoA Dehydrogenase	Medium/Short-Chain	**
ENSG00000110435	3.32484	3.0479	-0.276935	0.000156657	-0.451872	-0.276935	-3.35059	0.00115836	0.00178209	PDHX	PDH	Pyruvate dehydrogenase protein X component (E3BP)	Anchors E3 to complex – mutations cause severe PDH deficiency + autistic features	**
ENSG00000084754	7.36572	7.5522	0.18648	0.00279765	0.357398	0.18648	3.30725	0.00133134	0.00202871	HADHA	FAO	Trifunctional Enzyme Subunit Alpha	Trifunctional Protein	**
ENSG00000104365	6.46823	6.29546	-0.172771	0.00124671	-0.385918	-0.172771	-3.23339	0.00168304	0.00254044	IKBKB	TNFA_NFKB	Inhibitor of κB kinase β (IKKβ)	Main kinase that frees NF-κB – massively active in sepsis	**
ENSG00000162654	6.73055	5.81886	-0.911686	0.00121458	-0.386809	-0.911686	-3.04572	0.00300465	0.00449293	GBP4	IFNγ	Guanylate-binding protein 4	Same family	**
ENSG00000081041	-2.40427	-1.84164	0.562624	0.00777661	0.314617	0.562624	2.89655	0.0046833	0.00693822	CXCL2	Acute_Inflammation	C-X-C motif chemokine ligand 2 (GRO-β)	Same family, same pattern	**
ENSG00000138755	-0.989359	-1.70073	-0.711367	0.00439931	-0.339572	-0.711367	-2.84903	0.00537734	0.00789335	CXCL9	IFNγ	C-X-C motif chemokine ligand 9 (MIG)	Strongest IFN-γ-inducible chemokine – ↑↑↑↑ in sepsis, low/near-zero in most ASD	**
ENSG00000143437	6.15974	6.36059	0.200847	0.0112812	0.30303	0.200847	2.79679	0.00624822	0.00908833	ARNT	HIF1A	Aryl hydrocarbon receptor nuclear translocator	HIF-1β – obligatory dimerisation partner	**
ENSG00000131828	5.06343	4.89696	-0.166467	0.00197725	-0.369875	-0.166467	-2.77732	0.00660452	0.00952003	PDHA1	PDH	Pyruvate dehydrogenase E1 α subunit (somatic)	Core catalytic subunit – X-linked, most frequently mutated / ↓↓↓ in ASD	**
ENSG00000232810	2.6981	3.0344	0.336299	0.0279487	0.262923	0.336299	2.71743	0.00782001	0.0111714	TNF	TNFA_NFKB	Tumor necrosis factor (TNF-α)	Master cytokine – ↑↑↑↑ in sepsis, usually normal/low in ASD brain	*
ENSG00000005882	3.38032	2.9337	-0.446621	0.00315906	-0.352941	-0.446621	-2.67296	0.00885079	0.0125321	PDK2	PDH	Pyruvate dehydrogenase kinase isoform 2	Broadly expressed inhibitor – mild-to-moderate ↑ in some ASD subgroups	*
ENSG00000167792	5.32217	5.03979	-0.282376	0.0376551	-0.248663	-0.282376	-2.64727	0.0095008	0.0133345	NDUFV1	OXPHOS	NADH:ubiquinone oxidoreductase flavoprotein 1	Complex I core subunit – frequently mutated/down in ASD	*
ENSG00000105679	-3.08775	-3.23411	-0.146363	0.0127962	-0.172014	-0.146363	-2.60927	0.0105419	0.014667	GAPDHS	cSLP	Spermatogenic GAPDH (rarely expressed in brain)	Same as GAPDH (usually ignore in brain)	*
ENSG00000111537	-0.269958	-0.918061	-0.648103	0.00762147	-0.319073	-0.648103	-2.60519	0.0106597	0.014703	IFNG	IFNγ	Interferon-γ	Master type-1 cytokine – ↑↑↑ in viral/bacterial sepsis, usually low in ASD	*
ENSG00000136244	-2.05543	-2.47138	-0.415949	0.0176005	-0.278966	-0.415949	-2.48644	0.0146493	0.0200332	IL6	Acute_Inflammation	Interleukin-6	Acute-phase driver, fever, CRP induction – ↑↑↑↑ in sepsis, very low in ASD	*
ENSG00000171552	8.10914	8.79172	0.682583	0.0390497	0.246881	0.682583	2.43738	0.0166562	0.0225847	BCL2L1	IL6_STAT3	BCL2-like 1 (Bcl-xL)	Anti-apoptotic STAT3 target – ↑ in sepsis (cell survival), low in ASD	*
ENSG00000139180	2.83167	2.60383	-0.22784	0.0151249	-0.290553	-0.22784	-2.39268	0.018694	0.0251347	NDUFA9	OXPHOS	NADH:ubiquinone oxidoreductase subunit A9	Complex I accessory – often ↓ in ASD brain cohorts	*
ENSG00000110090	6.31906	6.56235	0.243286	0.0221627	0.273619	0.243286	2.10211	0.0381903	0.0509204	CPT1A	FAO	Carnitine palmitoyltransferase 1A	Carnitine Shuttle
ENSG00000067829	4.8774	5.0569	0.1795	0.031301	0.257576	0.1795	1.97024	0.051724	0.0683953	IDH3G	TCA	Isocitrate dehydrogenase 3 (NAD⁺) γ subunit	Main TCA catalytic enzyme
ENSG00000067057	4.40008	4.1526	-0.247479	0.104522	-0.194296	-0.247479	-1.93333	0.0561743	0.0734527	PFKP	Glycolysis	Phosphofructokinase-1, platelet subunit	3. Fructose-6-P → Fructose-1,6-BP (committed step)
ENSG00000169248	-2.62649	-2.159	0.467489	0.280721	0.121212	0.467489	1.93099	0.0564667	0.0734527	CXCL11	IFNγ	C-X-C motif chemokine ligand 11 (I-TAC)	Same CXCR3-ligand family – same pattern
ENSG00000124370	1.90685	1.715	-0.191853	0.0509727	-0.233512	-0.191853	-1.90442	0.0598831	0.0772685	MCEE	PSA	Methylmalonyl-CoA epimerase	Isomerase
ENSG00000152234	7.59695	7.49109	-0.105852	0.0536912	-0.230838	-0.105852	-1.89979	0.0604961	0.0774351	ATP5F1A	OXPHOS	ATP synthase F1 subunit alpha	Complex V catalytic core – almost always ↓ in ASD
ENSG00000204370	5.44283	5.5796	0.136777	0.0054332	0.332442	0.136777	1.87133	0.064379	0.0817512	SDHD	TCA	Succinate dehydrogenase complex subunit D	Complex II anchor
ENSG00000117054	4.12872	3.92613	-0.202593	0.0458805	-0.238859	-0.202593	-1.77316	0.0794083	0.100042	ACADM	FAO	Medium-Chain Acyl-CoA Dehydrogenase	Medium/Short-Chain
ENSG00000178741	4.59284	4.7061	0.11326	0.0647152	0.221034	0.11326	1.74771	0.0837463	0.104683	COX5A	OXPHOS	Cytochrome c oxidase subunit 5A	Complex IV – ↓ in brain ASD studies
ENSG00000136872	-3.24598	-3.13581	0.110173	0.26958	0.0601604	0.110173	1.67754	0.0967264	0.119971	ALDOB	cSLP	Aldolase B (liver/kidney)	Low in brain
ENSG00000113520	-2.32217	-2.62235	-0.300184	0.0408477	-0.233066	-0.300184	-1.64938	0.102375	0.126	IL4	IL4 Th2	Interleukin-4	Master Th2 cytokine – ↑ in many ASD children with atopy, GI issues, chronic LPS exposure
ENSG00000073578	5.72111	5.61603	-0.105088	0.152928	-0.171123	-0.105088	-1.55658	0.122898	0.150104	SDHA	TCA	Succinate dehydrogenase flavoprotein subunit A	Complex II + TCA: succinate → fumarate + FADH₂
ENSG00000014641	4.99861	5.1292	0.13059	0.216752	0.14795	0.13059	1.47753	0.142844	0.173144	MDH1	TCA	Malate dehydrogenase 1 (cytosolic)	OAA ↔ malate (shuttle function, minor direct TCA)
ENSG00000152556	2.91601	2.72021	-0.195806	0.0605078	-0.224599	-0.195806	-1.45893	0.147883	0.177905	PFKM	cSLP	Phosphofructokinase muscle	Rate-limiting step
ENSG00000205560	-0.210915	0.0459753	0.256891	0.0318914	0.256684	0.256891	1.44878	0.150693	0.179932	CPT1B	FAO	Carnitine palmitoyltransferase 1B	Carnitine Shuttle
ENSG00000162692	-2.22588	-2.52342	-0.297542	0.155753	-0.161319	-0.297542	-1.4026	0.163998	0.194367	VCAM1	Acute_Inflammation	Vascular cell adhesion molecule 1	Same endothelial activation pattern as ICAM1
ENSG00000100412	5.55502	5.66306	0.108035	0.14047	0.176471	0.108035	1.35512	0.178595	0.210112	ACO2	TCA	Aconitase 2 (mitochondrial)	Citrate ↔ cis-aconitate ↔ isocitrate
ENSG00000073756	5.06562	4.80375	-0.261865	0.14047	-0.176471	-0.261865	-1.32178	0.189419	0.221219	PTGS2	Acute_Inflammation	Prostaglandin-endoperoxide synthase 2 (COX-2)	Inducible cyclooxygenase – prostaglandin storm in sepsis, low in ASD brain
ENSG00000114054	3.31485	3.2151	-0.099746	0.0881173	-0.2041	-0.099746	-1.25651	0.212015	0.245814	PCCB	PSA	Propionyl-CoA carboxylase subunit beta	Ligase
ENSG00000108691	-1.9476	-2.2442	-0.296599	0.0241287	-0.262923	-0.296599	-1.15995	0.248977	0.286593	CCL2	Acute_Inflammation	C-C motif chemokine ligand 2 (MCP-1)	Monocyte/macrophage recruitment – ↑↑↑ in sepsis, low/variable in ASD
ENSG00000102970	-3.24598	-3.19969	0.0462936	0.643407	0.021836	0.0462936	1.14438	0.255344	0.291822	CCL17	IL4_Th2	C-C motif chemokine ligand 17 (TARC)	Classic Th2 chemokine – attracts CCR4+ Tregs & Th2 cells – ↑ in ASD with allergy/atopy
ENSG00000169245	-0.197249	0.237024	0.434273	0.506476	0.0797683	0.434273	1.09024	0.278365	0.315875	CXCL10	IFNγ	C-X-C motif chemokine ligand 10 (IP-10)	Same family – one of the best markers of active IFN-γ response
ENSG00000119689	5.86336	5.82742	-0.0359435	0.372452	-0.106952	-0.0359435	-1.05065	0.296086	0.333618	DLST	TCA	Dihydrolipoamide S-succinyltransferase (E2)	Part of α-KGDH complex
ENSG00000117228	7.02641	7.33491	0.308502	0.819928	0.0276292	0.308502	0.998134	0.320752	0.358883	GBP1	IFNγ	Guanylate-binding protein 1	Classic IFN-γ-inducible GTPase – ↑↑↑ in sepsis, very low in ASD
ENSG00000141959	5.83394	5.94613	0.112193	0.170826	0.163993	0.112193	0.975961	0.331564	0.368404	PFKL	cSLP	Phosphofructokinase liver	Rate-limiting step
ENSG00000136143	3.66922	3.58335	-0.0858725	0.364503	-0.108734	-0.0858725	-0.908874	0.365718	0.403551	SUCLA2	TCA	Succinate-CoA ligase (ADP-forming) β subunit	Brain/abundant isoform – mutations cause severe mtDNA depletion + ASD
ENSG00000134352	6.97311	6.85163	-0.121479	0.230958	-0.143494	-0.121479	-0.80977	0.420097	0.460381	IL6ST	IL6_STAT3	Interleukin-6 signal transducer (gp130)	Shared co-receptor – strongly induced in sepsis
ENSG00000115415	8.55069	8.68527	0.134581	0.997022	-0.000891266	0.134581	0.738481	0.462043	0.502904	STAT1	IFNγ	Signal transducer and activator of transcription 1	Principal transcription factor – strongly phosphorylated/up in active IFN-γ response
ENSG00000159199	2.9715	2.88487	-0.0866295	0.504143	-0.0802139	-0.0866295	-0.696483	0.487828	0.527382	ATP5MC1	OXPHOS	ATP synthase membrane subunit c isoform 1	Complex V ring – highly expressed, often ↓
ENSG00000166123	0.960503	1.09141	0.130907	0.557952	0.07041	0.130907	0.653879	0.51477	0.552773	GPT2	mSLP	Alanine aminotransferase 2, mitochondrial	Alanine ↔ pyruvate + glutamate ↔ α-KG – important for neuronal amino-acid shuttling & energy
ENSG00000131473	6.56704	6.53795	-0.0290948	0.706242	-0.0454545	-0.0290948	-0.533272	0.595091	0.634764	ACLY	TCA	ATP-citrate lyase	Citrate (mito → cyto) → acetyl-CoA + OAA (lipids, epigenetics)
ENSG00000170950	-3.21062	-3.22599	-0.0153773	0.430824	-0.040107	-0.0153773	-0.457004	0.648712	0.682855	PGK2	cSLP	Phosphoglycerate kinase 2 (testis-specific)	Direct ATP-producing enzyme (cSLP step 1)
ENSG00000182054	5.46483	5.41567	-0.0491536	0.722951	-0.0427807	-0.0491536	-0.459644	0.646822	0.682855	IDH2	TCA	Isocitrate dehydrogenase 2 (mitochondrial/NADP⁺)	Reductive carboxylation + NADPH (important in ASD mitochondria)
ENSG00000173599	0.882756	0.973206	0.0904493	0.235345	0.142157	0.0904493	0.415364	0.678812	0.709869	PC	TCA	Pyruvate carboxylase	Anaplerosis: pyruvate → oxaloacetate (critical in astrocytes)
ENSG00000135390	5.37659	5.41534	0.038754	0.59359	0.0641711	0.038754	0.387914	0.698948	0.72618	ATP5MC2	OXPHOS	ATP synthase membrane subunit c isoform 2	Complex V ring – brain isoform
ENSG00000004799	4.60715	4.52698	-0.0801719	0.955361	-0.00713012	-0.0801719	-0.316847	0.752056	0.776315	PDK4	PDH	Pyruvate dehydrogenase kinase isoform 4	Muscle/heart, starvation-induced – usually low/unchanged in brain/ASD
ENSG00000102962	-2.87581	-2.8866	-0.0107844	0.402376	-0.0828877	-0.0107844	-0.0791592	0.937073	0.9611	CCL22	IL4_Th2	C-C motif chemokine ligand 22 (MDC)	Same CCR4 axis – strongly induced by IL-4, ↑ in many ASD blood studies
ENSG00000115009	-2.32131	-2.3331	-0.0117949	0.777033	-0.0329768	-0.0117949	-0.0565318	0.955037	0.967126	CCL20	IL6_STAT3	C-C motif chemokine ligand 20 (MIP-3α)	Strong STAT3 target – ↑↑ in sepsis, very low in ASD
ENSG00000152256	5.26447	5.27221	0.0077348	0.866639	0.0204991	0.0077348	0.0639233	0.949166	0.967126	PDK1	PDH	Pyruvate dehydrogenase kinase isoform 1	Main brain inhibitor – often strongly ↑↑ in ASD (extra braking of PDH)
ENSG00000169429	2.88079	2.89177	0.010983	0.837379	0.0249554	0.010983	0.0338801	0.973044	0.979164	CXCL8	Acute_Inflammation	C-X-C motif chemokine ligand 8 (IL-8)	Strongest neutrophil chemoattractant – ↑↑↑↑↑ in sepsis, negligible in ASD
ENSG00000115361	-3.24598	-3.24598	0	0.657399	-0.0164884	5.35402e-16	4.52558e-14	1	1	ACADL	FAO	Long-chain acyl-CoA dehydrogenase	Long/Very Long-Chain Acyl-CoA Dehydrogenases

## Sheet: Sample_TauAxis
Sample	Group	Acute_Inflammation	FAO	Glycolysis	HIF1A	IFNγ	IL10	IL4_Th2	IL6_STAT3	OXPHOS	PDH	PSA	TCA	TNFA_NFKB	cSLP	mSLP	tau_raw	tau_z
GSM5608946	Medium_SOFA	2.86787	4.48625	6.98939	4.41932	5.81068	2.69126	3.24021	6.14176	5.80357	4.62226	3.52007	5.58273	5.75784	2.71391	4.77248	69.4196	-0.475576
GSM5608947	Medium_SOFA	3.75387	4.47924	7.3483	5.18147	6.99055	3.7868	3.80355	7.08552	5.87702	4.83594	3.52179	5.66373	6.57666	3.15276	4.81455	76.8718	2.01832
GSM5608948	Low_SOFA	3.84169	4.10509	7.05696	5.09879	6.23609	3.82135	3.52375	7.32751	5.392	4.40556	2.78994	5.18817	5.9749	3.13145	3.96938	71.8626	0.342002
GSM5608949	Low_SOFA	4.44094	3.87292	6.91026	5.29151	5.97824	3.29268	3.41472	6.7971	5.1513	4.3195	3.04341	5.14383	6.33835	2.98703	3.73791	70.7197	-0.0404877
GSM5608950	Low_SOFA	2.99511	3.89039	6.4758	4.48839	7.12314	2.90502	3.30766	6.36367	5.5401	4.24879	3.36378	5.33687	5.873	2.89951	4.02018	68.8314	-0.672411
GSM5608951	Low_SOFA	0.0556769	3.88388	5.95487	2.89509	4.50378	2.57697	3.24601	4.75022	5.27641	4.32803	3.28121	5.1008	5.45208	2.74415	4.3624	58.4116	-4.15946
GSM5608952	Low_SOFA	2.57	4.53922	6.91757	4.31099	6.58549	2.97667	3.38739	6.24713	6.09329	4.99173	3.69505	5.83427	5.73003	3.21918	4.56546	71.6635	0.275343
GSM5608953	Low_SOFA	4.25992	3.67113	6.91436	5.02668	7.41855	3.70815	3.4209	6.93185	5.1429	4.01498	2.57066	4.81867	6.15931	2.77126	2.76361	69.5929	-0.417565
GSM5608954	Low_SOFA	3.22629	3.59266	7.38542	4.89361	5.40599	4.23635	3.33346	7.00081	5.23591	4.16143	3.21178	5.13744	6.58114	2.89919	2.00792	68.3094	-0.847105
GSM5608955	Low_SOFA	3.19904	3.95261	6.45834	4.80514	7.05777	3.63922	3.84374	6.42713	5.15656	4.44523	2.79391	4.92322	6.00992	2.86419	3.96401	69.54	-0.43527
GSM5608956	Low_SOFA	3.10088	4.0855	7.38283	4.8041	6.86357	3.3615	3.96415	7.13011	5.10045	4.26325	3.08229	5.40446	6.77051	2.81417	3.85468	71.9825	0.382097
GSM5608957	Medium_SOFA	4.17208	4.49816	7.66164	4.4283	7.50575	4.05167	4.0122	6.91453	5.82906	4.11499	2.76832	5.64642	6.57851	3.23765	4.51442	75.9337	1.7044
GSM5608958	Low_SOFA	3.76681	3.9648	6.21701	4.38405	7.51168	3.21227	3.49818	6.18843	5.49386	4.34402	3.2584	5.08455	5.58062	2.87582	3.85919	69.2397	-0.535785
GSM5608959	Medium_SOFA	3.64058	4.08196	6.52054	3.52405	8.00374	2.52125	2.80854	5.85308	6.06272	4.44279	3.47283	5.42414	5.53171	2.82827	3.84282	68.559	-0.763568
GSM5608960	Low_SOFA	3.89258	3.92425	6.97511	5.06006	7.9799	3.4061	3.63467	7.2152	5.39364	4.13834	2.44112	5.11422	6.52739	2.74927	3.51855	71.9704	0.378057
GSM5608961	Low_SOFA	3.30673	3.90818	6.04947	4.23795	5.42972	2.82882	2.97239	6.23251	5.42963	4.46171	3.14571	4.9589	5.38821	2.68876	3.68132	64.72	-2.04831
GSM5608962	Low_SOFA	2.85907	4.33941	6.56425	4.05627	6.11429	2.91297	3.16978	6.10886	5.61265	4.40085	3.09696	5.29056	5.71062	3.05295	4.02187	67.3114	-1.1811
GSM5608963	Low_SOFA	3.20814	3.92394	6.5904	4.54782	5.80724	3.16638	3.60171	6.60878	5.38716	4.37356	3.0152	5.18378	5.84199	3.11045	3.91641	68.283	-0.855953
GSM5608964	Medium_SOFA	3.04856	4.36712	6.83247	3.86876	7.67373	3.56112	3.67974	6.16046	5.60881	4.2782	2.85996	5.34965	5.88832	2.94071	4.75427	70.8719	0.010432
GSM5608965	Low_SOFA	3.98186	4.13879	6.7354	4.33042	6.77718	2.977	3.29649	6.17274	5.76867	4.17558	3.47168	5.30404	5.8004	2.94461	4.2091	70.0839	-0.253248
GSM5608966	Low_SOFA	3.44301	3.93728	7.13461	4.59121	6.15816	3.21992	3.35118	6.77486	5.19063	4.04471	2.23177	5.23079	6.30848	2.61586	3.25318	67.4856	-1.12278
GSM5608967	Low_SOFA	3.10433	3.95671	6.42083	4.60479	5.4388	2.6116	3.31132	6.18317	5.17082	4.30382	3.09782	5.15414	5.77555	2.93561	3.82602	65.8953	-1.65499
GSM5608968	Low_SOFA	3.10306	4.09326	6.83101	4.31395	6.30077	3.20947	3.36751	6.41679	5.42193	4.54573	3.40031	5.30916	5.74757	3.04322	3.42238	68.5261	-0.774584
GSM5608969	Low_SOFA	3.49883	3.68558	6.87045	4.25785	5.33817	3.84248	3.56546	6.75337	5.31367	4.63222	3.24869	5.08248	5.73407	2.76322	4.51574	69.1023	-0.581769
GSM5608970	Low_SOFA	3.67122	4.18032	6.68626	4.50673	7.17011	3.12037	3.29276	6.27653	5.36502	4.54233	3.21366	5.36117	5.95743	2.63071	4.33365	70.3083	-0.178168
GSM5608971	Low_SOFA	3.38105	4.01741	7.00139	5.04848	6.17507	3.81221	3.45854	6.96383	5.11965	4.30011	2.76188	5.04681	6.14036	2.67985	3.81216	69.7188	-0.375451
GSM5608972	Low_SOFA	2.74696	4.4103	7.21872	4.04285	5.95936	3.3202	3.44645	6.09481	6.24636	4.33731	3.125	5.54266	5.77947	3.18085	4.38354	69.8348	-0.336609
GSM5608973	Low_SOFA	2.61891	4.94026	7.01617	3.79871	6.30686	2.61175	3.57904	5.93876	6.90942	5.04936	4.64618	6.24936	5.28658	3.17222	5.65561	73.7792	0.983378
GSM5608974	Low_SOFA	2.34199	4.66139	6.47097	3.57771	5.61019	2.95481	3.61615	5.79965	6.19144	4.5063	3.73885	5.64602	5.32885	3.05201	4.89294	68.3893	-0.820377
GSM5608975	Low_SOFA	2.48065	4.2125	6.94083	3.8826	5.60382	2.96535	3.31747	6.45531	5.8129	3.90084	2.86835	5.10141	5.72068	3.46658	4.38574	67.115	-1.2468
GSM5608976	Low_SOFA	2.60798	4.20678	6.66835	3.90765	5.99722	2.99697	3.25233	6.09985	6.0795	4.03041	3.2434	5.26713	5.62565	3.10785	3.6717	66.7628	-1.36469
GSM5608977	Low_SOFA	2.5707	4.35925	7.28725	4.32252	4.7727	3.77915	3.63583	6.83125	5.66578	3.96803	2.67413	5.112	5.98972	3.28624	3.4817	67.7363	-1.03891
GSM5608978	Low_SOFA	3.51299	4.57885	7.59131	4.03635	6.88137	4.13985	3.73024	7.23304	6.38135	3.59927	2.50204	5.36661	6.75533	3.06417	3.6525	73.0253	0.731081
GSM5608979	Low_SOFA	3.3543	4.39901	7.04344	4.28967	6.094	3.7334	3.61369	6.95038	5.59744	4.14116	3.30873	5.41788	6.13414	3.08302	3.8915	71.0518	0.0706362
GSM5608980	Low_SOFA	3.38239	4.4081	6.92556	4.34817	6.17275	4.00325	3.70785	6.67442	5.94472	4.16235	3.00297	5.33439	6.29375	3.17818	4.26759	71.8064	0.323187
GSM5608981	Low_SOFA	2.78687	4.43279	7.08117	3.71296	6.01411	3.55723	3.60237	6.4352	6.12353	3.91132	3.02705	5.36259	5.80782	3.52231	3.97942	69.3567	-0.49661
GSM5608982	Medium_SOFA	3.931	4.61487	7.75993	4.97396	7.24898	4.05405	3.78675	6.94144	5.99695	4.19247	3.11237	5.64186	6.38735	3.00845	4.42471	76.0751	1.75173
GSM5608983	Low_SOFA	3.63954	4.64126	7.26155	4.21652	6.2116	3.62266	3.91565	6.6538	6.152	4.07608	2.98198	5.48289	5.8209	3.33039	4.69904	72.7058	0.624184
GSM5608984	Low_SOFA	1.89051	4.80095	7.01065	3.64102	5.53577	3.0127	3.5973	5.69459	6.64145	4.51389	3.86969	6.05912	5.51628	3.2538	5.22302	70.2607	-0.19408
GSM5608985	Low_SOFA	3.75358	4.34252	6.80261	4.78072	7.77357	3.72864	4.15935	6.86583	5.46837	4.12955	2.72331	5.34674	6.44116	3.01536	4.39312	73.7244	0.965061
GSM5608986	Low_SOFA	3.0114	4.73566	7.22398	3.86474	6.89832	3.87389	4.00102	6.29938	6.56208	4.3506	3.60063	5.85594	5.8462	3.35423	5.24898	74.7271	1.30059
GSM5608987	Medium_SOFA	1.95822	4.94609	6.78922	3.4465	5.68588	2.69359	3.45426	5.59793	6.68473	4.79747	4.11128	5.98449	5.30316	3.19288	5.33394	69.9796	-0.288155
GSM5608988	Medium_SOFA	2.15728	4.75054	6.62773	3.67333	5.30177	2.94075	3.3357	5.73691	6.91385	4.95012	4.55062	6.04925	5.13507	3.1011	5.17066	70.3947	-0.149258
GSM5608989	Low_SOFA	2.98066	4.32879	6.92364	3.87897	6.13903	3.58796	4.16967	6.19805	6.4155	3.86997	3.30433	5.59581	5.66698	3.35204	4.75249	71.1639	0.108168
GSM5608990	Medium_SOFA	2.16448	4.82439	6.67371	3.48692	5.33541	2.83252	3.55819	5.69087	6.71481	4.68027	3.97491	5.89936	5.27605	3.19868	5.18058	69.4912	-0.451626
GSM5608991	Low_SOFA	2.35313	4.70669	6.858	3.64215	5.91681	2.82934	3.42521	5.67669	6.72797	4.36922	3.88062	5.93726	5.47579	3.1306	5.08512	70.0146	-0.27645
GSM5608992	Low_SOFA	3.46103	3.99364	7.33315	4.63166	5.98434	4.16956	3.81298	7.28915	5.45585	3.71552	2.64799	5.03936	6.68438	3.02968	3.4992	70.7475	-0.0311892
GSM5608993	Low_SOFA	3.58685	4.29492	7.02319	3.95125	6.68297	3.91535	4.00048	6.78466	5.95973	4.12912	3.23673	5.47362	6.16291	3.19638	4.1562	72.5544	0.573485
GSM5608994	Low_SOFA	2.48485	4.71746	7.06354	3.69008	5.16941	2.97291	3.51062	5.92593	6.84842	4.39245	3.9596	5.99168	5.34019	3.33521	5.13566	70.538	-0.101292
GSM5608995	Low_SOFA	2.97929	4.38704	7.06625	4.24646	6.83932	3.86162	4.06978	6.92043	5.70987	3.92509	2.53971	5.3011	6.29573	3.24509	4.03701	71.4238	0.195146
GSM5608996	Low_SOFA	3.17483	4.48977	7.40102	4.17618	6.2976	3.86067	3.98928	6.83703	6.03468	3.45417	2.64185	5.26142	6.3658	3.15508	3.91809	71.0575	0.0725519
GSM5608997	Low_SOFA	1.95402	4.71902	6.73117	3.45548	4.95002	3.10572	3.48905	5.56785	6.28023	4.16557	3.25621	5.60632	5.53213	3.16869	4.59319	66.5747	-1.42764
GSM5608998	Low_SOFA	2.49656	4.5771	6.77092	3.90617	5.09372	2.74645	3.09033	5.8592	5.91652	4.24802	3.27984	5.46384	5.4172	3.19612	4.57306	66.635	-1.40744
GSM5608999	Low_SOFA	2.53496	4.74338	7.13226	4.06606	5.4848	3.7493	4.02782	6.56236	6.37431	4.25729	3.3996	5.46347	5.85656	3.28092	5.03455	71.9676	0.377138
GSM5609000	Low_SOFA	2.78442	4.5429	7.29259	3.68533	5.97231	3.38307	3.57394	6.26943	6.02464	3.81249	2.69834	5.37341	5.81511	3.38277	4.1595	68.7702	-0.692885
GSM5609001	Low_SOFA	2.72314	4.48966	7.55867	3.91163	6.01068	3.56986	3.62079	6.4238	6.24023	3.65497	2.67706	5.36891	6.06571	3.49055	3.93611	69.7418	-0.367756
GSM5609002	Low_SOFA	2.24578	4.38265	7.24793	3.63435	4.87524	3.30176	3.61901	6.15954	6.0497	3.17333	2.33883	5.12307	5.46448	3.47463	3.66333	64.7536	-2.03706
GSM5609003	Low_SOFA	2.37651	4.47016	7.47869	3.24122	5.20721	3.63509	3.98828	6.51286	6.56135	2.9322	2.51861	5.16984	5.854	3.24881	4.0087	67.2035	-1.21719
GSM5609004	Medium_SOFA	3.16081	4.5644	7.16497	3.77798	6.21485	3.86545	3.90624	6.64762	5.92353	3.47821	2.42976	5.1938	6.03333	3.25226	4.26159	69.8748	-0.323243
GSM5609005	Medium_SOFA	2.97669	4.43636	7.80311	4.19076	5.49944	4.27833	3.98306	7.05899	5.84295	3.43349	1.84474	5.19429	6.63957	3.21285	3.68193	70.0766	-0.255717
GSM5609006	Low_SOFA	1.96053	4.92542	6.99073	3.38337	5.73706	3.11942	3.52321	5.71881	6.81713	4.51608	4.22921	6.05449	5.26672	3.48359	5.38319	71.1089	0.0897728
GSM5609007	Low_SOFA	1.32827	5.12393	6.73065	3.07254	4.48786	2.73886	3.52291	5.34308	7.03345	4.36466	4.2923	6.02779	4.94212	3.44715	5.21193	67.6675	-1.06192
GSM5609008	Low_SOFA	2.3116	4.83197	6.8068	3.61002	5.42703	2.92442	3.28905	5.76098	6.77876	4.65217	4.34432	5.98629	5.09942	3.15926	5.39566	70.3778	-0.154924
GSM5609009	Low_SOFA	2.78539	4.72517	7.32002	4.03647	6.52476	2.92563	3.91537	6.23239	6.44629	4.07464	3.37562	5.74787	5.63675	3.43182	5.1323	72.3105	0.491872
GSM5609010	Low_SOFA	1.95997	4.72394	6.83228	3.1532	5.14321	2.86699	3.35966	5.26775	6.64405	4.36634	3.89018	5.89046	5.23731	2.94868	4.93427	67.2183	-1.21225
GSM5609011	Low_SOFA	2.26035	4.2813	7.48607	4.27646	4.88874	3.70735	3.91457	6.66751	5.59078	3.59822	2.34554	5.18954	6.02378	3.38192	3.88967	67.5018	-1.11736
GSM5609012	Medium_SOFA	2.68709	4.68754	6.80032	3.56612	5.61582	2.65794	3.52618	5.84928	6.50526	4.49758	3.82717	5.81443	5.29701	3.22733	5.07103	69.6301	-0.405126
GSM5609013	Low_SOFA	3.11854	4.16863	7.69311	5.14183	6.23886	4.36917	3.74199	7.50093	5.38582	4.16564	2.66088	5.41309	6.65008	2.84757	3.87635	72.9725	0.713418
GSM5609014	Low_SOFA	3.06746	4.43385	7.481	4.34583	6.55324	4.10396	3.98134	6.86429	5.93902	4.04487	2.98326	5.59503	6.48068	3.13951	4.30089	73.3142	0.827781
GSM5609015	Low_SOFA	3.22263	4.42408	7.87396	4.76387	6.63234	4.55797	3.93179	7.63161	5.76979	3.49109	2.44503	5.32878	6.9367	3.12905	3.36681	73.5055	0.891791
GSM5609016	Medium_SOFA	3.11965	4.42983	7.69449	4.32394	6.97219	4.04836	4.38213	7.00223	6.39559	3.99783	3.02773	5.48985	6.43386	3.3558	4.24247	74.9159	1.3638
GSM5609017	Low_SOFA	3.24335	4.05134	7.12696	4.5485	6.44336	3.78486	3.82148	6.75265	5.61989	4.35222	2.70134	5.2553	6.39232	2.87658	3.64318	70.6134	-0.0760786
GSM5609018	Low_SOFA	3.07193	4.05785	7.6575	4.40983	6.21034	4.2176	3.73221	7.39427	6.21961	3.5527	2.67403	5.33963	6.37092	3.1165	3.52136	71.5463	0.236124
GSM5609019	Low_SOFA	2.94978	4.26008	7.81803	4.85026	7.41411	4.09318	4.15686	7.84502	6.07142	3.82654	2.49864	5.47916	6.85406	2.9213	3.34364	74.3821	1.18514
GSM5609020	Low_SOFA	3.41478	4.11297	7.07326	5.02112	6.69867	4.02919	3.84177	6.76297	5.61528	4.2331	2.4971	5.11873	6.24281	3.15368	3.08203	70.8975	0.019003
GSM5609021	Low_SOFA	4.48276	3.92378	7.91879	5.75067	6.82785	4.41617	3.92429	8.57902	4.92233	3.68156	2.31607	4.98966	7.65091	3.4656	3.15529	76.0048	1.72818
GSM5609022	Low_SOFA	2.81903	4.33712	7.65702	5.11229	7.11912	3.67556	3.60989	7.03441	5.59295	4.3531	2.69657	5.42325	6.45909	3.07181	3.60823	72.5694	0.578536
GSM5609023	Medium_SOFA	2.96557	4.46968	7.84644	4.78374	5.34759	4.52158	3.58495	7.26469	5.81645	3.8292	2.49446	5.41707	6.83	3.39848	4.23199	72.8019	0.656324
GSM5609024	Low_SOFA	4.20397	3.98313	7.7537	5.52282	7.65835	4.81466	4.08953	8.23734	5.58469	4.10363	2.33647	5.21545	7.47505	2.99015	3.78194	77.7509	2.31252
GSM5609025	Low_SOFA	2.48317	4.17517	7.88451	5.0459	6.03876	4.23136	3.68586	7.6632	5.81541	3.73459	3.33603	5.33463	6.00264	3.69237	3.61042	72.734	0.633608
GSM5609026	Low_SOFA	3.26306	4.37372	7.79697	5.35454	7.27489	4.7372	3.93691	7.60664	5.76695	3.99703	2.68167	5.43193	6.69416	2.95337	3.92191	75.791	1.65663
GSM5609027	Medium_SOFA	3.00603	4.01956	7.65844	5.09154	6.78982	4.14974	4.14864	7.70928	5.65713	3.63015	3.09427	5.25705	6.71163	3.49115	3.88155	74.296	1.15633
GSM5609028	Low_SOFA	1.94516	4.57902	8.06301	4.88594	4.43731	3.83906	3.44101	6.89285	5.76716	4.19054	2.88283	5.84047	6.14265	3.51138	4.92804	71.3465	0.169257
GSM5609029	Low_SOFA	2.61654	4.12694	7.0866	4.79507	4.99993	3.58437	4.04932	7.14012	5.63498	4.07477	2.8845	5.26866	6.12956	3.34863	3.95601	69.696	-0.383065
GSM5609030	Low_SOFA	2.86552	4.24072	7.78429	4.02026	5.34646	4.12192	3.80974	6.84038	6.13382	3.46987	2.49486	5.2482	6.15575	3.48441	3.25265	69.2689	-0.526018
GSM5609031	Low_SOFA	3.21518	3.93428	7.51497	5.07289	6.71363	3.56692	3.7811	7.57201	5.33505	3.89562	2.33954	5.15952	6.45648	3.06865	4.16096	71.7868	0.316622
GSM5609032	Medium_SOFA	3.21767	4.71449	7.76936	4.52606	7.0922	4.43407	4.00382	7.27176	5.69273	4.07548	2.65132	5.64822	6.61866	2.86143	4.38048	74.9578	1.37779
GSM5609033	Low_SOFA	3.03116	4.65067	7.65323	4.25542	6.44938	3.51704	3.38654	6.8591	6.08459	4.06555	2.95146	5.58585	5.65545	3.29755	3.97621	71.4192	0.193605
GSM5609034	Medium_SOFA	3.42994	4.314	7.62875	5.14673	5.97108	4.34929	3.478	7.18713	5.5624	4.26437	2.90932	5.38194	6.11205	3.11072	3.66232	72.508	0.557984
GSM5609035	Low_SOFA	2.34386	4.31665	7.5335	4.29561	5.34881	3.54523	3.6633	6.72498	6.01993	3.90305	2.9941	5.47244	5.80218	3.64536	3.64254	69.2515	-0.531816
GSM5609036	Low_SOFA	2.89025	4.56543	7.49447	4.54248	5.15549	4.51677	3.51136	6.92767	5.806	4.23139	3.005	5.56713	6.31463	3.05931	3.93934	71.5267	0.229586
GSM5609037	Low_SOFA	2.89899	4.28179	7.43573	4.57479	6.20912	4.04208	3.91906	6.93497	5.81441	4.19901	2.86163	5.52684	6.37028	3.05814	3.95174	72.0786	0.414268
GSM5609038	Low_SOFA	2.68641	3.96091	6.66971	4.20381	5.29436	3.42071	3.50233	6.67583	5.70383	3.68058	2.89	4.95077	5.63134	3.0447	3.49351	65.8088	-1.68395
GSM5609039	Low_SOFA	2.41264	3.88294	7.24679	5.27025	6.53174	3.4321	3.79559	7.25155	5.21331	4.20125	2.67396	5.12115	5.93741	3.26472	3.70954	69.9449	-0.299766
GSM5609040	Low_SOFA	4.392	4.23008	8.24619	5.4421	6.40734	4.66367	4.73175	8.14158	6.3246	3.36753	2.62378	5.51167	7.86591	3.64346	3.62101	79.2127	2.80172
GSM5609041	Medium_SOFA	3.96911	4.05323	8.27066	6.36481	5.29778	5.3832	3.61714	8.54444	5.39739	3.76492	1.60912	5.13024	7.68864	3.40158	2.82437	75.3166	1.49789
GSM5609042	Low_SOFA	3.21638	4.02058	7.57781	5.02176	5.23301	3.83532	3.86853	6.99643	5.71423	4.2437	2.812	5.44182	6.22151	3.13144	3.80795	71.1425	0.100992
GSM5609043	Low_SOFA	3.15564	4.545	7.7217	3.97593	5.91293	4.24546	3.59635	6.78006	6.72483	3.74908	3.33378	5.5783	6.14639	3.33476	3.92985	72.7301	0.632286
GSM5609044	Low_SOFA	2.20715	4.28015	7.20692	3.5847	5.05583	3.54253	3.46955	6.40041	6.01822	3.54432	2.64305	5.13811	5.51798	3.30777	4.07811	65.9948	-1.6217
GSM5609045	Medium_SOFA	3.08255	4.53004	6.84335	4.03585	6.03902	3.33177	3.5192	5.75958	6.29634	4.60954	3.69499	5.51607	5.6915	3.2155	4.91324	71.0785	0.0795962
GSM5609046	Low_SOFA	3.57249	4.18044	7.19013	4.91685	7.46228	3.68284	3.79356	7.05669	5.72453	3.71283	2.92189	5.2972	6.20247	3.0789	4.02742	72.8205	0.662559
GSM5609047	Medium_SOFA	3.47951	4.06154	7.74719	5.33452	7.4381	4.63854	4.25147	7.72771	5.65283	3.99161	2.27154	5.12589	6.73353	3.38338	3.29141	75.1288	1.43502
GSM5609048	Low_SOFA	2.89167	4.2212	7.52175	4.91521	5.58091	3.88115	3.65522	7.07784	5.82809	4.27034	3.19896	5.56394	6.2521	3.10238	3.94543	71.9062	0.356578
GSM5609049	Low_SOFA	3.20031	4.17983	7.75062	5.08172	5.42498	4.53773	3.72707	7.77545	5.67346	3.9662	2.92158	5.34669	6.35907	3.13611	3.90409	72.9849	0.717572
GSM5609050	Low_SOFA	3.78189	4.22897	8.14381	5.57861	5.63601	5.06942	4.16179	7.99162	5.75977	3.83542	2.05133	5.36192	7.10425	3.76425	3.87886	76.3479	1.84302
GSM5609051	Low_SOFA	2.43848	4.16026	8.08667	4.17005	6.47268	3.39624	3.62891	6.89805	6.12807	3.82243	3.0064	5.75575	5.9561	3.57893	4.35124	71.8503	0.337861
GSM5609052	Low_SOFA	3.05295	4.1264	7.35058	4.94458	6.69723	3.39969	3.88507	7.02814	5.4963	4.45663	2.93628	5.47278	6.34197	3.17911	4.21637	72.5841	0.583431
GSM5609053	Medium_SOFA	2.68021	4.19688	7.58043	5.09317	6.9718	4.42881	3.74541	7.5027	5.35035	4.37853	2.68525	5.22365	6.9894	2.47588	3.47682	72.7793	0.648761
GSM5609054	Medium_SOFA	2.77709	4.42657	7.29945	4.42991	6.48105	4.1022	3.83049	6.53825	5.82994	4.4142	3.2118	5.60344	6.22829	2.9245	4.19206	72.2892	0.484766
GSM5609055	Low_SOFA	3.47957	3.81944	7.96201	5.27939	5.81535	4.62104	3.96661	7.62282	5.54793	3.49305	2.30913	4.77062	6.97511	2.97009	3.1377	71.7699	0.310953
GSM5609056	Low_SOFA	2.61693	4.12638	6.56764	4.31515	6.8973	3.40946	3.76304	6.46847	5.4988	4.22226	3.27363	5.22576	5.97766	3.09536	4.13979	69.5976	-0.415994
GSM5609057	Low_SOFA	3.27647	4.27858	7.57711	4.57615	5.98622	4.22784	3.88898	7.01755	5.97367	4.04109	2.84546	5.49496	6.24552	3.13192	4.2318	72.7933	0.653459
GSM5609058	Low_SOFA	3.20649	4.06574	7.75514	5.33705	5.67675	5.2542	4.03312	7.47668	5.68976	4.04661	1.80131	5.23109	6.55796	3.167	3.55878	72.8577	0.674994
GSM5609059	Low_SOFA	3.31954	3.92497	8.33785	5.74412	5.01956	5.31027	3.77091	8.24733	5.79604	3.2304	2.3384	4.99375	6.63824	3.28903	3.00877	72.9692	0.712313
GSM5609060	Medium_SOFA	3.36795	4.12064	7.35381	4.95755	8.00855	4.07653	4.47752	7.67794	5.46298	4.20013	2.23896	5.40193	6.95217	2.93371	4.00306	75.2334	1.47005
GSM5609061	Low_SOFA	3.16738	4.329	7.96976	4.96426	4.94879	4.62304	3.80589	7.19836	6.38105	3.75481	2.84608	5.33085	6.05929	3.28912	3.49875	72.1664	0.443663
GSM5609062	Low_SOFA	2.63953	4.59862	7.39009	3.99394	5.90262	3.91724	4.03568	6.42308	6.13846	3.829	3.01452	5.48688	5.98589	3.25052	4.28643	70.8925	0.0173437
GSM5609063	Medium_SOFA	5.34294	3.46335	8.12011	5.45294	5.32356	5.74251	4.21159	8.95071	5.38618	2.32807	2.02682	4.67917	8.46394	3.5392	1.74351	74.7746	1.3165
GSM5609064	Low_SOFA	3.0536	4.13117	7.82658	4.71392	6.14198	4.70991	3.97158	7.65057	5.83859	3.65775	2.64321	5.28657	6.63724	3.36748	3.39263	73.0228	0.73025
GSM5609065	Low_SOFA	2.66977	3.94708	7.76025	4.76338	6.43508	4.17746	4.23759	7.78781	5.75778	2.90136	2.12276	5.0775	6.71392	3.10092	3.05161	70.5043	-0.112576
GSM5609066	Low_SOFA	2.61448	4.40745	7.66352	4.22214	5.96596	4.00425	3.49074	6.35502	6.03402	4.16176	2.88257	5.6923	5.95539	3.59511	4.91312	71.9578	0.373861
GSM5609067	Low_SOFA	3.02421	4.20412	7.82491	4.77227	6.81298	4.51557	4.18635	7.35528	6.05013	4.16865	2.63546	5.53787	6.58041	3.3353	4.3807	75.3842	1.52051
GSM5609068	Low_SOFA	3.18335	3.89162	7.69489	5.10594	5.59199	4.10757	4.08062	7.59765	5.34175	4.08044	2.69649	5.34846	6.48108	3.16207	2.47336	70.8373	-0.00113993
GSM5609069	Low_SOFA	3.00705	3.70953	6.79594	4.33692	5.47456	3.80323	3.23351	6.88448	5.41949	4.0438	-0.218223	5.06717	6.24387	2.72225	2.89094	63.4145	-2.48519
GSM5609070	Low_SOFA	3.53676	4.19783	7.35031	4.88493	6.89796	4.79327	4.0473	7.55606	5.82714	3.98792	2.66685	5.35441	6.56511	2.9971	3.97984	74.6428	1.27239
GSM5609071	Low_SOFA	4.2816	4.05503	8.25234	5.74975	6.07008	5.22555	3.90794	8.21731	5.73814	3.77375	2.19786	5.11815	7.43881	3.28044	2.94316	76.2499	1.81021
GSM5609072	Low_SOFA	2.17252	4.18661	7.1329	3.82639	5.6308	3.61	3.54173	6.76081	5.80633	3.98855	2.7661	5.38812	5.35616	3.63326	3.98245	67.7827	-1.02336
GSM5609073	Low_SOFA	3.11329	4.1867	8.08268	4.15983	4.71167	4.61537	3.61748	7.05326	6.49482	3.30388	2.31516	5.16484	6.25769	3.20171	3.39893	69.6773	-0.389329
GSM5609074	Medium_SOFA	3.75795	4.25233	7.53705	5.56671	5.80122	4.36744	3.78107	7.6226	5.87309	3.81597	2.91924	5.17793	6.49137	2.98895	3.61925	73.5722	0.914101
GSM5609075	Low_SOFA	2.8484	4.34023	7.39159	4.00298	5.47097	3.88442	3.8347	6.7962	6.4394	3.66317	2.92458	5.25393	5.85646	3.50341	4.36383	70.5743	-0.0891646
GSM5609076	Medium_SOFA	3.39136	4.81126	7.30587	3.97433	6.44633	3.83566	3.64024	6.72213	6.35233	3.83323	3.3054	5.4555	6.05121	3.3963	3.86842	72.3896	0.518334
GSM5609077	Low_SOFA	3.77158	4.28821	8.01204	5.36009	5.0727	5.09697	3.92225	7.97087	6.06347	3.61777	2.85629	5.51475	6.87869	3.12074	3.39389	74.9403	1.37196
GSM5609078	Low_SOFA	2.85931	4.65276	7.76609	4.50986	6.92104	4.10735	4.14894	6.95535	6.35785	4.19681	3.03264	5.8897	6.54352	2.97637	4.42863	75.3462	1.50779
GSM5609079	Low_SOFA	3.11006	4.23338	7.19321	4.46236	6.26566	3.23929	3.46729	6.4225	5.97765	4.23645	3.0026	5.30861	5.58509	3.32095	4.67189	70.497	-0.115016
GSM5609080	Low_SOFA	3.14913	3.51745	7.00585	3.67084	6.93537	4.03757	4.15049	7.92675	4.80789	4.37086	0.643903	5.18086	6.56961	3.1048	2.54396	67.6153	-1.07937
GSM5609081	Low_SOFA	2.34579	4.18991	7.99665	5.33741	4.75728	4.78781	3.52362	7.99986	5.57535	4.30343	3.01441	5.59034	6.68139	3.12737	4.04764	73.2783	0.815747
GSM5609082	Low_SOFA	2.38307	4.61253	7.52268	4.072	5.0453	3.82389	3.68633	6.47259	6.24463	3.68218	2.72263	5.57581	5.84886	3.24433	3.88449	68.8213	-0.67579
GSM5609083	Low_SOFA	3.10102	4.49125	7.33732	4.41489	6.61051	3.91323	3.88447	6.60412	6.24312	4.17006	2.76678	5.59321	6.23995	3.183	4.00404	72.557	0.574361
GSM5609084	Low_SOFA	2.80912	4.35656	7.40846	3.75541	5.90945	4.3822	3.7042	7.07179	6.00573	4.00893	2.90577	5.36268	5.81662	3.65607	3.72923	70.8822	0.0138982
GSM5609085	Low_SOFA	2.7497	4.27706	8.13931	4.5769	6.10974	4.06559	3.9053	7.47143	5.98163	3.39385	2.4078	5.32976	6.62334	3.09633	3.63512	71.7629	0.308611
GSM5609086	Low_SOFA	3.44419	4.22541	7.92781	5.01854	6.22148	5.52227	4.00156	7.54281	6.29524	3.0712	1.91004	5.13888	6.91084	2.98163	3.44742	73.6593	0.943267
GSM5609087	Low_SOFA	2.76396	4.36906	7.51842	3.1027	6.24924	3.12273	4.38114	5.76379	7.00228	3.41442	2.89347	5.76658	5.54164	3.57733	5.17726	70.644	-0.0658193
GSM5609088	Low_SOFA	3.06125	4.46098	7.15605	4.32394	6.98852	3.98969	4.04834	6.5518	6.19672	4.03113	2.94558	5.66856	6.33377	3.31864	4.6209	73.6959	0.955504
GSM5609089	Low_SOFA	3.26444	4.39622	7.60048	4.95369	6.98778	4.0004	4.17687	7.07408	6.26218	3.74983	2.65044	5.57468	6.65875	3.06809	4.55958	74.9775	1.3844
GSM5609090	Low_SOFA	2.61121	4.31101	7.84981	4.60988	4.79223	4.0715	3.9334	7.31896	5.57808	3.53236	2.30989	5.25796	6.28426	3.4549	3.76862	69.6841	-0.387063
GSM5609091	Medium_SOFA	3.05779	4.05214	7.34257	5.16974	6.27767	3.62053	3.82854	7.45269	5.13374	4.10799	2.63153	5.06572	6.53357	3.2301	3.95043	71.4547	0.205495
GSM5609092	Low_SOFA	2.94452	4.38976	8.04883	4.94928	5.61026	4.15845	3.47676	7.53103	5.70046	3.96241	2.56785	5.60957	6.57571	3.02361	3.79037	72.3389	0.501373
GSM5609093	Low_SOFA	3.39153	4.49804	7.96623	4.89669	7.00533	4.30861	4.05455	7.2503	6.08815	3.72108	2.63897	5.4217	6.67917	3.00578	4.50739	75.4335	1.53701
GSM5609094	Severe_SOFA	2.80699	4.52875	7.66161	4.40973	5.77617	3.38599	4.08886	6.77775	6.31406	3.73162	3.3829	5.36345	6.38392	3.55107	4.48242	72.6453	0.603913
GSM5609095	Low_SOFA	3.35366	4.25899	7.71661	4.65391	5.23289	3.94819	3.95692	7.18157	5.77646	3.95804	2.73596	5.42745	6.71065	3.29518	3.90135	72.1078	0.424059
GSM5609096	Low_SOFA	2.68341	4.59998	8.32884	4.81263	4.88223	4.57743	3.74384	7.31797	6.2804	3.80197	3.38641	5.73736	5.96125	3.7162	4.02608	73.856	1.00908
GSM5609097	Low_SOFA	3.52384	3.95536	7.53504	5.3741	5.52946	4.22293	4.2206	7.6457	5.21178	3.64185	2.63068	5.05479	6.63236	3.48616	3.52624	72.1909	0.45185
GSM5609098	Low_SOFA	2.74258	4.42635	7.83435	4.22601	5.5529	3.76355	3.87449	7.22202	5.85047	3.87699	2.7314	5.42009	6.06678	3.57774	4.03452	71.2002	0.120325
GSM5609099	Low_SOFA	3.01803	4.39403	7.39834	4.75813	7.09933	4.25664	4.32053	7.05487	5.50838	4.4002	2.76887	5.42818	6.58982	3.01726	4.77874	74.7913	1.32211
GSM5609100	Medium_SOFA	2.88009	3.96062	8.223	5.27751	6.27392	4.18627	3.98519	7.97664	5.39813	4.15034	2.48753	5.34889	6.58085	3.57197	3.07638	73.3773	0.848892
GSM5609101	Severe_SOFA	3.58889	4.17906	8.50014	5.53578	4.74476	4.12918	3.73952	8.07508	5.74326	3.34999	2.96572	5.41723	6.51147	3.90599	3.98694	74.373	1.1821
GSM5609102	Low_SOFA	4.06447	4.05316	7.31179	4.89057	7.53981	3.67616	3.91843	7.32843	5.60529	4.35181	2.50554	5.38763	6.47176	3.15314	3.9739	74.2319	1.13488
GSM5609103	Low_SOFA	3.20512	3.85014	8.12826	5.18555	5.8888	3.91324	4.03857	7.4782	5.34381	3.46848	2.23429	4.89914	6.68063	3.29648	2.53081	70.1415	-0.233986
GSM5609104	Low_SOFA	3.42929	3.98762	7.2749	5.38661	7.51903	4.50275	4.2678	7.74581	5.28921	3.95105	2.30098	5.02199	6.97317	2.35025	3.68157	73.682	0.950864
GSM5609105	Medium_SOFA	2.60814	4.4577	7.8266	4.78458	5.08618	4.29743	3.878	6.74564	5.7106	4.11407	2.83921	5.56099	6.12033	3.29613	4.39123	71.7168	0.293201
GSM5609106	Low_SOFA	3.30999	4.15237	6.93961	4.54157	7.1374	4.32133	3.95178	7.04015	5.42847	4.34253	2.53813	5.19127	6.56373	2.86611	3.83391	72.1584	0.440964
GSM5609107	Low_SOFA	2.9162	4.61122	8.01562	4.46889	7.19721	4.25631	3.85972	6.77283	6.45815	3.85471	2.76426	5.95697	6.49892	3.35877	4.89951	75.8893	1.68953
GSM5609108	Low_SOFA	2.72871	4.47474	7.15712	4.37273	6.38031	3.75589	3.95872	6.42072	5.56151	4.41993	2.82282	5.59461	6.20607	3.10763	4.77689	71.7384	0.300423
GSM5609109	Low_SOFA	4.66104	3.79395	7.29334	5.40512	9.07892	4.21986	4.52036	8.86688	5.22489	3.39651	1.81798	4.92891	8.17648	2.89177	3.01817	77.2942	2.15968
GSM5609110	Low_SOFA	3.29405	4.13067	7.12056	4.52759	7.035	3.69948	3.83571	7.07684	5.74521	4.11747	2.78782	5.33025	6.41016	3.39995	4.19989	72.7106	0.625789
GSM5609111	Low_SOFA	2.66311	4.45727	7.53133	3.59354	5.89827	3.96326	3.94861	6.89818	6.22825	3.57452	2.72753	5.52449	6.23185	3.34095	4.04548	70.6266	-0.0716352
GSM5609112	Low_SOFA	3.08825	4.44391	7.38545	4.55262	6.79381	3.73743	4.31719	6.60994	5.87409	4.5685	3.07042	5.71783	6.3913	3.1118	4.84181	74.5044	1.22606
GSM5609113	Low_SOFA	4.00265	3.84537	7.66515	5.67903	7.03171	4.79369	4.33682	8.57421	4.89068	3.89542	2.01774	4.88036	7.31951	3.10698	3.60151	75.6408	1.60639
GSM5609114	Medium_SOFA	3.19759	4.46696	7.88508	5.16414	5.7872	5.1346	4.10668	7.39525	6.23452	3.48025	2.87435	5.38725	6.55872	3.26779	3.69531	74.6357	1.27002
GSM5609115	Low_SOFA	3.26489	4.47674	8.24167	4.75252	7.21556	4.02294	3.76422	7.63815	6.47942	3.81481	2.55711	5.69584	6.9259	3.13676	3.70128	75.6878	1.62211
GSM5609116	Low_SOFA	3.11116	4.29828	7.12766	4.64053	6.16249	4.3144	3.90917	6.80117	5.81174	4.29505	2.84516	5.44593	6.37154	3.12397	4.2344	72.4927	0.552846
GSM5609117	Low_SOFA	3.18538	4.40421	7.77414	5.01229	5.2569	4.37654	4.12049	7.51975	5.58269	3.66389	2.59056	5.22182	6.20772	3.59803	3.59172	72.1062	0.423494
GSM5609118	Low_SOFA	3.16665	4.47657	7.90836	4.50306	6.48387	4.65231	3.8271	7.21589	6.07243	3.89381	2.82836	5.59565	6.49675	2.97019	4.20385	74.2949	1.15595
GSM5609119	Low_SOFA	2.44745	4.76437	7.33322	4.08522	6.02887	3.88371	3.50463	6.69442	6.27335	3.95381	2.96461	5.59814	5.67985	3.33857	4.30685	70.8571	0.00548334
GSM5609120	Low_SOFA	2.85204	4.2559	7.449	5.32678	5.31328	4.10844	3.4283	7.2506	5.08206	4.15924	2.45821	5.07467	6.30883	2.71817	3.36678	69.1523	-0.565019
GSM5609121	Low_SOFA	3.02703	4.09964	7.31417	5.32923	5.80768	4.24017	3.87528	7.81399	5.07438	3.84493	2.26148	4.93577	6.4423	3.09833	3.44695	70.6113	-0.0767603
GSM5609122	Low_SOFA	3.50944	4.22082	7.09071	4.98177	6.06322	3.73567	3.69945	6.88592	5.43468	4.18316	2.75365	5.18559	6.18365	2.86414	3.6855	70.4774	-0.121588
GSM5609123	Low_SOFA	5.49699	3.75581	7.56643	5.21063	6.4889	4.58986	4.18437	7.95232	5.54124	3.35653	2.41034	4.86049	7.95798	3.54332	3.81625	76.7314	1.97136
GSM5609124	Low_SOFA	2.47135	4.20722	7.36198	4.46107	5.0754	4.11197	3.80339	6.68893	5.63577	3.81564	2.51092	5.45895	6.1315	3.06749	4.43192	69.2335	-0.537855
GSM5609125	Severe_SOFA	3.6456	4.34526	7.16824	4.61132	7.26477	3.57315	3.94145	6.56332	5.56298	4.01297	2.84148	5.26574	5.85633	3.30662	4.38985	72.3491	0.504785
GSM5609126	Low_SOFA	3.79531	4.32384	8.28118	5.30707	5.13094	4.86076	3.71402	8.17901	5.60262	3.35111	2.25396	5.31033	7.57156	3.66858	3.07339	74.4237	1.19906
GSM5609127	Low_SOFA	2.48264	4.42229	7.86311	4.68141	5.16279	4.04926	4.32787	7.208	5.99707	3.30693	2.23194	5.25839	6.20383	3.48574	3.91074	70.592	-0.0832251
GSM5609128	Low_SOFA	3.73407	4.18687	7.3167	5.6018	8.19858	3.70705	4.03622	7.46573	5.04454	4.35449	2.75208	5.42472	6.68405	2.85031	4.78297	76.1402	1.7735
GSM5609129	Medium_SOFA	3.77034	3.89266	7.54012	5.48355	6.41428	3.77514	3.53242	7.73695	4.94573	4.2403	2.79554	5.16801	7.01794	2.71989	4.07745	73.1103	0.759544
GSM5609130	Low_SOFA	3.52291	3.58101	6.51917	5.35417	7.77853	3.25648	3.82504	7.3877	4.55177	4.07712	2.85991	4.85276	6.42323	2.36775	4.17581	70.5334	-0.102848
GSM5609131	Medium_SOFA	3.11085	3.816	8.16038	5.61891	5.64433	3.57287	4.01929	7.38823	5.15225	3.9084	2.4108	5.22403	6.61441	3.46547	3.45134	71.5576	0.239905
GSM5609132	Low_SOFA	1.66251	3.79369	5.78066	3.75977	5.73714	2.42753	3.95112	5.33738	4.96819	4.31899	3.20174	4.96857	5.42732	2.45484	5.32377	63.1132	-2.58603
GSM5609133	Low_SOFA	2.98613	4.15954	7.38733	5.32467	5.70224	3.30485	2.91947	6.91669	4.9761	4.49671	2.81327	5.12812	5.81363	3.10766	3.51577	68.5522	-0.765857
GSM5609134	Medium_SOFA	2.67042	4.00231	6.49422	4.74116	5.18082	2.94664	3.15043	6.51656	4.97121	4.5727	3.15009	5.05523	5.69615	3.12633	4.13822	66.4125	-1.48191
GSM5609135	Medium_SOFA	2.76441	3.94214	6.65292	4.98082	6.90348	3.49523	3.63877	6.62539	4.82599	4.1106	2.55059	5.0063	6.1988	2.58416	3.79232	68.0719	-0.926577
GSM5609136	Low_SOFA	2.63857	4.05178	7.07986	4.92973	6.32624	3.10593	4.01447	6.76062	5.11085	4.33597	3.1319	5.28446	6.32867	2.84556	4.42631	70.3709	-0.157201
GSM5609137	Low_SOFA	2.30952	3.9355	7.16454	3.89819	5.7047	2.26743	2.95161	6.32229	5.35745	3.78038	2.73012	5.35089	5.25533	3.36164	3.75314	64.1427	-2.2415
GSM5609138	Low_SOFA	3.54999	4.06299	7.1243	5.69359	5.79821	3.30998	3.22918	7.03025	4.48322	4.22942	2.87689	4.96913	6.13515	2.86428	2.43137	67.788	-1.02161
GSM5609139	Medium_SOFA	3.13876	3.80631	6.39387	5.04526	7.10241	3.20047	3.85406	7.33739	4.67821	4.49031	2.42503	4.84244	6.07811	2.67286	3.92256	68.988	-0.619994
GSM5609140	Low_SOFA	2.81335	3.97279	7.10267	5.17021	6.02784	3.67222	3.43784	7.17644	4.76988	4.25061	2.70032	5.20422	6.2786	2.76875	4.24783	69.5936	-0.417357
GSM5609141	Low_SOFA	3.40783	3.82244	7.22546	5.40241	7.32112	4.43128	4.1602	7.69736	4.97294	4.36743	2.57702	4.98551	6.74449	2.76479	3.90376	73.784	0.985007
GSM5609142	Low_SOFA	3.3723	4.09639	7.10535	5.11858	6.39877	3.32809	3.63753	6.75221	5.27518	4.76596	3.01157	5.40751	6.19236	2.74885	4.50753	71.7182	0.293659
GSM5609143	Low_SOFA	2.89091	4.04294	7.63149	5.97309	6.05787	4.10667	3.6657	7.82497	4.88846	4.22532	2.45045	5.13129	6.66329	2.92805	3.69606	72.1766	0.447056
GSM5609144	Low_SOFA	2.86955	3.76865	6.71375	4.87948	6.40244	3.0224	3.46964	7.07894	4.67434	4.33423	2.2922	4.77437	5.95179	2.74851	4.13839	67.1187	-1.24558
GSM5609145	Low_SOFA	2.86084	3.86733	6.98465	5.14945	7.26681	3.01884	3.91358	6.84881	4.78276	4.21203	2.42464	5.07778	6.04666	2.94325	3.85395	69.2514	-0.531866
GSM5609146	Low_SOFA	2.9773	4.12531	6.78536	4.48537	6.30722	3.08724	3.57145	6.48414	5.18144	4.49687	3.01818	5.32088	6.02778	2.92367	4.22369	69.0159	-0.610668
GSM5609147	Low_SOFA	2.54797	4.2586	7.5971	4.93512	5.13282	4.0908	3.17227	7.22193	5.20011	3.9813	2.98845	5.40596	6.25429	3.09376	3.94108	69.8215	-0.341065
GSM5609148	Low_SOFA	4.33156	3.62173	7.48183	5.66	7.99387	3.95926	3.79215	8.56834	4.40936	3.71313	2.39538	4.7321	7.88658	2.94452	1.7618	73.2516	0.80683
GSM5609149	Medium_SOFA	2.8828	3.94353	6.9012	5.08684	6.10361	3.53935	3.28852	7.37429	4.75005	4.20004	2.80021	5.04275	6.33773	2.68333	3.61594	68.5502	-0.766523
GSM5609150	Medium_SOFA	5.75304	3.6133	7.02049	5.47203	7.91132	3.70017	3.5823	8.37186	4.76995	3.45256	2.4515	4.52613	8.03619	3.00296	3.18299	74.8468	1.34066
GSM5609151	Low_SOFA	1.29052	4.56122	7.44858	3.82963	4.90836	2.22353	2.82045	6.21169	5.53708	4.30467	3.42515	5.66938	4.88064	3.66048	4.04238	64.8138	-2.01693
GSM5609152	Low_SOFA	2.96737	4.53868	7.56338	4.60334	6.5777	3.62168	3.99318	6.84999	5.80041	3.72189	2.7264	5.46729	6.01614	3.29296	4.70206	72.4425	0.536048
GSM5609153	Low_SOFA	3.21414	4.02738	6.95869	4.56743	6.07442	2.91022	3.21607	6.45821	5.16155	4.23704	3.05597	5.25251	5.99195	3.02184	4.00511	68.1526	-0.899594
GSM5609154	Medium_SOFA	3.45129	3.97628	7.17351	5.49076	6.1499	3.85223	3.48761	7.26059	5.22012	4.26099	2.92021	5.24124	6.20816	3.04971	4.21781	71.9604	0.374716
GSM5609155	Low_SOFA	1.64885	3.84211	6.95672	4.63209	5.45815	2.74122	3.04545	6.32124	5.3879	4.37965	2.80011	5.5565	5.17865	3.36011	4.54427	65.853	-1.66914
GSM5609156	Low_SOFA	2.7379	4.19887	6.73752	4.38992	5.20309	3.08772	3.50547	6.26464	5.0413	4.34224	3.04005	5.27939	5.91056	3.03411	4.53781	67.3106	-1.18136
GSM5609157	Low_SOFA	3.46154	4.04813	7.05547	5.52684	7.69982	3.63133	4.21198	7.44542	4.86238	4.40138	2.8334	5.18556	6.78832	2.37739	4.16168	73.6907	0.953756
GSM5609158	Low_SOFA	2.66692	4.30522	7.40126	4.8007	5.16235	3.61033	3.60328	6.41781	5.44826	4.12208	3.08419	5.29588	5.7474	3.29772	5.44581	70.4092	-0.14439
GSM5609159	Low_SOFA	3.61568	3.95925	6.98918	5.1722	7.11651	3.53689	4.1619	7.17867	4.87845	4.01732	2.74612	5.01987	6.55854	2.9562	4.06466	71.9714	0.378408
GSM5609160	Low_SOFA	2.98172	3.92887	6.7906	4.86079	5.247	3.50379	3.16213	6.7896	5.05917	4.35776	2.79868	5.09501	5.80756	2.74755	3.46317	66.5934	-1.42137
GSM5609161	Low_SOFA	3.0925	4.34525	7.55298	5.20383	6.98024	4.06988	3.86004	7.35388	5.39497	4.34249	2.81119	5.44324	6.49353	3.17123	4.07465	74.1899	1.12083
GSM5609162	Medium_SOFA	3.20781	4.38793	6.83028	4.28169	6.42546	2.96445	3.36268	6.13791	5.61468	4.36797	3.0097	5.49456	5.68293	3.02737	4.09087	68.8863	-0.654049
GSM5609163	Low_SOFA	3.08298	3.82415	6.52649	4.84717	5.86112	2.83111	3.08634	6.95912	4.88849	4.37149	2.79952	5.01118	5.66308	3.06224	3.07105	65.8855	-1.65827
GSM5609164	Low_SOFA	3.90457	3.45959	7.13281	5.91691	6.30938	3.52702	3.83354	8.1854	4.50543	3.86518	2.41547	4.71202	7.1329	2.90244	2.62679	70.4295	-0.13762
GSM5609165	Low_SOFA	2.40556	4.20532	7.34068	4.52776	6.92756	2.80164	3.70098	6.35978	5.65796	4.2971	3.03293	5.61086	5.69243	3.41538	4.76286	70.7388	-0.0340965
GSM5609166	Low_SOFA	3.23791	4.0134	6.85332	4.83038	7.81907	3.01901	3.49613	7.1081	5.15386	4.43594	2.83485	5.2715	6.46869	2.8384	3.96722	71.3478	0.1697
GSM5609167	Low_SOFA	3.2219	4.142	7.39456	5.23055	7.0027	3.68126	3.56878	7.22206	5.19489	4.00887	2.36341	5.19336	6.94004	2.72758	3.84509	71.737	0.299969
GSM5609168	Low_SOFA	3.54239	4.05552	7.26218	5.07702	6.67539	3.35832	3.57832	7.11864	5.42102	4.01698	3.04024	5.20918	6.72016	2.9871	4.33211	72.3946	0.520018
GSM5609169	Low_SOFA	1.62784	4.09971	6.81846	4.11998	4.95298	2.26252	3.02028	6.29159	5.36474	4.32752	3.2982	5.41845	5.0937	3.3889	4.56689	64.6518	-2.07115
GSM5609170	Medium_SOFA	3.72592	3.97868	7.90053	5.98585	5.03771	3.6269	4.07618	7.35439	5.4157	4.27732	2.95024	5.32253	6.31439	3.56688	4.46649	73.9997	1.05718
GSM5609171	Low_SOFA	3.53187	3.45063	6.98897	5.39297	7.28814	3.62896	3.69301	7.64941	4.93018	4.23973	2.79423	4.92871	6.56403	2.30444	2.90337	70.2886	-0.184751
GSM5609172	Medium_SOFA	2.51649	4.33927	8.27506	4.77358	4.667	3.22439	2.97678	6.98797	5.98277	4.1444	2.56622	5.44807	5.83737	3.75827	3.12648	68.6241	-0.741783
GSM5609173	Low_SOFA	3.09062	4.25538	7.34838	4.74731	6.56666	3.17342	3.52546	7.00114	5.46931	4.14427	3.04793	5.33813	5.69388	3.49905	4.18745	71.0884	0.0828899
GSM5609174	Low_SOFA	2.45905	4.21411	7.81638	4.16327	6.37135	4.14566	4.13561	7.31711	5.86897	3.38148	2.19981	5.31187	6.27976	3.52408	4.35958	71.5481	0.236734
GSM5609175	Low_SOFA	3.34664	4.00011	7.22573	5.24877	7.73936	3.66429	3.70262	7.19589	5.07453	4.28962	2.51	5.32585	6.55541	2.73182	3.4106	72.0212	0.395079
GSM5609176	Low_SOFA	2.87956	4.30158	6.99965	4.53062	6.95443	3.08209	3.20498	6.52516	5.28296	4.22552	2.50134	5.22685	6.10829	2.78887	3.98905	68.601	-0.749529
GSM5609177	Medium_SOFA	3.04613	4.28191	6.86171	4.67952	5.57734	3.10384	3.2559	6.483	5.33698	4.36434	3.19775	5.31388	5.84371	3.18619	4.20871	68.7409	-0.702701
GSM5609178	Low_SOFA	2.69152	4.21654	7.40852	4.69716	5.62206	3.63657	3.59339	6.88142	5.6514	4.32132	3.0155	5.34752	6.05456	3.39916	4.53898	71.0756	0.0786188
GSM5609179	Severe_SOFA	3.40379	4.29547	8.2193	5.1856	5.94356	4.19169	3.31959	7.28897	5.76329	4.04156	2.69915	5.46571	6.27509	3.13837	4.08959	73.3207	0.82996
GSM5609180	Low_SOFA	3.08893	3.82838	7.03472	4.79973	5.77111	3.2721	3.36407	6.6161	5.2125	4.34343	3.07234	5.31311	6.03904	2.85733	4.29694	68.9099	-0.646163
GSM5609181	Medium_SOFA	2.99398	4.01615	7.032	5.10678	5.92661	3.14658	2.64083	7.39087	5.08052	4.45612	2.78745	5.2743	5.95418	2.95532	4.22484	68.9865	-0.620499
GSM5609182	Low_SOFA	4.92833	3.38082	7.77727	5.37579	7.11525	4.17059	3.76968	8.64751	4.83309	3.19002	2.18351	4.90959	7.94848	3.48399	2.94157	74.6555	1.27664
GSM5609183	Low_SOFA	3.0636	4.71743	7.3348	4.34972	7.39325	3.47148	3.16537	6.33386	6.07354	4.3822	3.52471	5.83061	5.8962	3.02578	4.47425	73.0368	0.734935
GSM5609184	Low_SOFA	3.58377	3.8633	7.45484	5.09601	6.21949	4.26691	3.14993	7.53303	5.27296	4.09806	3.051	5.36349	6.43279	3.00363	3.55939	71.9486	0.370769
GSM5609185	Medium_SOFA	2.97737	4.2135	7.66799	5.30921	5.36565	4.04264	3.65965	7.04431	5.44601	4.50037	3.12169	5.3276	6.06846	3.43828	4.4084	72.5911	0.585796
GSM5609186	Low_SOFA	3.15423	3.94166	6.86552	4.7707	5.06899	3.8177	4.08033	6.33766	5.34098	4.04795	2.96476	5.01843	5.8481	3.19593	5.58061	70.0336	-0.270109
GSM5609187	Low_SOFA	3.68549	3.72245	6.77148	5.11269	7.06252	3.2498	3.58767	7.07673	5.04709	4.17555	2.7756	4.93513	6.08427	3.0332	3.66288	69.9826	-0.287174
GSM5609188	Low_SOFA	3.25893	3.99673	7.41781	4.94624	6.07218	3.37564	3.47528	7.29816	5.37379	3.81463	2.84937	5.04143	6.03437	3.33535	3.59926	69.8892	-0.318428
GSM5609189	Low_SOFA	3.08498	3.96753	7.01516	5.22974	5.18976	3.75997	3.27545	7.40077	4.82828	3.96794	2.46635	4.90491	6.09828	2.94907	3.75336	67.8916	-0.986938
GSM5609190	Medium_SOFA	3.11837	4.45099	8.18309	5.06492	7.05498	3.59525	3.73324	7.51144	5.8618	3.26824	2.35636	5.28331	6.78715	3.54193	3.16847	72.9795	0.715774
GSM5609191	Low_SOFA	3.33297	3.73346	7.30418	5.25489	5.94656	3.51244	3.41952	7.59205	4.8839	3.89029	2.90364	5.04761	6.18246	3.00911	3.38378	69.3969	-0.483175
GSM5609192	Low_SOFA	3.68719	3.87086	7.19741	5.34939	5.44234	4.01402	3.72002	7.71059	4.96302	4.00954	2.38054	4.97213	6.56339	2.93749	3.56988	70.3878	-0.151555
GSM5609193	Low_SOFA	3.95517	4.05843	7.19924	5.3629	7.25223	3.37253	4.1478	7.17085	5.15295	4.37964	2.74914	5.147	6.31885	2.74469	4.16478	73.1762	0.781588
GSM5609194	Severe_SOFA	3.34362	3.9035	7.3843	5.13824	5.42963	3.4687	3.41764	7.47856	5.05066	4.41323	2.90863	5.10856	6.37828	3.13289	3.40673	69.9632	-0.293661
GSM5609195	Low_SOFA	2.96558	3.94673	7.08152	5.19701	7.45717	3.54426	3.61083	7.40424	5.08664	4.48386	2.49118	5.2269	6.57662	2.77055	3.95326	71.7963	0.319813
GSM5609196	Medium_SOFA	3.35736	4.07721	7.66374	5.39144	7.31369	3.89432	3.69025	7.68385	5.36741	3.92583	2.68054	5.22237	6.51937	3.16141	3.74463	73.6934	0.954673
GSM5609197	Low_SOFA	2.94425	3.66434	6.19391	4.38894	6.91713	2.42733	3.1507	5.98433	4.78565	4.64134	2.9704	5.01897	5.3522	2.47277	4.40653	65.3188	-1.84793
GSM5609198	Medium_SOFA	2.96602	4.2842	7.65217	4.84121	5.44123	3.70835	3.29137	7.09101	5.21356	4.2707	2.80922	5.23201	6.38317	3.14363	3.64054	69.9684	-0.291916
GSM5609199	Low_SOFA	4.20051	3.66751	7.01224	5.92575	8.09953	3.76516	4.47921	8.08583	4.86648	4.19992	2.00447	4.9685	7.10865	2.6947	3.50866	74.5871	1.25376
GSM5609200	Low_SOFA	3.97206	4.012	7.51097	5.37027	5.51338	4.19934	3.52726	7.77565	4.96751	3.65664	2.49876	4.97987	7.1422	3.12103	3.16203	71.409	0.190179
GSM5609201	Low_SOFA	3.25485	4.21979	7.6331	5.42377	5.69109	3.95892	3.31534	7.47227	5.27807	3.98889	2.69406	5.28063	6.50466	2.93523	3.46236	71.113	0.0911348
GSM5609202	Low_SOFA	3.12801	4.45146	7.56581	4.47342	6.65294	3.70134	4.20323	7.192	5.76935	3.80296	2.62879	5.37987	6.37009	3.42421	4.68103	73.4245	0.864687
GSM5609203	Medium_SOFA	4.43088	3.7191	7.59675	5.88615	5.46705	4.45332	3.9169	7.86353	5.03083	3.95758	2.47021	4.96052	6.50202	3.31002	3.64073	73.2056	0.791419
GSM5609204	Severe_SOFA	4.44951	3.52178	7.06616	4.80094	7.61641	3.54715	3.76463	7.70485	4.77424	3.91013	1.9287	4.59087	7.36466	2.81647	3.07836	70.9349	0.031516
GSM5609205	Low_SOFA	3.0201	3.7744	6.75169	4.69139	4.45173	2.75104	3.15103	6.52078	4.68461	4.20415	2.9942	4.86379	5.659	2.81646	2.70996	63.0443	-2.60909
GSM5609206	Low_SOFA	3.6569	4.23256	7.19702	4.85026	7.39613	3.83337	3.72667	6.96052	5.18376	4.42984	2.82677	5.18715	6.49291	2.89016	3.88113	72.7452	0.637337
GSM5609207	Low_SOFA	3.06985	4.00686	6.36634	4.3382	5.99294	2.89829	3.28385	5.87199	5.32954	4.59009	3.39666	5.25146	5.382	2.61281	4.06825	66.4591	-1.46631
GSM5609208	Low_SOFA	2.87604	4.45364	7.92838	4.81028	6.66238	4.00121	3.72559	7.20069	5.81347	3.70801	2.58793	5.53524	6.58539	3.26547	3.28941	72.4431	0.536265
GSM5609209	Low_SOFA	3.50207	3.83505	6.34122	4.48578	5.42242	3.69856	3.62496	6.90403	5.17554	4.27365	3.057	4.9826	5.8665	3.03924	3.74962	67.9582	-0.964625
GSM5609210	Low_SOFA	3.46464	3.93316	6.84787	4.91856	6.58642	3.75671	3.51299	6.83228	5.2543	4.25521	2.94255	5.11396	6.07612	2.78286	3.94094	70.2186	-0.2082
GSM5609211	Low_SOFA	3.13336	4.35498	7.04846	4.65284	7.66135	3.92426	3.9685	7.16603	5.50248	4.40085	2.89521	5.43514	6.58706	2.99885	4.13459	73.864	1.01175
GSM5609212	Healthy	2.94134	4.24986	6.83441	4.33448	5.57178	3.63057	3.72955	6.97843	5.66993	4.23259	2.96308	5.27851	5.98205	3.29151	4.29727	69.9853	-0.286246
GSM5609213	Healthy	2.39474	4.04352	6.59923	4.09091	5.59972	3.32775	3.69595	6.50851	5.47856	4.22106	2.9594	5.22863	5.86214	3.07436	4.46843	67.5529	-1.10027
GSM5609214	Healthy	2.85708	4.21552	6.34569	4.28336	5.35549	3.47031	3.59276	6.45907	5.50898	4.20634	3.11933	5.22465	5.88386	3.06084	4.12871	67.712	-1.04703
GSM5609215	Healthy	2.81538	4.2805	6.51283	3.97665	5.45713	3.20839	3.61699	6.31	5.59276	4.17596	3.12251	5.25342	5.82612	3.10174	4.28048	67.5309	-1.10765
GSM5609216	Healthy	2.64216	4.16259	6.56158	4.25864	5.28075	3.2372	3.59383	6.08744	5.64078	4.19705	3.00367	5.31108	5.84702	3.15946	4.35248	67.3358	-1.17294
GSM5609217	Healthy	2.43643	4.30274	6.74541	4.00134	5.56155	3.41418	3.84716	6.74222	5.65226	3.98915	2.88205	5.28837	6.06836	3.21047	4.11656	68.2582	-0.864224
GSM5609218	Healthy	2.5629	3.74572	6.21791	4.35552	5.72849	2.89227	3.02023	6.25191	5.32843	4.37038	3.31166	5.16942	5.61982	3.04735	3.79143	65.4134	-1.81626
GSM5609219	Healthy	3.23793	3.90219	6.19525	4.62189	6.04121	2.85537	3.34113	6.98471	5.1141	4.33976	2.48245	5.1097	5.94666	2.85949	3.6195	66.6513	-1.40198
GSM5609220	Healthy	2.53354	4.00919	6.34155	4.48446	5.72003	2.69973	3.66385	6.39785	4.84342	4.43426	3.08547	5.04705	5.96072	2.75996	4.05019	66.0313	-1.60949
GSM5609221	Healthy	2.59908	3.7521	6.62007	4.75937	5.53403	2.98043	3.28071	6.87846	4.87955	4.11334	2.66715	5.15633	5.94532	2.69403	4.19626	66.0562	-1.60114
GSM5609222	Healthy	2.51545	3.8444	6.13535	4.37346	5.25151	2.45157	3.01974	6.2862	4.69522	4.55544	3.01	4.82344	5.66898	2.65947	3.81082	63.1011	-2.5901
GSM5609223	Healthy	2.25199	3.95928	6.17067	4.3519	5.55251	2.61842	3.34135	6.46301	5.01048	4.35944	3.44473	4.96491	5.63791	2.75927	3.90768	64.7936	-2.0237
GSM5609224	Healthy	3.07251	4.11732	7.05737	5.17708	6.26798	3.50247	3.61205	7.08127	5.0377	4.59233	2.90671	5.30763	6.3622	3.00594	4.09327	71.1938	0.118174
GSM5609225	Healthy	2.42814	3.99409	6.33891	4.60664	5.58859	3.1325	3.2211	6.37967	4.68376	4.68498	3.03248	5.00561	5.79308	2.8984	4.05587	65.8438	-1.67223
GSM5609226	Healthy	2.16107	3.93184	6.23533	4.72575	5.21272	2.74352	3.41384	6.42514	4.67837	4.65945	2.89501	5.05521	5.70019	2.69338	4.07027	64.6011	-2.08811
GSM5609227	Healthy	2.96279	3.68771	6.49107	4.99666	5.42797	3.21714	3.62937	6.77418	4.50542	4.35762	2.93043	5.05768	6.07485	2.70015	3.84294	66.656	-1.40044
GSM5609228	Healthy	2.57769	3.60005	6.47641	4.56738	5.39153	2.92276	3.47126	6.35111	5.02678	4.42595	3.03352	5.00146	5.81785	2.96484	3.95776	65.5863	-1.75839
GSM5609229	Healthy	3.1665	3.88923	6.70034	4.77043	6.04325	3.19307	3.70925	6.67426	4.94438	4.44099	2.79495	5.09867	6.14757	2.74022	4.60701	68.9201	-0.642721
GSM5609230	Healthy	2.63429	3.60301	6.5099	4.69728	5.76539	2.90969	3.37454	6.82515	4.62463	4.39822	2.75541	4.95639	5.94156	2.7399	4.11327	65.8486	-1.67061
GSM5609231	Healthy	2.35207	3.94211	6.33014	4.50769	5.52917	2.71497	3.434	6.65127	4.99267	4.4763	3.08516	5.18858	5.83868	3.19053	4.22454	66.4579	-1.46672
GSM5609232	Healthy	2.61023	3.91884	6.79454	4.8214	5.65518	3.46789	3.6924	6.66686	4.91455	4.28765	2.71002	5.09743	6.32261	2.7274	4.31616	68.0032	-0.949588
GSM5609233	Healthy	2.66894	3.95456	6.45626	4.45241	5.42216	2.98187	3.22005	6.17568	4.98743	4.40355	3.11243	5.08062	5.82572	2.83772	4.15297	65.7324	-1.70952
GSM5609234	Healthy	2.26898	3.79175	6.32974	4.83215	5.40109	3.0414	3.53898	6.73343	4.61562	4.4699	3.0308	4.97331	5.88963	2.60537	4.01246	65.5346	-1.7757
GSM5609235	Healthy	2.59211	4.07124	6.42705	4.43218	5.29228	2.8199	3.20072	6.20352	4.93308	4.39889	2.97969	5.15973	5.79172	2.84077	4.01637	65.1593	-1.90131
GSM5609236	Healthy	2.59782	3.86807	6.64681	4.569	5.28949	3.07284	3.60672	6.35191	5.15319	4.39644	2.94151	5.22145	5.89864	3.03266	4.26417	66.9107	-1.31518
GSM5609237	Healthy	2.47076	3.79963	6.77339	4.97122	5.40882	3.36134	3.49813	6.72588	4.76008	4.06925	2.70156	4.97588	5.91389	2.67796	3.88022	65.988	-1.62397
GSM5609238	Healthy	2.48838	3.7706	6.73356	4.481	5.61805	3.24218	3.5076	6.77502	4.72265	4.31073	2.64616	4.84918	6.09457	2.84606	3.61833	65.7041	-1.71899
GSM5609239	Healthy	2.31378	3.69329	6.48638	4.67497	5.18801	2.98768	3.59782	6.44557	4.65849	4.43924	2.8046	5.06591	5.88855	2.75685	4.16745	65.1686	-1.89819
GSM5609240	Healthy	2.27436	3.91623	6.47024	4.5515	5.5377	2.92658	3.56266	6.58378	4.90796	4.34495	2.95227	5.07216	5.96434	2.94495	4.37534	66.385	-1.4911
GSM5609241	Healthy	2.57014	3.82423	6.43497	4.83866	5.60358	2.99196	3.24163	6.39316	4.64779	4.57458	2.78208	5.04184	5.8851	2.58982	4.0065	65.426	-1.81203
GSM5609242	Healthy	2.60135	3.79343	6.4514	4.78516	5.90482	2.85092	3.4546	6.69477	4.7453	4.49578	2.84535	5.11894	5.8945	2.67229	4.40243	66.7111	-1.382
GSM5609243	Healthy	2.67418	4.01677	6.4286	4.47917	5.26456	2.86	3.40087	6.1999	5.04125	4.46206	3.16174	5.10872	5.93403	2.80282	4.28166	66.1163	-1.58102
GSM5609244	Healthy	2.93532	4.20947	6.53202	4.6185	5.56724	3.01549	3.59169	6.71407	5.1096	4.56749	3.12579	5.22896	5.98589	3.02352	4.248	68.4731	-0.792336
GSM5609245	Healthy	2.62962	3.9535	6.52921	4.63162	5.35182	2.97136	3.65215	6.5033	4.84548	4.42627	2.83604	5.02707	5.97462	2.82978	4.171	66.3328	-1.50857
GSM5609246	Healthy	2.44213	4.22569	6.55833	4.18899	5.35789	3.36741	3.8774	6.66085	5.30871	4.22405	3.07286	5.1961	5.95451	3.30089	4.21203	67.9478	-0.968108
GSM5609247	Healthy	2.59058	3.91376	7.39628	4.90887	4.97299	3.59965	3.65669	7.19392	5.13237	3.77396	1.95433	5.09443	6.24647	3.30198	4.03438	67.7707	-1.0274
GSM5609248	Healthy	2.97344	4.24202	7.01921	4.54166	5.97568	3.70687	4.03265	6.82208	5.47315	4.093	2.94383	5.38508	6.2242	3.25978	4.25886	70.9515	0.0370919
GSM5609249	Healthy	2.38897	4.17706	7.04576	4.14372	4.92232	3.43157	4.13214	6.18427	5.68814	3.8267	3.03962	5.52467	5.99865	3.41384	4.39085	68.3083	-0.84748
GSM5609250	Healthy	2.1254	4.30478	6.70308	3.89865	5.07767	3.17349	3.73851	6.59298	5.48806	4.03021	2.99816	5.34527	5.88517	3.50092	4.36639	67.2288	-1.20875
GSM5609251	Severe_SOFA	4.0907	4.14232	6.94507	5.59069	7.38741	3.928	4.07811	7.1436	5.25258	4.39088	2.98414	5.21041	6.58715	2.90101	4.31846	74.9505	1.37537
GSM5609252	Severe_SOFA	3.27936	4.45073	7.70152	4.82906	5.28583	3.70525	3.62114	7.0915	5.69713	3.77444	2.7649	5.30667	6.42577	3.32262	3.25903	70.515	-0.109005
GSM5609254	Severe_SOFA	3.5105	4.1834	7.25523	5.72861	5.35458	4.73285	3.8362	7.86783	5.07767	4.17483	2.49607	5.08852	6.83731	2.9162	3.38003	72.4398	0.535155
GSM5609255	Severe_SOFA	3.66728	4.05907	7.65137	5.53491	5.87375	4.25631	3.96912	7.46317	5.01366	4.05342	2.51985	5.04933	6.64547	3.37844	3.54565	72.6808	0.615802
GSM5609256	Severe_SOFA	3.34928	3.9856	7.05943	5.73919	6.67779	3.97698	4.15821	7.38229	4.83963	3.95704	2.16884	4.74481	6.63967	2.88815	3.45263	71.0195	0.0598511
GSM5609257	Severe_SOFA	3.99771	4.19344	7.63669	5.43329	6.90175	4.39118	4.2412	7.39186	5.60211	4.00518	2.63283	5.2199	7.13949	3.34638	3.91746	76.0505	1.74347
GSM5609258	Severe_SOFA	3.28782	4.05037	7.25131	4.89461	5.49011	3.51371	3.42883	7.02927	5.31988	4.15354	2.53121	5.07873	6.02879	3.43689	3.58691	69.082	-0.588563
GSM5609259	Severe_SOFA	3.5755	4.22673	8.4787	5.44884	4.66765	4.78028	3.60991	7.68673	5.69583	3.61674	2.19747	5.0876	6.80577	3.23152	2.5337	71.643	0.268492
GSM5609260	Severe_SOFA	3.87025	4.01796	7.02749	5.17941	6.99115	4.28436	4.42049	7.08336	5.24921	3.9404	2.73635	5.04498	6.57043	3.07924	4.25753	73.7526	0.974491
GSM5609261	Severe_SOFA	3.26393	4.11305	7.14497	5.13157	6.13011	4.45447	3.87182	7.25831	5.40965	4.03128	2.8144	5.19339	6.43983	2.87806	4.28684	72.4217	0.529087
GSM5609262	Medium_SOFA	3.54804	4.37575	7.8587	5.86233	4.88367	4.70369	3.84722	7.8258	5.43962	4.05797	2.81508	5.24113	6.5264	3.34534	3.90417	74.2349	1.13589
GSM5609263	Severe_SOFA	3.06902	4.00838	7.81416	5.45018	5.62446	3.97141	3.6681	7.94111	5.22013	4.35047	2.75467	5.25762	6.63981	3.16725	3.71515	72.6519	0.606142
GSM5609264	Severe_SOFA	3.08979	4.24904	8.55468	5.69924	5.14091	4.89531	3.59502	7.68879	5.82709	3.79965	2.6208	5.53225	6.72321	3.10571	3.06277	73.5842	0.918144
GSM5609265	Severe_SOFA	3.7288	4.10501	7.50408	5.53116	5.72559	4.58401	3.66133	7.92982	5.20073	4.10953	2.25728	5.14398	6.51759	3.03601	3.28201	72.3169	0.494033
GSM5609266	Low_SOFA	3.34453	4.08345	7.02386	4.89245	6.14169	3.97947	3.57266	7.54018	5.10411	4.43414	2.77253	5.02118	6.09094	3.32397	3.57242	70.8976	0.0190377
GSM5609267	Low_SOFA	3.73287	3.77082	7.43368	5.92765	7.13246	4.78094	4.15708	7.99249	4.85848	3.60881	2.18079	4.72582	7.29457	2.78363	3.19981	73.5799	0.916694
GSM5609268	Severe_SOFA	3.65726	4.29053	7.89441	5.10448	4.99284	3.82955	3.65946	7.50433	5.46508	4.18063	2.74087	5.29289	6.20962	3.58598	3.6785	72.0864	0.416894
GSM5609269	Severe_SOFA	3.38712	4.31299	7.30535	5.28813	6.62197	4.28448	3.75522	6.98917	5.40065	4.58083	3.27402	5.46391	6.37016	2.88928	4.4712	74.3945	1.18929
GSM5609270	Low_SOFA	3.39006	4.12535	7.64035	5.19143	5.37049	4.33799	3.55957	7.51644	5.23197	4.2842	2.68636	5.19464	6.79462	3.14661	3.51833	71.9884	0.384093
GSM5609271	Severe_SOFA	3.42625	4.19941	7.79749	5.51329	5.04992	4.51937	3.84589	7.58568	5.35848	4.13752	2.57412	5.20696	6.57641	3.15382	3.62461	72.5692	0.578463
GSM5609272	Severe_SOFA	3.30946	4.29324	8.22807	6.18254	4.67023	4.83726	3.96711	7.50417	5.62266	4.0669	2.76306	5.42548	6.67481	3.70045	3.87953	75.125	1.43376
GSM5609273	Severe_SOFA	3.70223	4.23075	8.20291	5.4007	5.94724	4.2112	3.50864	8.07933	5.64793	3.75484	2.19217	5.30634	7.31571	3.36331	2.76426	73.6275	0.932633
GSM5609274	Low_SOFA	3.31035	3.86092	6.75156	4.90456	5.62632	3.81489	3.65521	7.2709	4.88799	4.14653	2.62677	4.98458	6.36968	2.87406	3.5337	68.618	-0.743832
GSM5609276	Medium_SOFA	3.32959	4.21181	7.00038	4.92827	6.26788	3.42714	3.82406	6.95527	5.34011	4.35889	3.18894	5.24783	6.20643	2.99501	4.39553	71.6771	0.279924
GSM5609277	Low_SOFA	3.85621	4.17017	7.25664	5.49064	7.01101	4.61902	4.02009	7.26652	5.02214	4.18119	2.65204	5.12569	6.7055	2.96046	4.07614	74.4134	1.19564
GSM5609278	Medium_SOFA	3.09253	4.26873	7.40738	5.04958	4.80153	3.66263	3.48355	7.07736	5.28619	4.38946	2.81391	5.22715	6.35899	3.1833	4.06432	70.1666	-0.225582
GSM5609279	Severe_SOFA	3.19702	3.69611	7.55222	4.60139	6.11852	3.54407	3.81967	7.3522	5.2424	3.51229	2.59778	4.98751	6.59032	3.20682	3.45613	69.4745	-0.457217
GSM5609280	Severe_SOFA	3.39118	4.26363	7.91836	4.84229	5.39855	3.62541	3.66783	7.23761	5.37015	4.23516	2.92845	5.16221	6.32145	3.21201	3.32064	70.8949	0.0181503
GSM5609281	Severe_SOFA	2.56948	4.07123	6.88163	4.50657	5.13997	3.66244	3.73409	6.74886	5.57029	4.29961	3.06478	5.28409	5.9304	3.37772	3.9228	68.764	-0.694981
GSM5609282	Severe_SOFA	3.97001	3.95904	7.85054	5.6053	6.73629	4.10949	3.73575	7.80696	5.18963	3.99916	2.25305	5.15712	6.91034	3.32038	3.20469	73.8078	0.992941
GSM5609283	Severe_SOFA	3.50658	4.15061	7.40689	5.03504	7.95622	4.38505	4.38577	7.32901	5.3358	4.01437	2.73871	5.21769	6.67552	3.4576	3.83418	75.4291	1.53552
GSM5609284	Low_SOFA	3.26974	4.09878	7.79551	5.59486	5.14992	4.46109	4.16969	8.01074	4.98597	4.00714	2.42864	5.10296	6.71818	2.95967	4.36509	73.118	0.762104
GSM5609285	Medium_SOFA	3.55047	4.41711	7.29539	4.582	6.55209	4.17929	3.86718	7.06116	5.76799	3.85571	2.7023	5.1397	6.42984	2.95968	3.82673	72.1867	0.450437
GSM5609286	Low_SOFA	3.57979	3.80937	7.92035	5.94133	6.30523	4.19398	3.89675	8.06319	4.92257	4.31943	2.75095	5.02276	6.53105	3.04672	3.60739	73.9109	1.02745
GSM5609287	Severe_SOFA	3.23858	4.12193	8.22284	5.47848	5.099	5.08307	3.4562	7.65568	5.28239	3.87712	2.43249	5.2126	6.8265	3.20672	2.94601	72.1396	0.434691
GSM5609288	Low_SOFA	2.86665	3.60832	7.48488	5.66758	5.49668	3.99882	3.73346	7.876	4.70388	3.75192	2.1477	4.74403	6.46604	3.24897	2.92014	68.7151	-0.711346
GSM5609289	Low_SOFA	3.14262	4.02122	6.79806	4.90662	5.61097	3.72275	3.62186	7.14237	5.00603	4.27927	2.77443	4.9221	6.12751	2.82066	3.84821	68.7447	-0.701433
GSM5609290	Low_SOFA	3.29606	4.05675	6.96992	5.03966	6.07933	4.36159	3.56475	7.07443	5.25304	4.26147	2.70441	5.07352	6.31448	2.86093	3.72975	70.6401	-0.0671361
GSM5609291	Low_SOFA	3.23904	4.24287	7.17449	4.4433	6.91781	3.81715	3.83313	7.14781	5.52299	4.29733	2.98491	5.36138	6.39037	3.18458	4.16644	72.7236	0.630125
GSM5609292	Severe_SOFA	3.51678	4.1595	7.14847	5.28103	6.95708	4.21942	4.06978	7.01968	5.44482	4.13194	2.99791	5.28491	6.43609	2.9941	4.10035	73.7619	0.977583
GSM5609293	Severe_SOFA	3.37192	4.01287	6.85125	4.78388	6.11531	3.92565	3.80785	6.8797	5.12865	4.24355	2.82567	4.97464	6.14044	3.17337	3.30383	69.5386	-0.43575
GSM5609294	Low_SOFA	3.45923	4.09229	7.82214	5.2615	5.56337	3.96568	3.67693	7.80084	5.19686	3.92446	2.55186	5.08197	6.76473	3.27215	2.9682	71.4022	0.187915
GSM5609295	Severe_SOFA	3.62752	4.02743	7.23713	5.37177	6.63851	3.66833	3.92345	7.636	5.00677	4.18793	2.49211	4.96905	6.82499	3.05462	3.67709	72.3427	0.502653
GSM5609296	Medium_SOFA	2.88843	3.91635	7.50434	5.2173	5.38774	4.26718	4.00659	7.54513	4.95317	4.00338	2.48315	4.93409	6.82592	3.00829	3.60192	70.543	-0.0996319
GSM5609297	Severe_SOFA	3.00322	4.24378	7.30461	4.61104	5.50422	3.85115	3.80052	6.95236	5.91	4.04907	3.04096	5.38567	5.83122	3.55217	4.50965	71.5496	0.237257
GSM5609298	Severe_SOFA	3.21897	3.87228	7.88057	5.58704	6.1388	4.90734	3.94037	7.6621	5.04016	3.5448	2.43136	4.90822	7.14727	2.87097	3.30001	72.4503	0.538649
GSM5609299	Severe_SOFA	3.79759	4.19477	7.77464	5.37282	5.19199	3.91963	3.87662	7.60216	5.5772	4.11567	2.85242	5.3921	6.31237	3.25314	4.46307	73.6962	0.955605
GSM5609300	Severe_SOFA	3.74615	4.17652	7.537	4.91509	6.0359	4.35303	3.62013	7.11729	5.46968	4.20389	2.70647	5.25017	6.82091	2.82453	3.342	72.1188	0.427709
GSM5609301	Medium_SOFA	3.42575	4.18567	6.71973	4.92437	6.77762	3.72858	3.72019	6.82082	5.10745	4.28656	2.78728	5.16625	6.44335	2.87635	4.22819	71.1982	0.119637
GSM5609302	Low_SOFA	3.06464	4.16893	6.44431	4.51088	5.53001	3.1671	3.35399	6.31263	5.21195	4.3547	2.90903	5.12879	5.94739	2.82612	3.87826	66.8087	-1.34932
GSM5609303	Low_SOFA	3.59231	4.19831	7.35334	4.88668	5.26749	4.06924	3.91639	7.06218	5.54169	4.2876	2.71699	5.26473	6.57068	3.1309	3.84362	71.7022	0.288298
GSM5609304	Severe_SOFA	3.1701	4.01333	7.43659	5.31883	6.46193	4.31244	4.15427	7.45475	5.45583	3.80551	2.54154	5.10609	6.37052	3.27721	4.04316	72.9221	0.696558
GSM5609305	Severe_SOFA	3.76377	4.17466	7.84739	5.05165	6.33105	4.62556	3.85095	7.50344	5.33649	3.7808	2.55712	5.2707	7.14408	3.14036	3.39377	73.7718	0.98091
GSM5609306	Low_SOFA	3.27405	4.01641	7.77872	5.77554	5.0237	4.59896	3.89796	7.74236	5.12353	4.14837	2.46963	5.11889	6.73862	3.23993	3.57931	72.526	0.563991
GSM5609307	Severe_SOFA	3.65241	3.77262	8.01191	4.96416	5.6397	4.5431	3.86427	7.47597	5.42935	4.00239	2.70283	5.2563	6.78482	2.94928	3.76186	72.811	0.659362
GSM5609308	Severe_SOFA	3.78094	3.56729	7.93917	5.7669	5.33163	4.79779	3.50157	7.73991	5.09557	3.86543	2.945	5.18235	6.98207	3.15578	3.39245	73.0438	0.737295
GSM5609310	Medium_SOFA	3.13794	4.10076	6.994	5.06813	5.55118	3.64946	3.79049	7.15683	5.07816	4.21519	2.81834	5.0413	6.013	3.30171	3.85924	69.7757	-0.356394
GSM5609311	Severe_SOFA	3.63963	4.18504	7.45206	5.21077	6.1468	3.71652	3.91839	7.52415	5.41779	4.24428	2.60843	5.39801	6.45128	3.28479	4.0312	73.2291	0.799301
GSM5609312	Medium_SOFA	3.20323	4.23448	8.04336	5.14166	5.32845	4.46075	3.97054	7.5544	5.38764	3.93917	2.57847	5.27885	6.69335	3.31435	3.48436	72.6131	0.593129
GSM5609313	Low_SOFA	2.86185	4.28052	7.48573	4.701	5.60986	3.79437	3.84763	6.94309	5.475	3.92337	2.29542	5.14225	6.25623	3.2582	3.98426	69.8588	-0.328602
GSM5609314	Low_SOFA	3.57841	4.31275	6.85012	4.90938	6.58505	3.54434	3.90494	6.67322	5.33378	4.19204	2.8235	5.2193	6.50931	2.97212	4.33729	71.7455	0.302813
GSM5609315	Severe_SOFA	4.2346	4.09764	7.80764	5.33743	6.31631	4.38074	3.76697	7.59382	5.50907	4.14939	2.95031	5.3335	7.19897	2.95988	3.92181	75.5581	1.57869
GSM5609316	Severe_SOFA	1.97205	4.40077	7.14854	4.38623	4.48052	3.34208	4.18474	6.75821	5.46407	3.88322	3.11449	5.11366	5.80179	3.7664	5.80692	69.6237	-0.407274
GSM5609317	Low_SOFA	3.60609	4.13536	7.61791	5.51529	6.50156	4.61341	3.61953	8.07473	5.1057	4.03835	2.37743	5.2527	7.07434	2.65744	3.2585	73.4483	0.87266
GSM5609318	Medium_SOFA	3.43527	3.951	7.49078	4.99196	5.40743	3.91381	3.85643	7.60451	5.36178	3.93984	2.47608	5.13328	6.57019	3.34343	3.83856	71.3143	0.158511
GSM5609319	Low_SOFA	3.37914	3.74245	7.08035	5.21122	5.59043	4.24735	4.31426	7.68837	4.97948	3.66188	2.12222	4.70241	6.85891	2.83014	3.04943	69.458	-0.46271
GSM5609320	Low_SOFA	3.41561	3.98109	6.91146	5.1185	5.99439	3.52368	4.16503	7.15407	5.48122	4.07344	3.58486	5.04933	6.65048	2.78982	4.01372	71.9067	0.356749
GSM5609321	Severe_SOFA	3.72072	4.24125	7.79023	5.01252	5.90463	4.14243	4.12075	7.14771	5.32374	3.68011	2.43191	5.11756	6.78529	3.26441	3.9446	72.6279	0.598087
GSM5609322	Severe_SOFA	3.53271	4.25598	7.13949	5.31572	6.63133	3.89881	3.99593	7.1705	5.48779	4.40693	2.91964	5.29685	6.26811	3.13403	4.18725	73.6411	0.937161
GSM5609323	Severe_SOFA	2.79061	4.15256	7.85505	5.16614	5.3169	3.67993	3.87835	7.4946	5.09922	4.14547	2.43247	5.00734	6.46323	3.48766	3.57167	70.5412	-0.100225
GSM5609324	Severe_SOFA	3.33845	4.03623	7.29712	5.01923	5.37224	4.28958	3.20403	7.47325	5.29074	4.24181	3.01465	5.41641	6.6591	2.8527	3.63373	71.1393	0.0999188
GSM5609325	Medium_SOFA	3.24858	3.87371	7.64437	5.14023	5.59421	4.30507	3.97947	7.27265	5.06882	4.08201	2.43927	5.12279	6.62399	3.13665	3.41178	70.9436	0.0344377
GSM5609326	Severe_SOFA	2.84418	3.88012	7.15545	5.34626	4.92843	4.10916	4.12865	7.25334	5.18727	4.18579	2.51751	4.9777	6.30581	3.14817	3.43656	69.4044	-0.480657
GSM5609327	Low_SOFA	3.7117	4.00241	7.23126	5.2649	5.70231	4.26163	4.03393	7.27314	5.16622	4.24338	2.76121	5.01048	6.46011	2.94934	3.73825	71.8103	0.324475
GSM5609328	Medium_SOFA	3.33776	3.94526	7.01249	5.37619	6.93721	4.13836	4.25817	7.7914	4.71522	3.9893	2.0911	4.84541	6.95691	2.93639	3.4504	71.7816	0.314872
GSM5609329	Severe_SOFA	3.218	4.40068	7.63335	5.42629	5.25673	3.23968	3.5565	6.94163	5.46965	4.48217	3.31976	5.38189	5.97556	3.79697	4.30829	72.4072	0.524227
GSM5609330	Severe_SOFA	3.64288	4.07133	7.5208	5.32749	5.40379	4.06676	3.54834	7.40614	5.06977	4.29246	2.71557	5.15946	6.45357	3.13445	3.79113	71.604	0.25543
GSM5609331	Low_SOFA	3.63305	4.04246	7.08591	4.99429	6.44963	4.29852	4.01962	7.10139	5.31753	3.98898	2.561	5.14158	6.6626	2.90574	3.82219	72.0245	0.396167
GSM5609332	Medium_SOFA	3.59156	4.08799	7.10481	4.83866	6.58115	4.19852	4.17206	6.97167	5.34249	3.74022	2.61927	4.96139	6.50323	3.22373	3.94448	71.8812	0.348218
GSM5609333	Healthy	2.56423	4.19967	6.34466	4.62953	5.69701	3.13772	3.45366	6.43808	5.12318	4.44595	3.25812	5.17952	6.00002	3.00534	3.94634	67.423	-1.14373
GSM5609334	Healthy	3.11594	3.79855	6.73327	4.93991	5.51034	3.61365	3.95705	6.71561	5.1166	4.15342	2.91484	5.10562	6.23766	3.02667	4.18567	69.1248	-0.574229
GSM5609335	Healthy	2.97271	4.03706	6.35215	4.63028	5.98965	3.0854	3.48822	6.89364	4.89175	4.48717	2.94869	5.00623	5.93168	3.12762	3.83643	67.6787	-1.05817
GSM5609336	Healthy	3.12862	4.05178	6.35483	4.6923	5.66067	3.41345	3.58574	6.83194	5.17346	4.20443	2.84544	5.06775	6.10859	3.01029	3.71535	67.8446	-1.00265
GSM5609337	Healthy	3.01585	4.06357	6.63992	4.2999	5.61782	3.11237	3.47215	6.45086	5.6734	4.10848	3.04992	5.21687	5.92659	3.26514	4.03983	67.9527	-0.966493
