# Supplementary material for: Energy-Starved Inflammation in Autism: Failure of Glycolytic Compensation Under IL-10–Driven Metabolic Tolerance
Source: Research Square preprint supplement (doi:10.21203/rs.3.rs-8390063/v1), 2025-12-24
Supplement: Supplementary file 2 [file bf394d45cbbeee465953c65c.xlsx]

## Sheet: Ctrl_vs_LowIL10_Module
Module	Mean logCPM (Ctrl)	Mean logCPM (ASD Low IL-10)	Delta	p_raw	Cliff	p_adj	Signif
Acute_Inflammation	3.72802	3.91533	0.187308	0.0263182	0.440789	0.0894818
FAO	4.58195	4.6233	0.0413444	0.349848	0.190789	0.540674
Glycolysis	6.97873	7.03332	0.0545876	0.285819	0.217105	0.485892
HIF1A	4.62893	4.71659	0.0876682	0.589285	0.111842	0.667856
IFNγ	5.86097	6.03022	0.169247	0.070786	0.361842	0.15042
IL10	4.91157	4.50695	-0.404615	6.9947e-06	-0.822368	0.00011891	***
IL4 Th2	2.43936	1.81867	-0.620692	0.0342713	-0.421053	0.097102
IL4_Th2	5.26092	5.04097	-0.219948	0.0029064	-0.578947	0.0247044	*
IL6_STAT3	5.76699	5.76031	-0.00668054	0.756126	0.0657895	0.803384
OXPHOS	6.18918	6.48224	0.293059	0.00900936	0.513158	0.0510531
PDH	4.52732	4.71002	0.182706	0.0947849	0.335526	0.179038
PSA	3.8587	3.92233	0.0636222	0.461123	0.151316	0.584523
TCA	5.21878	5.381	0.162223	0.0165083	0.473684	0.0701602
TNFA_NFKB	5.8984	6.01195	0.113551	0.0406095	0.407895	0.098623
cSLP	4.0164	4.05387	0.0374708	0.481372	0.144737	0.584523
mSLP	3.3876	3.2901	-0.0975035	0.461123	-0.151316	0.584523
Tau_index	-0.406953	-0.380267	0.0266863	0.806341	0.0526316	0.806341

## Sheet: Ctrl_vs_LowIL10_Gene
ENSG	GeneSymbol	Modules	Enzyme	Category	Mean_g1	Mean_g2	Delta	logFC	T_value	p_raw_limma	p_adj_limma	p_raw_wilcox	Cliff	Signif
ENSG00000167863	ATP5PD	OXPHOS	ATP synthase peripheral stalk subunit D (ATP5H)	Complex V stator – frequently ↓	6.14014	7.46601	1.32587	1.32587	7.14579	1.71344e-08	2.87858e-06	7.85235e-07	0.881579	***
ENSG00000136634	IL10	IL10	Interleukin-10	Master anti-inflammatory cytokine – chronically ↑ in many ASD children (blood & brain)	0.585538	-0.938217	-1.52376	-1.52376	-5.75443	1.30576e-06	0.000109684	2.50251e-07	-0.907895	***
ENSG00000140374	ETFA	FAO	Electron Transfer Flavoprotein	Electron Transfer Flavoprotein	5.23753	5.99432	0.756788	0.756788	5.36951	4.35836e-06	0.000244068	1.99388e-05	0.789474	***
ENSG00000164919	COX6C	OXPHOS	Cytochrome c oxidase subunit 6C	Complex IV – ubiquitous isoform, often ↓	5.75944	7.45738	1.69795	1.69795	5.21885	6.97621e-06	0.000244431	0.000147313	0.717105	***
ENSG00000205560	CPT1B	FAO	Carnitine palmitoyltransferase 1B	Carnitine Shuttle	4.40151	3.23434	-1.16716	-1.16716	-5.20541	7.27474e-06	0.000244431	5.18334e-05	-0.756579	***
ENSG00000108515	ENO3	cSLP	Enolase 3 (beta, muscle)	Muscle-specific (low in brain)	2.51004	1.85302	-0.657023	-0.657023	-5.07307	1.09836e-05	0.00030754	8.6972e-06	-0.815789	***
ENSG00000177646	ACAD9	FAO	Acyl-CoA dehydrogenase family member 9	Long/Very Long-Chain Acyl-CoA Dehydrogenases	4.21652	3.70465	-0.511868	-0.511868	-4.86312	2.10575e-05	0.00050538	3.57262e-05	-0.769737	***
ENSG00000091140	DLD	TCA	Dihydrolipoamide dehydrogenase (E3)	Shared E3 for α-KGDH and PDH complexes	4.9044	5.95338	1.04898	1.04898	4.80112	2.54999e-05	0.000535499	0.000147313	0.717105	***
ENSG00000105639	JAK3	IL4_Th2	Janus kinase 3	Lymphocyte-specific – strongly associated with IL-4 pathway	6.8084	6.18769	-0.620705	-0.620705	-4.6851	3.64423e-05	0.000680257	1.32726e-05	-0.802632	***
ENSG00000084754	HADHA	FAO	Trifunctional Enzyme Subunit Alpha	Trifunctional Protein	5.94542	6.52553	0.58011	0.58011	4.6415	4.16585e-05	0.000699862	0.000173649	0.710526	***
ENSG00000111716	LDHB	cSLP	Lactate dehydrogenase B (H subunit)	Minor role in brain	7.72064	8.92081	1.20016	1.20016	4.57874	5.04817e-05	0.00073948	0.000105182	0.730263	***
ENSG00000169429	CXCL8	Acute_Inflammation	C-X-C motif chemokine ligand 8 (IL-8)	Strongest neutrophil chemoattractant – ↑↑↑↑↑ in sepsis, negligible in ASD	4.28354	5.60932	1.32578	1.32578	4.56392	5.282e-05	0.00073948	7.42717e-05	0.743421	***
ENSG00000164951	PDP1	PDH	Pyruvate dehydrogenase phosphatase catalytic subunit 1	Main mitochondrial activator (Ca²⁺-sensitive) – often ↓ in ASD (less de-repression)	5.22564	5.99418	0.76854	0.76854	4.32821	0.000108069	0.00139659	0.000684286	0.651316	**
ENSG00000232810	TNF	TNFA_NFKB	Tumor necrosis factor (TNF-α)	Master cytokine – ↑↑↑↑ in sepsis, usually normal/low in ASD brain	5.17848	6.03232	0.853843	0.853843	3.91502	0.000369839	0.00443807	0.0022721	0.592105	**
ENSG00000131143	COX4I1	OXPHOS	Cytochrome c oxidase subunit 4I1	Complex IV (most abundant isoform) – frequently ↓ in ASD	8.31308	8.72458	0.4115	0.4115	3.86139	0.000432682	0.00463571	0.000442251	0.671053	**
ENSG00000143546	S100A8	Acute_Inflammation	S100 calcium-binding protein A8 (calprotectin subunit)	Best blood marker of bacterial inflammation – ↑↑↑↑ in sepsis, normal in ASD	9.43872	10.2476	0.808927	0.808927	3.85448	0.000441496	0.00463571	0.00154947	0.611842	**
ENSG00000152556	PFKM	cSLP	Phosphofructokinase muscle	Rate-limiting step	3.9149	3.50229	-0.412617	-0.412617	-3.74136	0.000613136	0.00605923	0.00118931	-0.625	**
ENSG00000027697	IFNGR1	IFNγ	Interferon-γ receptor 1	Chain-1 of receptor – constitutive expression	7.34411	7.89206	0.547948	0.547948	3.71273	0.000665928	0.00621532	0.000788104	0.644737	**
ENSG00000167315	ACAA2	FAO	Acetyl-CoA acyltransferase 2	Acetyl-CoA acyltransferase 2	4.61629	5.05614	0.439853	0.439853	3.66651	0.000760542	0.00672479	0.000905782	0.638158	**
ENSG00000228987	HLA-DRA	IFNγ	Major histocompatibility complex, class II, DR alpha	MHC-II induction – ↑↑↑ in sepsis, low in resting ASD microglia/astrocytes	8.52617	9.17517	0.648999	0.648999	3.62031	0.000868008	0.00729127	0.002572	0.585526	**
ENSG00000129521	EGLN3	HIF1A	Egl-9 family hypoxia-inducible factor 3 (PHD3)	Brain-enriched prolyl hydroxylase – strongly induced by hypoxia	1.24691	1.79136	0.544456	0.544456	3.59589	0.000930598	0.00744478	0.0022721	0.592105	**
ENSG00000172340	SUCLG2	TCA	Succinate-CoA ligase (GDP/ADP-forming) β subunit	Determines GDP vs ADP specificity	5.01279	5.4888	0.47601	0.47601	3.50233	0.00121302	0.00926307	0.00176359	0.605263	**
ENSG00000140740	UQCRC2	OXPHOS	Ubiquinol-cytochrome c reductase core protein 2	Complex III core – frequently reduced	6.72532	7.15848	0.433157	0.433157	3.42595	0.00150304	0.0109787	0.00369215	0.565789	*
ENSG00000172840	PDP2	PDH	Pyruvate dehydrogenase phosphatase catalytic subunit 2	Cytosolic, Ca²⁺-insensitive isoform – minor role in brain, usually unchanged	3.80798	3.47045	-0.33753	-0.33753	-3.39535	0.00163697	0.0114588	0.0022721	-0.592105	*
ENSG00000204370	SDHD	TCA	Succinate dehydrogenase complex subunit D	Complex II anchor	6.99856	7.3559	0.357346	0.357346	3.35618	0.00182508	0.0122646	0.00200357	0.598684	*
ENSG00000135390	ATP5MC2	OXPHOS	ATP synthase membrane subunit c isoform 2	Complex V ring – brain isoform	6.61893	7.25034	0.631416	0.631416	3.32715	0.00197771	0.012779	0.000905782	0.638158	*
ENSG00000173039	RELA	TNFA_NFKB	RELA proto-oncogene, NF-κB subunit (p65)	Transcriptionally active subunit – strongly ↑ in sepsis, low in ASD	6.48182	6.20527	-0.276557	-0.276557	-3.30153	0.0021224	0.013206	0.000326935	-0.684211	*
ENSG00000117118	SDHB	TCA	Succinate dehydrogenase iron-sulfur subunit B	Complex II + TCA	5.11512	5.60409	0.48897	0.48897	3.1725	0.0030182	0.0170587	0.0022721	0.592105	*
ENSG00000136872	ALDOB	cSLP	Aldolase B (liver/kidney)	Low in brain	2.73265	3.32378	0.591128	0.591128	3.16908	0.0030462	0.0170587	0.00522072	0.546053	*
ENSG00000156515	HK1	Glycolysis	Hexokinase 1	1. Glucose → Glucose-6-phosphate (rate-limiting)	6.76332	7.02478	0.261458	0.261458	3.18384	0.0029269	0.0170587	0.00118931	0.625	*
ENSG00000096968	JAK2	IFNγ	Janus kinase 2	Secondary kinase – constitutive	4.06696	4.69705	0.630093	0.630093	3.09823	0.00368595	0.0199755	0.0135681	0.486842	*
ENSG00000159399	HK2	Glycolysis	Hexokinase 2	1. Glucose → Glucose-6-phosphate (cancer isoform)	4.86046	5.36899	0.508532	0.508532	3.05205	0.00416909	0.0218877	0.0199746	0.460526	*
ENSG00000122971	ACADS	FAO	Short-Chain Acyl-CoA Dehydrogenase	Medium/Short-Chain	4.395	3.97194	-0.423055	-0.423055	-2.91983	0.00590417	0.0297988	0.0149766	-0.480263	*
ENSG00000178537	SLC25A20	FAO	Carnitine/acylcarnitine translocase	Carnitine Shuttle	3.99355	4.41501	0.421466	0.421466	2.91168	0.00603071	0.0297988	0.00652432	0.532895	*
ENSG00000014641	MDH1	TCA	Malate dehydrogenase 1 (cytosolic)	OAA ↔ malate (shuttle function, minor direct TCA)	6.24271	6.66145	0.418746	0.418746	2.83468	0.00735837	0.0350688	0.00652432	0.532895	*
ENSG00000112715	VEGFA	HIF1A	Vascular endothelial growth factor A	Classic HIF target – neuroprotection/angiogenesis; variable in ASD but often ↑ at protein level	4.31717	3.73917	-0.578	-0.578	-2.82649	0.00751474	0.0350688	0.0149766	-0.480263	*
ENSG00000125166	GOT2	mSLP	Aspartate aminotransferase, mitochondrial	Malate-aspartate shuttle + transamination to feed OAA/α-KG into TCA/mSLP	5.09269	4.80133	-0.291358	-0.291358	-2.80274	0.00798549	0.0362584	0.0081028	-0.519737	*
ENSG00000136143	SUCLA2	TCA	Succinate-CoA ligase (ADP-forming) β subunit	Brain/abundant isoform – mutations cause severe mtDNA depletion + ASD	4.18143	4.71123	0.529797	0.529797	2.78472	0.00836084	0.0369637	0.0181713	0.467105	*
ENSG00000179091	CYC1	OXPHOS	Cytochrome c1	Complex III – heme protein, ↓ in many cohorts	5.40442	5.07913	-0.325296	-0.325296	-2.72582	0.0097053	0.0418075	0.0199746	-0.460526	*
ENSG00000113520	IL4	IL4 Th2	Interleukin-4	Master Th2 cytokine – ↑ in many ASD children with atopy, GI issues, chronic LPS exposure	2.43936	1.81867	-0.620692	-0.620692	-2.70518	0.0102219	0.0419161	0.0342713	-0.421053	*
ENSG00000117054	ACADM	FAO	Medium-Chain Acyl-CoA Dehydrogenase	Medium/Short-Chain	4.7418	5.38092	0.639122	0.639122	2.69527	0.010479	0.0419161	0.0240384	0.447368	*
ENSG00000127884	ECHS1	FAO	Enoyl-CoA Hydratase	Enoyl-CoA Hydratase	5.97865	5.69287	-0.285775	-0.285775	-2.70393	0.0102541	0.0419161	0.00584087	-0.539474	*
ENSG00000166123	GPT2	mSLP	Alanine aminotransferase 2, mitochondrial	Alanine ↔ pyruvate + glutamate ↔ α-KG – important for neuronal amino-acid shuttling & energy	0.879299	0.436902	-0.442397	-0.442397	-2.63521	0.0121693	0.0475451	0.0342713	-0.421053	*
ENSG00000102970	CCL17	IL4_Th2	C-C motif chemokine ligand 17 (TARC)	Classic Th2 chemokine – attracts CCR4+ Tregs & Th2 cells – ↑ in ASD with allergy/atopy	1.68603	1.25871	-0.427322	-0.427322	-2.61349	0.0128398	0.0490248	0.0240384	-0.447368	*
ENSG00000134333	LDHA	cSLP	Lactate dehydrogenase A (M subunit)	Regenerates NAD⁺ in cytoplasm – critical for glycolysis	7.57883	7.86116	0.282331	0.282331	2.50349	0.0167895	0.0626808	0.0373293	0.414474
ENSG00000169021	UQCRFS1	OXPHOS	Ubiquinol-cytochrome c reductase Rieske iron-sulfur	Complex III Rieske protein – often ↓	6.65036	6.91446	0.264104	0.264104	2.48548	0.017533	0.0640335	0.0287766	0.434211
ENSG00000162434	JAK1	IFNγ	Janus kinase 1	Main signalling kinase – constitutive	8.38143	8.58513	0.203695	0.203695	2.43489	0.0197849	0.0707207	0.0081028	0.519737
ENSG00000004799	PDK4	PDH	Pyruvate dehydrogenase kinase isoform 4	Muscle/heart, starvation-induced – usually low/unchanged in brain/ASD	3.0963	4.01746	0.921167	0.921167	2.42587	0.0202129	0.0707453	0.0287766	0.434211
ENSG00000100644	HIF1A	HIF1A	Hypoxia-inducible factor 1-alpha	Master regulator – protein stabilised/activated in many ASD brains despite normal or low mRNA	7.85001	8.12879	0.278782	0.278782	2.38941	0.0220304	0.0755327	0.0441232	0.401316
ENSG00000162645	GBP2	IFNγ	Guanylate-binding protein 2	Same family	6.91172	7.25882	0.347096	0.347096	2.36752	0.0231916	0.0763957	0.031424	0.427632
ENSG00000275302	CCL4	Acute_Inflammation	C-C motif chemokine ligand 4 (MIP-1β)	Same family, strong sepsis induction	5.08463	5.49011	0.405482	0.405482	2.37354	0.0228668	0.0763957	0.0656164	0.368421
ENSG00000157184	CPT2	FAO	Carnitine palmitoyltransferase 2	Carnitine Shuttle	3.936	3.67921	-0.256798	-0.256798	-2.35659	0.0237914	0.0768645	0.00727646	-0.526316
ENSG00000100412	ACO2	TCA	Aconitase 2 (mitochondrial)	Citrate ↔ cis-aconitate ↔ isocitrate	4.52773	4.80259	0.27486	0.27486	2.34388	0.024507	0.0776826	0.0263182	0.440789
ENSG00000108691	CCL2	Acute_Inflammation	C-C motif chemokine ligand 2 (MCP-1)	Monocyte/macrophage recruitment – ↑↑↑ in sepsis, low/variable in ASD	-1.23341	-1.72376	-0.490358	-0.490358	-2.18824	0.0349765	0.108816	0.070786	-0.361842
ENSG00000274233	CCL5	Acute_Inflammation	C-C motif chemokine ligand 5 (RANTES)	T-cell/eosinophil recruitment – ↑ in sepsis, variable in ASD	7.93109	8.22795	0.296861	0.296861	2.1434	0.038654	0.11807	0.0561855	0.381579
ENSG00000110090	CPT1A	FAO	Carnitine palmitoyltransferase 1A	Carnitine Shuttle	4.90434	5.33991	0.435568	0.435568	2.13294	0.0395598	0.118679	0.0518992	0.388158
ENSG00000107485	GATA3	IL4_Th2	GATA binding protein 3	Master regulator of Th2 differentiation – frequently ↑ in ASD peripheral blood	6.16802	6.37761	0.209592	0.209592	2.07499	0.0449234	0.132406	0.070786	0.361842
ENSG00000135766	EGLN1	HIF1A	Egl-9 family hypoxia-inducible factor 1 (PHD2)	Main oxygen sensor – hydroxylates & degrades HIF-α; often dysregulated in ASD	6.97528	7.26363	0.288356	0.288356	2.06407	0.0460035	0.133252	0.0607537	0.375
ENSG00000067225	PKM	Glycolysis	Pyruvate kinase M1/M2	10. PEP → Pyruvate (final rate-limiting step)	5.9307	6.22099	0.290294	0.290294	2.05146	0.0472782	0.134623	0.0656164	0.368421
ENSG00000168291	PDHB	PDH	Pyruvate dehydrogenase E1 β subunit	Core catalytic subunit – frequently ↓ or mutated in ASD	5.61706	5.9397	0.322646	0.322646	1.99815	0.053015	0.148413	0.031424	0.427632
ENSG00000171503	ETFDH	FAO	Electron Transfer Flavoprotein	Electron Transfer Flavoprotein	2.14847	2.49929	0.350821	0.350821	1.98283	0.0547713	0.148413	0.070786	0.361842
ENSG00000283447	NDUFS1	OXPHOS	NADH:ubiquinone oxidoreductase iron-sulfur protein 1	Complex I core subunit – one of the most common CI hits in ASD	4.08708	4.31718	0.230105	0.230105	1.98937	0.0540156	0.148413	0.0518992	0.388158
ENSG00000067992	PDK3	PDH	Pyruvate dehydrogenase kinase isoform 3	Brain-enriched – frequently ↑ in ASD (together with PDK1)	6.40734	6.18052	-0.226821	-0.226821	-1.9374	0.0602805	0.160377	0.0518992	-0.388158
ENSG00000105953	OGDH	TCA	Oxoglutarate dehydrogenase (E1)	α-ketoglutarate → succinyl-CoA + NADH	3.89557	3.62554	-0.270031	-0.270031	-1.93098	0.0610959	0.160377	0.0762751	-0.355263
ENSG00000090339	ICAM1	Acute_Inflammation	Intercellular adhesion molecule 1	Endothelial activation & leukocyte adhesion – ↑↑↑ in sepsis, low in ASD	3.15383	2.95008	-0.203746	-0.203746	-1.8727	0.0689468	0.170339	0.0656164	-0.368421
ENSG00000162711	NLRP3	Acute_Inflammation	NLR family pyrin domain containing 3	Major inflammasome platform – strongly activated in sepsis, mostly quiescent in ASD	3.61296	3.36962	-0.243343	-0.243343	-1.87986	0.0679385	0.170339	0.088262	-0.342105
ENSG00000166888	STAT6	IL4_Th2	Signal transducer and activator of transcription 6	Canonical IL-4 transcription factor – phosphorylated/up in Th2 conditions	7.86225	7.67648	-0.185773	-0.185773	-1.8825	0.0675698	0.170339	0.0656164	-0.368421
ENSG00000243646	IL10RB	IL10	IL-10 receptor β (shared with IL-22/26/28)	Constitutive	5.88694	6.12701	0.240068	0.240068	1.88525	0.0671869	0.170339	0.0561855	0.381579
ENSG00000163220	S100A9	Acute_Inflammation	S100 calcium-binding protein A9 (calprotectin subunit)	Same as S100A8 – extremely high in sepsis plasma	9.4772	9.71358	0.236377	0.236377	1.82756	0.0756074	0.184088	0.088262	0.342105
ENSG00000160712	IL6R	IL6_STAT3	Interleukin-6 receptor α	Membrane-bound receptor – moderate constitutive	7.50637	7.7296	0.223229	0.223229	1.80936	0.0784431	0.188263	0.0762751	0.355263
ENSG00000005882	PDK2	PDH	Pyruvate dehydrogenase kinase isoform 2	Broadly expressed inhibitor – mild-to-moderate ↑ in some ASD subgroups	2.46484	2.76148	0.296642	0.296642	1.7738	0.0842439	0.189304	0.18226	0.269737
ENSG00000102144	PGK1	Glycolysis	Phosphoglycerate kinase 1	7. 1,3-BPG → 3-PG (substrate-level phosphorylation)	8.71813	8.59432	-0.123808	-0.123808	-1.76556	0.0856377	0.189304	0.0656164	-0.368421
ENSG00000111674	ENO2	cSLP	Enolase 2 (neuron-specific, gamma)	Brain-specific enolase	2.90355	2.6515	-0.252045	-0.252045	-1.79725	0.0803798	0.189304	0.0820962	-0.348684
ENSG00000138755	CXCL9	IFNγ	C-X-C motif chemokine ligand 9 (MIG)	Strongest IFN-γ-inducible chemokine – ↑↑↑↑ in sepsis, low/near-zero in most ASD	1.63065	1.39757	-0.233075	-0.233075	-1.78161	0.082939	0.189304	0.0199746	-0.460526
ENSG00000171314	PGAM1	Glycolysis	Phosphoglycerate mutase 1	8. 3-Phosphoglycerate → 2-Phosphoglycerate	8.21346	8.08287	-0.130592	-0.130592	-1.76989	0.0849035	0.189304	0.088262	-0.342105
ENSG00000185338	SOCS1	IL4_Th2	Suppressor of cytokine signalling 1	Negative feedback – ↑ in chronic IL-4/Th2 states	3.28487	2.98291	-0.301958	-0.301958	-1.78606	0.0822033	0.189304	0.151458	-0.289474
ENSG00000110955	ATP5F1B	OXPHOS	ATP synthase F1 subunit beta	Complex V catalytic core – strongly ↓ in almost every ASD cohort	7.00747	7.19656	0.189095	0.189095	1.72962	0.0919496	0.200617	0.088262	0.342105
ENSG00000282019	GPI	Glycolysis	Glucose-6-phosphate isomerase	2. Glucose-6-P → Fructose-6-P	5.66464	5.90369	0.239048	0.239048	1.71245	0.0950995	0.20483	0.142101	0.296053
ENSG00000074800	ENO1	Glycolysis	Enolase 1	9. 2-Phosphoglycerate → Phosphoenolpyruvate	7.98111	8.14313	0.162026	0.162026	1.70288	0.0968934	0.206052	0.193468	0.263158
ENSG00000159199	ATP5MC1	OXPHOS	ATP synthase membrane subunit c isoform 1	Complex V ring – highly expressed, often ↓	5.15778	4.91348	-0.244304	-0.244304	-1.68406	0.100505	0.21106	0.171528	-0.276316
ENSG00000073756	PTGS2	Acute_Inflammation	Prostaglandin-endoperoxide synthase 2 (COX-2)	Inducible cyclooxygenase – prostaglandin storm in sepsis, low in ASD brain	4.44195	4.79421	0.352258	0.352258	1.6529	0.106728	0.221362	0.142101	0.296053
ENSG00000073578	SDHA	TCA	Succinate dehydrogenase flavoprotein subunit A	Complex II + TCA: succinate → fumarate + FADH₂	6.26893	6.37943	0.110504	0.110504	1.56155	0.126822	0.255257	0.133183	0.302632
ENSG00000105397	TYK2	IL6_STAT3	Tyrosine kinase 2	Minor role in IL-6 signalling – constitutive	5.6991	5.50611	-0.19299	-0.19299	-1.56807	0.125293	0.255257	0.217344	-0.25
ENSG00000288118	GLUD2	mSLP	Glutamate dehydrogenase 2 (brain/testis-specific)	Brain-evolved isoform, less sensitive to GTP inhibition – frequently altered in ASD	3.00344	3.28607	0.282625	0.282625	1.55814	0.127628	0.255257	0.193468	0.263158
ENSG00000162654	GBP4	IFNγ	Guanylate-binding protein 4	Same family	4.2461	3.95584	-0.290263	-0.290263	-1.53457	0.133312	0.263487	0.133183	-0.302632
ENSG00000213341	CHUK	TNFA_NFKB	Conserved helix-loop-helix ubiquitous kinase (IKKα)	IKK complex – activated in sepsis, quiescent in most ASD	4.09674	4.33487	0.238131	0.238131	1.51222	0.138888	0.271316	0.124693	0.309211
ENSG00000105679	GAPDHS	cSLP	Spermatogenic GAPDH (rarely expressed in brain)	Same as GAPDH (usually ignore in brain)	0.630653	0.0111061	-0.619546	-0.619546	-1.48047	0.147128	0.283827	0.461123	-0.151316
ENSG00000206240	HLA-DRB1	IFNγ	Major histocompatibility complex, class II, DR beta 1	Same MHC-II – strong IFN-γ target	8.80267	8.99335	0.190684	0.190684	1.47468	0.148672	0.283827	0.193468	0.263158
ENSG00000067182	TNFRSF1A	TNFA_NFKB	TNF receptor superfamily member 1A (TNFR1)	Main signalling receptor – normal in ASD, strongly ↑ in sepsis	6.5188	6.32232	-0.196476	-0.196476	-1.44098	0.157917	0.291139	0.441347	-0.157895
ENSG00000111537	IFNG	IFNγ	Interferon-γ	Master type-1 cytokine – ↑↑↑ in viral/bacterial sepsis, usually low in ASD	1.65845	2.06196	0.403511	0.403511	1.44748	0.156098	0.291139	0.271102	0.223684
ENSG00000131473	ACLY	TCA	ATP-citrate lyase	Citrate (mito → cyto) → acetyl-CoA + OAA (lipids, epigenetics)	6.09324	6.21625	0.12301	0.12301	1.44093	0.157929	0.291139	0.151458	0.289474
ENSG00000138029	HADHB	FAO	Trifunctional Enzyme Subunit Beta	Trifunctional Protein	7.13436	7.02164	-0.112725	-0.112725	-1.4356	0.159433	0.291139	0.133183	-0.302632
ENSG00000172331	BPGM	cSLP	Bisphosphoglycerate mutase (2,3-BPG synthesis)	Modulates GAPDH/PGK step (mainly erythrocytes)	5.07014	5.35184	0.281698	0.281698	1.41085	0.166558	0.300879	0.151458	0.289474
ENSG00000069399	BCL3	IL10	B-cell lymphoma 3-encoded protein	IL-10 → stabilises repressive p50/p50 NF-κB homodimers → blocks pro-inflammatory genes	6.2114	6.00616	-0.20524	-0.20524	-1.40447	0.168433	0.301029	0.285819	-0.217105
ENSG00000152234	ATP5F1A	OXPHOS	ATP synthase F1 subunit alpha	Complex V catalytic core – almost always ↓ in ASD	8.27027	8.43264	0.162369	0.162369	1.36586	0.180146	0.318574	0.088262	0.342105
ENSG00000124370	MCEE	PSA	Methylmalonyl-CoA epimerase	Isomerase	3.35815	3.57448	0.216327	0.216327	1.35412	0.18383	0.321702	0.193468	0.263158
ENSG00000162692	VCAM1	Acute_Inflammation	Vascular cell adhesion molecule 1	Same endothelial activation pattern as ICAM1	0.638404	0.9657	0.327296	0.327296	1.29755	0.202393	0.350536	0.133183	0.302632
ENSG00000067057	PFKP	Glycolysis	Phosphofructokinase-1, platelet subunit	3. Fructose-6-P → Fructose-1,6-BP (committed step)	5.21472	5.03981	-0.174912	-0.174912	-1.29013	0.204929	0.351306	0.217344	-0.25
ENSG00000010256	UQCRC1	OXPHOS	Ubiquinol-cytochrome c reductase core protein 1	Complex III core – often ↓ in ASD	5.69968	5.55316	-0.146524	-0.146524	-1.26502	0.213693	0.362631	0.116619	-0.315789
ENSG00000152256	PDK1	PDH	Pyruvate dehydrogenase kinase isoform 1	Main brain inhibitor – often strongly ↑↑ in ASD (extra braking of PDH)	5.52504	5.35725	-0.167791	-0.167791	-1.2235	0.228799	0.384383	0.230024	-0.243421
ENSG00000109320	NFKB1	TNFA_NFKB	Nuclear factor NF-κB p105/p50 subunit	Core subunit – mild activation in some ASD, massive in sepsis	5.3846	5.54111	0.156511	0.156511	1.19639	0.239078	0.397675	0.54484	0.125
ENSG00000168610	STAT3	IL6_STAT3	Signal transducer and activator of transcription 3	Principal transcription factor – massively phosphorylated/activated in sepsis, low in ASD	7.48962	7.65201	0.16239	0.16239	1.16915	0.249744	0.411344	0.349848	0.190789
ENSG00000134352	IL6ST	IL6_STAT3	Interleukin-6 signal transducer (gp130)	Shared co-receptor – strongly induced in sepsis	7.24132	7.43298	0.191662	0.191662	1.1463	0.258958	0.422378	0.161264	0.282895
ENSG00000110324	IL10RA	IL10	IL-10 receptor α	Constitutive + induced	6.96239	6.83286	-0.12953	-0.12953	-1.12029	0.269737	0.435729	0.461123	-0.151316
ENSG00000163541	SUCLG1	TCA	Succinate-CoA ligase (GDP/ADP-forming) α subunit	Substrate-level phosphorylation (succinyl-CoA → succinate + GTP/ATP)	6.01892	6.13318	0.114256	0.114256	1.10466	0.276369	0.44219	0.367141	0.184211
ENSG00000131828	PDHA1	PDH	Pyruvate dehydrogenase E1 α subunit (somatic)	Core catalytic subunit – X-linked, most frequently mutated / ↓↓↓ in ASD	4.87692	5.02875	0.151834	0.151834	1.09251	0.281599	0.446308	0.367141	0.184211
ENSG00000111640	GAPDH	Glycolysis	Glyceraldehyde-3-phosphate dehydrogenase	6. GAP → 1,3-Bisphosphoglycerate (NAD⁺ → NADH)	9.28807	9.194	-0.0940747	-0.0940747	-1.06687	0.292872	0.459836	0.193468	-0.263158
ENSG00000176171	BNIP3	HIF1A	BCL2/adenovirus E1B 19kDa interacting protein 3	Mitophagy & cell-death mediator under chronic hypoxia; ↑ in some ASD subgroups	4.30326	4.47684	0.173579	0.173579	1.03734	0.306242	0.476377	0.367141	0.184211
ENSG00000115009	CCL20	IL6_STAT3	C-C motif chemokine ligand 20 (MIP-3α)	Strong STAT3 target – ↑↑ in sepsis, very low in ASD	-1.42725	-1.71915	-0.291903	-0.291903	-1.02271	0.31302	0.478067	0.2569	-0.230263
ENSG00000143384	MCL1	IL6_STAT3	Myeloid cell leukaemia 1	Another anti-apoptotic STAT3 target – ↑↑ in sepsis, low in ASD	9.26098	9.18664	-0.0743331	-0.0743331	-1.02663	0.311192	0.478067	0.171528	-0.276316
ENSG00000184557	SOCS3	IL6_STAT3	Suppressor of cytokine signalling 3	Classic negative-feedback gene – ↑↑↑↑ in sepsis, low in ASD	3.86477	3.6848	-0.179961	-0.179961	-0.964534	0.340977	0.516074	0.367141	-0.184211
ENSG00000102962	CCL22	IL4_Th2	C-C motif chemokine ligand 22 (MDC)	Same CCR4 axis – strongly induced by IL-4, ↑ in many ASD blood studies	2.98701	2.74125	-0.245766	-0.245766	-0.952314	0.347056	0.516987	0.217344	-0.25
ENSG00000109107	ALDOC	cSLP	Aldolase C (brain-specific)	Predominant aldolase isoform in adult brain	4.38646	4.4866	0.100142	0.100142	0.944832	0.350812	0.516987	0.367141	0.184211
ENSG00000117228	GBP1	IFNγ	Guanylate-binding protein 1	Classic IFN-γ-inducible GTPase – ↑↑↑ in sepsis, very low in ASD	7.20584	7.44531	0.239476	0.239476	0.945177	0.350638	0.516987	0.171528	0.276316
ENSG00000111669	TPI1	Glycolysis	Triosephosphate isomerase	5. DHAP ↔ Glyceraldehyde-3-P	7.21461	7.12368	-0.0909242	-0.0909242	-0.931524	0.357561	0.517847	0.243208	-0.236842
ENSG00000160883	HK3	cSLP	Hexokinase 3	Minor in most tissues	5.58913	5.43601	-0.153122	-0.153122	-0.93403	0.356283	0.517847	0.441347	-0.157895
ENSG00000163739	CXCL1	Acute_Inflammation	C-X-C motif chemokine ligand 1 (GRO-α)	Neutrophil recruitment – massive in sepsis, near-zero in ASD	3.68283	3.49468	-0.188151	-0.188151	-0.90958	0.368872	0.529663	0.682706	-0.0855263
ENSG00000173599	PC	TCA	Pyruvate carboxylase	Anaplerosis: pyruvate → oxaloacetate (critical in astrocytes)	0.235455	0.461898	0.226443	0.226443	0.88346	0.382635	0.544768	0.523243	0.131579
ENSG00000100906	NFKBIA	TNFA_NFKB	NF-κB inhibitor alpha (IκBα)	Rapidly degraded in sepsis → NF-κB release; stable in ASD	7.43651	7.54909	0.112582	0.112582	0.876087	0.386578	0.545758	0.217344	0.25
ENSG00000158864	NDUFS2	OXPHOS	NADH:ubiquinone oxidoreductase iron-sulfur protein 2	Complex I core – pathogenic variants common in mitochondrial ASD	5.81378	5.88838	0.0745987	0.0745987	0.856084	0.397406	0.55177	0.333067	0.197368
ENSG00000274221	CCL3	Acute_Inflammation	C-C motif chemokine ligand 3 (MIP-1α)	Macrophage inflammatory protein – ↑↑ in sepsis, low in ASD	2.26661	2.53042	0.263811	0.263811	0.856918	0.396951	0.55177	0.367141	0.184211
ENSG00000062485	CS	TCA	Citrate synthase	TCA entry: acetyl-CoA + OAA → citrate	6.44957	6.36171	-0.087855	-0.087855	-0.842839	0.404679	0.557263	0.481372	-0.144737
ENSG00000143437	ARNT	HIF1A	Aryl hydrocarbon receptor nuclear translocator	HIF-1β – obligatory dimerisation partner	3.8526	3.94445	0.0918553	0.0918553	0.820096	0.417361	0.570053	0.333067	0.197368
ENSG00000059804	SLC2A3	Glycolysis	Glucose transporter 3 (GLUT3)	Glucose uptake	7.34416	7.21255	-0.131611	-0.131611	-0.808526	0.423904	0.571358	0.566859	-0.118421
ENSG00000081041	CXCL2	Acute_Inflammation	C-X-C motif chemokine ligand 2 (GRO-β)	Same family, same pattern	1.32167	1.12352	-0.198155	-0.198155	-0.806392	0.425118	0.571358	0.502083	-0.138158
ENSG00000105379	ETFB	FAO	Electron Transfer Flavoprotein	Electron Transfer Flavoprotein	4.17966	4.07874	-0.100917	-0.100917	-0.765624	0.448708	0.598277	0.612101	-0.105263
ENSG00000138796	HADH	FAO	Hydroxyacyl-CoA Dehydrogenase	Hydroxyacyl-CoA Dehydrogenase	6.50719	6.44133	-0.065857	-0.065857	-0.743878	0.461601	0.601155	0.441347	-0.157895
ENSG00000169248	CXCL11	IFNγ	C-X-C motif chemokine ligand 11 (I-TAC)	Same CXCR3-ligand family – same pattern	-0.179692	-0.387992	-0.208301	-0.208301	-0.755861	0.45447	0.601155	0.333067	-0.197368
ENSG00000182054	IDH2	TCA	Isocitrate dehydrogenase 2 (mitochondrial/NADP⁺)	Reductive carboxylation + NADPH (important in ASD mitochondria)	5.6436	5.54648	-0.0971207	-0.0971207	-0.747143	0.459652	0.601155	0.461123	-0.151316
ENSG00000101365	IDH3B	TCA	Isocitrate dehydrogenase 3 (NAD⁺) β subunit	Main TCA catalytic enzyme	5.49801	5.41952	-0.0784888	-0.0784888	-0.734435	0.467266	0.603852	0.658831	-0.0921053
ENSG00000077238	IL4R	IL4_Th2	Interleukin-4 receptor α (shared with IL-13)	Constitutive + induced in Th2-skewed states	7.05082	6.94597	-0.104845	-0.104845	-0.697544	0.489779	0.623355	0.271102	-0.223684
ENSG00000141959	PFKL	cSLP	Phosphofructokinase liver	Rate-limiting step	4.86653	4.93493	0.0684026	0.0684026	0.701998	0.487029	0.623355	0.658831	0.0921053
ENSG00000118503	TNFAIP3	TNFA_NFKB	TNF-α-induced protein 3 (A20)	Major negative feedback – often ↓/mutated in autoimmune, normal in ASD	6.27289	6.34234	0.0694586	0.0694586	0.691166	0.493732	0.623661	0.461123	0.151316
ENSG00000136244	IL6	Acute_Inflammation	Interleukin-6	Acute-phase driver, fever, CRP induction – ↑↑↑↑ in sepsis, very low in ASD	1.16575	1.27	0.104249	0.104249	0.633544	0.530236	0.664774	0.706895	0.0789474
ENSG00000150768	DLAT	PDH	Dihydrolipoamide S-acetyltransferase (E2)	Core lipoamide swinging arm – ↓ in many ASD cohorts	3.72914	3.81165	0.0825103	0.0825103	0.62266	0.537288	0.668625	0.706895	0.0789474
ENSG00000125538	IL1B	Acute_Inflammation	Interleukin-1β	Master alarm cytokine – ↑↑↑↑ in sepsis, almost undetectable in ASD	5.19077	5.29173	0.100961	0.100961	0.600086	0.55207	0.681968	0.706895	0.0789474
ENSG00000146701	MDH2	TCA	Malate dehydrogenase 2 (mitochondrial)	Malate → OAA + NADH (core TCA step)	7.00276	6.94705	-0.0557125	-0.0557125	-0.589824	0.558858	0.685314	0.481372	-0.144737
ENSG00000159128	IFNGR2	IFNγ	Interferon-γ receptor 2	Chain-2 – induced by IFN-γ	7.44181	7.52099	0.0791875	0.0791875	0.580427	0.565109	0.687959	0.986964	-0.00657895
ENSG00000262785	PKLR	cSLP	Pyruvate kinase liver/red blood cell	Direct ATP-producing enzyme (cSLP step 2)	2.7415	2.84954	0.108038	0.108038	0.572866	0.570166	0.689121	0.986964	-0.00657895
ENSG00000104365	IKBKB	TNFA_NFKB	Inhibitor of κB kinase β (IKKβ)	Main kinase that frees NF-κB – massively active in sepsis	5.81739	5.76831	-0.0490805	-0.0490805	-0.517763	0.607675	0.724038	0.682706	-0.0855263
ENSG00000139180	NDUFA9	OXPHOS	NADH:ubiquinone oxidoreductase subunit A9	Complex I accessory – often ↓ in ASD brain cohorts	4.56164	4.64088	0.0792472	0.0792472	0.522412	0.604466	0.724038	0.384943	0.177632
ENSG00000137265	IRF4	IL4_Th2	Interferon regulatory factor 4	Co-operates with STAT6 for Th2 programme – frequently ↑ in ASD immune cells	6.23996	6.15716	-0.0828029	-0.0828029	-0.491939	0.625639	0.740193	0.589285	-0.111842
ENSG00000171552	BCL2L1	IL6_STAT3	BCL2-like 1 (Bcl-xL)	Anti-apoptotic STAT3 target – ↑ in sepsis (cell survival), low in ASD	6.501	6.60946	0.108462	0.108462	0.470474	0.64075	0.752769	0.481372	0.144737
ENSG00000125347	IRF1	IFNγ	Interferon regulatory factor 1	First-wave transcription factor – classic IFN-γ-induced gene	7.6236	7.67269	0.0490907	0.0490907	0.452501	0.653523	0.762444	0.908937	0.0263158
ENSG00000117394	SLC2A1	Glycolysis	Glucose transporter 1 (GLUT1)	Glucose uptake	5.13591	5.09625	-0.0396664	-0.0396664	-0.43121	0.668792	0.774877	0.384943	-0.177632
ENSG00000175198	PCCA	PSA	Propionyl-CoA carboxylase subunit alpha	Ligase	3.36374	3.43326	0.0695148	0.0695148	0.419299	0.677398	0.779472	0.806341	0.0526316
ENSG00000167792	NDUFV1	OXPHOS	NADH:ubiquinone oxidoreductase flavoprotein 1	Complex I core subunit – frequently mutated/down in ASD	5.70723	5.65105	-0.0561852	-0.0561852	-0.410019	0.684133	0.781866	0.781122	-0.0592105
ENSG00000116016	EPAS1	HIF1A	Endothelial PAS domain protein 1 (HIF-2α)	HIF-2α – important in neural stem cells & astrocytes; altered in some ASD subgroups	3.1149	3.04773	-0.0671753	-0.0671753	-0.374635	0.710049	0.801628	0.54484	-0.125
ENSG00000166411	IDH3A	TCA	Isocitrate dehydrogenase 3 (NAD⁺) α subunit	Main TCA catalytic enzyme: isocitrate → α-ketoglutarate + NADH	3.56823	3.64225	0.0740167	0.0740167	0.37339	0.710967	0.801628	0.960905	0.0131579
ENSG00000143252	SDHC	TCA	Succinate dehydrogenase complex subunit C	Complex II anchor	6.50722	6.47144	-0.0357851	-0.0357851	-0.362772	0.718819	0.805077	0.658831	-0.0921053
ENSG00000148672	GLUD1	mSLP	Glutamate dehydrogenase 1 (ubiquitous)	Glutamate → α-ketoglutarate + NADH/NADPH – major neuronal anaplerosis & reducing power	4.57498	4.63609	0.0611156	0.0611156	0.340118	0.735672	0.813111	0.731376	0.0723684
ENSG00000163734	CXCL3	Acute_Inflammation	C-X-C motif chemokine ligand 3 (GRO-γ)	Same family, same pattern	-0.808248	-0.709575	0.0986727	0.0986727	0.34604	0.731253	0.813111	0.781122	-0.0592105
ENSG00000170950	PGK2	cSLP	Phosphoglycerate kinase 2 (testis-specific)	Direct ATP-producing enzyme (cSLP step 1)	1.56822	1.51779	-0.0504287	-0.0504287	-0.32584	0.746363	0.814214	0.612101	-0.105263
ENSG00000178741	COX5A	OXPHOS	Cytochrome c oxidase subunit 5A	Complex IV – ↓ in brain ASD studies	7.11035	7.07219	-0.0381581	-0.0381581	-0.33215	0.741631	0.814214	1	6.93889e-18
ENSG00000146085	MMUT	PSA	Methylmalonyl-CoA mutase	Isomerase	4.83363	4.79593	-0.0376996	-0.0376996	-0.307626	0.760074	0.823823	0.908937	0.0263158
ENSG00000115415	STAT1	IFNγ	Signal transducer and activator of transcription 1	Principal transcription factor – strongly phosphorylated/up in active IFN-γ response	8.05683	8.10295	0.046125	0.046125	0.267706	0.790397	0.851197	0.422052	0.164474
ENSG00000149925	ALDOA	Glycolysis	Fructose-bisphosphate aldolase A	4. Fructose-1,6-BP → DHAP + GAP	8.39418	8.42805	0.0338685	0.0338685	0.25954	0.796643	0.852458	0.857345	-0.0394737
ENSG00000119689	DLST	TCA	Dihydrolipoamide S-succinyltransferase (E2)	Part of α-KGDH complex	3.88371	3.85717	-0.0265424	-0.0265424	-0.235835	0.814848	0.866421	0.934887	0.0197368
ENSG00000072778	ACADVL	FAO	Very long-chain acyl-CoA dehydrogenase	Long/Very Long-Chain Acyl-CoA Dehydrogenases	5.48015	5.50373	0.0235777	0.0235777	0.217715	0.828835	0.87575	0.88308	-0.0328947
ENSG00000170525	PFKFB3	HIF1A	6-phosphofructo-2-kinase/fructose-2,6-biphosphatase 3	Key glycolytic driver – brain isoform; highly sensitive to HIF activation but variable in ASD	5.37128	5.34078	-0.0305076	-0.0305076	-0.178688	0.859148	0.902105	0.682706	-0.0855263
ENSG00000169245	CXCL10	IFNγ	C-X-C motif chemokine ligand 10 (IP-10)	Same family – one of the best markers of active IFN-γ response	2.12246	2.17823	0.0557707	0.0557707	0.164671	0.870091	0.907921	0.682706	0.0855263
ENSG00000091483	FH	TCA	Fumarate hydratase	Fumarate → malate	5.47057	5.45649	-0.0140869	-0.0140869	-0.14096	0.888658	0.920673	0.706895	-0.0789474
ENSG00000115361	ACADL	FAO	Long-chain acyl-CoA dehydrogenase	Long/Very Long-Chain Acyl-CoA Dehydrogenases	0.0767599	0.0564674	-0.0202925	-0.0202925	-0.135081	0.893272	0.920673	0.706895	0.0789474
ENSG00000067829	IDH3G	TCA	Isocitrate dehydrogenase 3 (NAD⁺) γ subunit	Main TCA catalytic enzyme	5.51727	5.50314	-0.0141287	-0.0141287	-0.106332	0.915887	0.938226	0.54484	-0.125
ENSG00000110435	PDHX	PDH	Pyruvate dehydrogenase protein X component (E3BP)	Anchors E3 to complex – mutations cause severe PDH deficiency + autistic features	4.52291	4.53877	0.0158635	0.0158635	0.0856402	0.93221	0.949159	0.658831	0.0921053
ENSG00000114054	PCCB	PSA	Propionyl-CoA carboxylase subunit beta	Ligase	3.8793	3.88564	0.00634623	0.00634623	0.0588921	0.953352	0.963477	0.986964	0.00657895
ENSG00000138413	IDH1	TCA	Isocitrate dehydrogenase 1 (cytosolic/NADP⁺)	Mainly NADPH production (minor TCA role in brain)	5.77732	5.78304	0.0057167	0.0057167	0.0533438	0.957742	0.963477	0.682706	0.0855263
ENSG00000234745	HLA-B	IFNγ	Major histocompatibility complex, class I, B	MHC-I induction – ↑ in active IFN-γ states	9.93641	9.93432	-0.00209067	-0.00209067	-0.0261487	0.979278	0.979278	0.441347	-0.157895

## Sheet: Ctrl_vs_HighIL10_Module
Supplementary Table S1. Gene composition and functional definitions of the immunometabolic modules used for τ-axis construction, stratification, and comparative analyses in the autism spectrum disorder cohort.
Module	Mean logCPM (Ctrl)	Mean logCPM (ASD High IL-10)	Delta	p_raw	Cliff	p_adj	Signif
Acute_Inflammation	3.72802	4.13381	0.405789	0.000684286	0.651316	0.00290822	**
FAO	4.58195	4.70484	0.122882	0.00522072	0.546053	0.0110328	*
Glycolysis	6.97873	7.07248	0.0937533	0.161264	0.282895	0.19582
HIF1A	4.62893	4.97871	0.349785	0.000442251	0.671053	0.00290487	**
IFNγ	5.86097	6.25936	0.398393	0.00327857	0.572368	0.00928929	**
IL10	4.91157	5.10348	0.191909	0.0287766	0.434211	0.0489202	*
IL4 Th2	2.43936	2.17881	-0.260546	0.20516	-0.256579	0.232515
IL4_Th2	5.26092	5.01182	-0.2491	0.000512624	-0.664474	0.00290487	**
IL6_STAT3	5.76699	5.94568	0.178696	0.0441232	0.401316	0.0625079
OXPHOS	6.18918	6.45778	0.2686	0.00584087	0.539474	0.0110328	*
PDH	4.52732	4.8349	0.307585	0.00465898	0.552632	0.0110328	*
PSA	3.8587	3.9508	0.0920957	0.0947849	0.335526	0.123949
TCA	5.21878	5.44938	0.230603	0.00200357	0.598684	0.00681214	**
TNFA_NFKB	5.8984	6.05107	0.152663	0.0441232	0.401316	0.0625079
cSLP	4.0164	4.02431	0.00790443	0.908937	0.0263158	0.908937
mSLP	3.3876	3.34317	-0.0444298	0.682706	-0.0855263	0.725375
Tau_index	-0.406953	0.97611	1.38306	0.000105182	0.730263	0.0017881	**

## Sheet: Ctrl_vs_HighIL10_Gene
ENSG	GeneSymbol	Modules	Enzyme	Category	Mean_g1	Mean_g2	Delta	logFC	T_value	p_raw_limma	p_adj_limma	p_raw_wilcox	Cliff	Signif
ENSG00000027697	IFNGR1	IFNγ	Interferon-γ receptor 1	Chain-1 of receptor – constitutive expression	7.34411	8.23084	0.886731	0.886731	6.65986	8.42167e-08	1.41484e-05	3.30055e-08	0.947368	***
ENSG00000167863	ATP5PD	OXPHOS	ATP synthase peripheral stalk subunit D (ATP5H)	Complex V stator – frequently ↓	6.14014	7.36834	1.2282	1.2282	6.10851	4.62928e-07	3.8886e-05	2.95178e-05	0.776316	***
ENSG00000091140	DLD	TCA	Dihydrolipoamide dehydrogenase (E3)	Shared E3 for α-KGDH and PDH complexes	4.9044	6.14596	1.24156	1.24156	5.95091	7.54976e-07	4.22787e-05	5.60256e-06	0.828947	***
ENSG00000135766	EGLN1	HIF1A	Egl-9 family hypoxia-inducible factor 1 (PHD2)	Main oxygen sensor – hydroxylates & degrades HIF-α; often dysregulated in ASD	6.97528	7.73621	0.760937	0.760937	5.11611	1.00583e-05	0.000241399	3.57262e-05	0.769737	***
ENSG00000140374	ETFA	FAO	Electron Transfer Flavoprotein	Electron Transfer Flavoprotein	5.23753	6.06786	0.830326	0.830326	5.29009	5.87293e-06	0.000241399	4.31047e-05	0.763158	***
ENSG00000164919	COX6C	OXPHOS	Cytochrome c oxidase subunit 6C	Complex IV – ubiquitous isoform, often ↓	5.75944	7.44175	1.68232	1.68232	5.13536	9.47766e-06	0.000241399	0.000147313	0.717105	***
ENSG00000204370	SDHD	TCA	Succinate dehydrogenase complex subunit D	Complex II anchor	6.99856	7.5406	0.542047	0.542047	5.16322	8.69608e-06	0.000241399	2.43009e-05	0.782895	***
ENSG00000159399	HK2	Glycolysis	Hexokinase 2	1. Glucose → Glucose-6-phosphate (cancer isoform)	4.86046	5.65009	0.789633	0.789633	4.90114	1.95012e-05	0.000400459	1.62968e-05	0.796053	***
ENSG00000162645	GBP2	IFNγ	Guanylate-binding protein 2	Same family	6.91172	7.6932	0.781475	0.781475	4.87006	2.14532e-05	0.000400459	6.2143e-05	0.75	***
ENSG00000125538	IL1B	Acute_Inflammation	Interleukin-1β	Master alarm cytokine – ↑↑↑↑ in sepsis, almost undetectable in ASD	5.19077	6.08273	0.891967	0.891967	4.77641	2.85828e-05	0.000436537	6.2143e-05	0.75	***
ENSG00000164951	PDP1	PDH	Pyruvate dehydrogenase phosphatase catalytic subunit 1	Main mitochondrial activator (Ca²⁺-sensitive) – often ↓ in ASD (less de-repression)	5.22564	6.09264	0.867004	0.867004	4.78556	2.77933e-05	0.000436537	0.00012465	0.723684	***
ENSG00000100644	HIF1A	HIF1A	Hypoxia-inducible factor 1-alpha	Master regulator – protein stabilised/activated in many ASD brains despite normal or low mRNA	7.85001	8.39823	0.548221	0.548221	4.63251	4.434e-05	0.000620759	2.43009e-05	0.782895	***
ENSG00000177646	ACAD9	FAO	Acyl-CoA dehydrogenase family member 9	Long/Very Long-Chain Acyl-CoA Dehydrogenases	4.21652	3.77854	-0.437978	-0.437978	-4.58088	5.18741e-05	0.000670373	8.85158e-05	-0.736842	***
ENSG00000105639	JAK3	IL4_Th2	Janus kinase 3	Lymphocyte-specific – strongly associated with IL-4 pathway	6.8084	6.25128	-0.557116	-0.557116	-4.53891	5.89175e-05	0.00070701	1.32726e-05	-0.802632	***
ENSG00000170525	PFKFB3	HIF1A	6-phosphofructo-2-kinase/fructose-2,6-biphosphatase 3	Key glycolytic driver – brain isoform; highly sensitive to HIF activation but variable in ASD	5.37128	6.35989	0.988603	0.988603	4.40071	8.94439e-05	0.00100177	0.000147313	0.717105	**
ENSG00000205560	CPT1B	FAO	Carnitine palmitoyltransferase 1B	Carnitine Shuttle	4.40151	3.6077	-0.793802	-0.793802	-4.33661	0.000108446	0.00113869	0.000147313	-0.717105	**
ENSG00000143546	S100A8	Acute_Inflammation	S100 calcium-binding protein A8 (calprotectin subunit)	Best blood marker of bacterial inflammation – ↑↑↑↑ in sepsis, normal in ASD	9.43872	10.3223	0.883576	0.883576	4.28876	0.000125166	0.00123693	0.000592912	0.657895	**
ENSG00000111716	LDHB	cSLP	Lactate dehydrogenase B (H subunit)	Minor role in brain	7.72064	8.82543	1.10478	1.10478	4.15224	0.000187996	0.00175463	0.000442251	0.671053	**
ENSG00000125166	GOT2	mSLP	Aspartate aminotransferase, mitochondrial	Malate-aspartate shuttle + transamination to feed OAA/α-KG into TCA/mSLP	5.09269	4.616	-0.476684	-0.476684	-4.06497	0.000243377	0.00215196	0.000173649	-0.710526	**
ENSG00000127884	ECHS1	FAO	Enoyl-CoA Hydratase	Enoyl-CoA Hydratase	5.97865	5.59902	-0.379625	-0.379625	-3.96801	0.000323623	0.00271843	0.000512624	-0.664474	**
ENSG00000096968	JAK2	IFNγ	Janus kinase 2	Secondary kinase – constitutive	4.06696	4.98995	0.92299	0.92299	3.93796	0.000353358	0.00282686	0.00176359	0.605263	**
ENSG00000108515	ENO3	cSLP	Enolase 3 (beta, muscle)	Muscle-specific (low in brain)	2.51004	1.98312	-0.526916	-0.526916	-3.90997	0.000383433	0.00292803	0.000905782	-0.638158	**
ENSG00000213341	CHUK	TNFA_NFKB	Conserved helix-loop-helix ubiquitous kinase (IKKα)	IKK complex – activated in sepsis, quiescent in most ASD	4.09674	4.72025	0.62351	0.62351	3.88853	0.000408142	0.00298121	0.00415089	0.559211	**
ENSG00000004799	PDK4	PDH	Pyruvate dehydrogenase kinase isoform 4	Muscle/heart, starvation-induced – usually low/unchanged in brain/ASD	3.0963	4.51631	1.42002	1.42002	3.86096	0.000442205	0.00309543	0.00103895	0.631579	**
ENSG00000117054	ACADM	FAO	Medium-Chain Acyl-CoA Dehydrogenase	Medium/Short-Chain	4.7418	5.61192	0.870115	0.870115	3.81712	0.000502122	0.00323658	0.00176359	0.605263	**
ENSG00000122971	ACADS	FAO	Short-Chain Acyl-CoA Dehydrogenase	Medium/Short-Chain	4.395	3.92052	-0.474477	-0.474477	-3.81255	0.000508801	0.00323658	0.000512624	-0.664474	**
ENSG00000283447	NDUFS1	OXPHOS	NADH:ubiquinone oxidoreductase iron-sulfur protein 1	Complex I core subunit – one of the most common CI hits in ASD	4.08708	4.54608	0.459006	0.459006	3.8049	0.000520165	0.00323658	0.00103895	0.631579	**
ENSG00000136143	SUCLA2	TCA	Succinate-CoA ligase (ADP-forming) β subunit	Brain/abundant isoform – mutations cause severe mtDNA depletion + ASD	4.18143	4.8992	0.717766	0.717766	3.75826	0.000595052	0.00357031	0.00176359	0.605263	**
ENSG00000163220	S100A9	Acute_Inflammation	S100 calcium-binding protein A9 (calprotectin subunit)	Same as S100A8 – extremely high in sepsis plasma	9.4772	10.0004	0.523251	0.523251	3.72377	0.00065705	0.00380636	0.000326935	0.684211	**
ENSG00000243646	IL10RB	IL10	IL-10 receptor β (shared with IL-22/26/28)	Constitutive	5.88694	6.37579	0.488846	0.488846	3.70125	0.000700856	0.00392479	0.000326935	0.684211	**
ENSG00000152556	PFKM	cSLP	Phosphofructokinase muscle	Rate-limiting step	3.9149	3.42533	-0.489572	-0.489572	-3.68947	0.00072488	0.00392838	0.000512624	-0.664474	**
ENSG00000232810	TNF	TNFA_NFKB	Tumor necrosis factor (TNF-α)	Master cytokine – ↑↑↑↑ in sepsis, usually normal/low in ASD brain	5.17848	5.99775	0.819265	0.819265	3.64602	0.00082056	0.00430794	0.00176359	0.605263	**
ENSG00000117118	SDHB	TCA	Succinate dehydrogenase iron-sulfur subunit B	Complex II + TCA	5.11512	5.70019	0.585073	0.585073	3.61288	0.000901608	0.00459	0.000512624	0.664474	**
ENSG00000172340	SUCLG2	TCA	Succinate-CoA ligase (GDP/ADP-forming) β subunit	Determines GDP vs ADP specificity	5.01279	5.44744	0.434651	0.434651	3.58957	0.0009632	0.00475934	0.00200357	0.598684	**
ENSG00000184557	SOCS3	IL6_STAT3	Suppressor of cytokine signalling 3	Classic negative-feedback gene – ↑↑↑↑ in sepsis, low in ASD	3.86477	4.64382	0.77905	0.77905	3.55153	0.00107253	0.00514815	0.00200357	0.598684	**
ENSG00000134333	LDHA	cSLP	Lactate dehydrogenase A (M subunit)	Regenerates NAD⁺ in cytoplasm – critical for glycolysis	7.57883	7.98285	0.404029	0.404029	3.44641	0.0014402	0.00662933	0.0029064	0.578947	**
ENSG00000160712	IL6R	IL6_STAT3	Interleukin-6 receptor α	Membrane-bound receptor – moderate constitutive	7.50637	7.91617	0.409802	0.409802	3.44151	0.00146003	0.00662933	0.00103895	0.631579	**
ENSG00000136872	ALDOB	cSLP	Aldolase B (liver/kidney)	Low in brain	2.73265	3.33963	0.606974	0.606974	3.38489	0.00170866	0.00740396	0.002572	0.585526	**
ENSG00000172840	PDP2	PDH	Pyruvate dehydrogenase phosphatase catalytic subunit 2	Cytosolic, Ca²⁺-insensitive isoform – minor role in brain, usually unchanged	3.80798	3.47636	-0.331618	-0.331618	-3.38275	0.00171878	0.00740396	0.000592912	-0.657895	**
ENSG00000168291	PDHB	PDH	Pyruvate dehydrogenase E1 β subunit	Core catalytic subunit – frequently ↓ or mutated in ASD	5.61706	6.12303	0.505972	0.505972	3.35112	0.00187574	0.0078781	0.0029064	0.578947	**
ENSG00000167315	ACAA2	FAO	Acetyl-CoA acyltransferase 2	Acetyl-CoA acyltransferase 2	4.61629	4.92266	0.30637	0.30637	3.33813	0.00194403	0.00796579	0.00154947	0.611842	**
ENSG00000178537	SLC25A20	FAO	Carnitine/acylcarnitine translocase	Carnitine Shuttle	3.99355	4.47405	0.480505	0.480505	3.31398	0.00207745	0.00830981	0.0022721	0.592105	**
ENSG00000140740	UQCRC2	OXPHOS	Ubiquinol-cytochrome c reductase core protein 2	Complex III core – frequently reduced	6.72532	7.13045	0.40513	0.40513	3.29352	0.00219727	0.0085847	0.00327857	0.572368	**
ENSG00000129521	EGLN3	HIF1A	Egl-9 family hypoxia-inducible factor 3 (PHD3)	Brain-enriched prolyl hydroxylase – strongly induced by hypoxia	1.24691	1.69962	0.45271	0.45271	3.27748	0.0022958	0.00876577	0.00652432	0.532895	**
ENSG00000084754	HADHA	FAO	Trifunctional Enzyme Subunit Alpha	Trifunctional Protein	5.94542	6.33535	0.38993	0.38993	3.22557	0.00264433	0.00987218	0.00522072	0.546053	**
ENSG00000159128	IFNGR2	IFNγ	Interferon-γ receptor 2	Chain-2 – induced by IFN-γ	7.44181	7.89768	0.455872	0.455872	3.18305	0.00296676	0.0108351	0.000380675	0.677632	*
ENSG00000110090	CPT1A	FAO	Carnitine palmitoyltransferase 1A	Carnitine Shuttle	4.90434	5.48782	0.583479	0.583479	3.15335	0.00321373	0.0114874	0.00652432	0.532895	*
ENSG00000173039	RELA	TNFA_NFKB	RELA proto-oncogene, NF-κB subunit (p65)	Transcriptionally active subunit – strongly ↑ in sepsis, low in ASD	6.48182	6.19413	-0.287696	-0.287696	-3.11925	0.00352137	0.0123248	0.00327857	-0.572368	*
ENSG00000069399	BCL3	IL10	B-cell lymphoma 3-encoded protein	IL-10 → stabilises repressive p50/p50 NF-κB homodimers → blocks pro-inflammatory genes	6.2114	6.67537	0.463971	0.463971	3.08332	0.00387553	0.0132875	0.00465898	0.552632	*
ENSG00000171503	ETFDH	FAO	Electron Transfer Flavoprotein	Electron Transfer Flavoprotein	2.14847	2.70029	0.551818	0.551818	3.03229	0.00443686	0.0149078	0.0022721	0.592105	*
ENSG00000131143	COX4I1	OXPHOS	Cytochrome c oxidase subunit 4I1	Complex IV (most abundant isoform) – frequently ↓ in ASD	8.31308	8.6451	0.332024	0.332024	2.91721	0.00599639	0.0197528	0.00118931	0.625	*
ENSG00000131828	PDHA1	PDH	Pyruvate dehydrogenase E1 α subunit (somatic)	Core catalytic subunit – X-linked, most frequently mutated / ↓↓↓ in ASD	4.87692	5.22914	0.352216	0.352216	2.7666	0.00881925	0.028493	0.00154947	0.611842	*
ENSG00000124370	MCEE	PSA	Methylmalonyl-CoA epimerase	Isomerase	3.35815	3.78881	0.430659	0.430659	2.70227	0.0103673	0.0328623	0.0122746	0.493421	*
ENSG00000067992	PDK3	PDH	Pyruvate dehydrogenase kinase isoform 3	Brain-enriched – frequently ↑ in ASD (together with PDK1)	6.40734	6.10096	-0.306381	-0.306381	-2.60196	0.0132899	0.0413463	0.0219271	-0.453947	*
ENSG00000073756	PTGS2	Acute_Inflammation	Prostaglandin-endoperoxide synthase 2 (COX-2)	Inducible cyclooxygenase – prostaglandin storm in sepsis, low in ASD brain	4.44195	5.12301	0.681058	0.681058	2.58769	0.0137624	0.042038	0.0110885	0.5	*
ENSG00000102970	CCL17	IL4_Th2	C-C motif chemokine ligand 17 (TARC)	Classic Th2 chemokine – attracts CCR4+ Tregs & Th2 cells – ↑ in ASD with allergy/atopy	1.68603	1.24432	-0.441715	-0.441715	-2.57146	0.0143187	0.0429561	0.0199746	-0.460526	*
ENSG00000228987	HLA-DRA	IFNγ	Major histocompatibility complex, class II, DR alpha	MHC-II induction – ↑↑↑ in sepsis, low in resting ASD microglia/astrocytes	8.52617	9.00361	0.477441	0.477441	2.51978	0.0162302	0.0478364	0.0181713	0.467105	*
ENSG00000059804	SLC2A3	Glycolysis	Glucose transporter 3 (GLUT3)	Glucose uptake	7.34416	7.78522	0.441061	0.441061	2.50122	0.0169718	0.0491596	0.0240384	0.447368	*
ENSG00000111537	IFNG	IFNγ	Interferon-γ	Master type-1 cytokine – ↑↑↑ in viral/bacterial sepsis, usually low in ASD	1.65845	2.34149	0.683044	0.683044	2.49249	0.0173313	0.0493501	0.0240384	0.447368	*
ENSG00000110435	PDHX	PDH	Pyruvate dehydrogenase protein X component (E3BP)	Anchors E3 to complex – mutations cause severe PDH deficiency + autistic features	4.52291	4.90426	0.38135	0.38135	2.41113	0.0210306	0.0588857	0.0110885	0.5
ENSG00000137265	IRF4	IL4_Th2	Interferon regulatory factor 4	Co-operates with STAT6 for Th2 programme – frequently ↑ in ASD immune cells	6.23996	5.82398	-0.415984	-0.415984	-2.35821	0.0238073	0.0655678	0.0263182	-0.440789
ENSG00000014641	MDH1	TCA	Malate dehydrogenase 1 (cytosolic)	OAA ↔ malate (shuttle function, minor direct TCA)	6.24271	6.60339	0.360684	0.360684	2.34983	0.0242759	0.06578	0.0135681	0.486842
ENSG00000062485	CS	TCA	Citrate synthase	TCA entry: acetyl-CoA + OAA → citrate	6.44957	6.24321	-0.206357	-0.206357	-2.24686	0.0307559	0.0782876	0.0149766	-0.480263
ENSG00000067057	PFKP	Glycolysis	Phosphofructokinase-1, platelet subunit	3. Fructose-6-P → Fructose-1,6-BP (committed step)	5.21472	4.95	-0.264727	-0.264727	-2.24696	0.0307485	0.0782876	0.0263182	-0.440789
ENSG00000117394	SLC2A1	Glycolysis	Glucose transporter 1 (GLUT1)	Glucose uptake	5.13591	4.93532	-0.200592	-0.200592	-2.26705	0.0293747	0.0782876	0.0135681	-0.486842
ENSG00000179091	CYC1	OXPHOS	Cytochrome c1	Complex III – heme protein, ↓ in many cohorts	5.40442	5.15084	-0.253583	-0.253583	-2.25004	0.0305341	0.0782876	0.0478825	-0.394737
ENSG00000105679	GAPDHS	cSLP	Spermatogenic GAPDH (rarely expressed in brain)	Same as GAPDH (usually ignore in brain)	0.630653	-0.107687	-0.738339	-0.738339	-2.21648	0.0329428	0.0822337	0.0342713	-0.421053
ENSG00000166411	IDH3A	TCA	Isocitrate dehydrogenase 3 (NAD⁺) α subunit	Main TCA catalytic enzyme: isocitrate → α-ketoglutarate + NADH	3.56823	3.99853	0.430297	0.430297	2.21189	0.0332851	0.0822337	0.0406095	0.407895
ENSG00000131473	ACLY	TCA	ATP-citrate lyase	Citrate (mito → cyto) → acetyl-CoA + OAA (lipids, epigenetics)	6.09324	6.27235	0.179117	0.179117	2.18421	0.0354171	0.0850009	0.0199746	0.460526
ENSG00000169429	CXCL8	Acute_Inflammation	C-X-C motif chemokine ligand 8 (IL-8)	Strongest neutrophil chemoattractant – ↑↑↑↑↑ in sepsis, negligible in ASD	4.28354	5.19947	0.915933	0.915933	2.18899	0.0350404	0.0850009	0.0478825	0.394737
ENSG00000111674	ENO2	cSLP	Enolase 2 (neuron-specific, gamma)	Brain-specific enolase	2.90355	2.56191	-0.341638	-0.341638	-2.17367	0.0362598	0.0857978	0.0478825	-0.394737
ENSG00000105397	TYK2	IL6_STAT3	Tyrosine kinase 2	Minor role in IL-6 signalling – constitutive	5.6991	5.4436	-0.255505	-0.255505	-2.13744	0.0392953	0.091689	0.070786	-0.361842
ENSG00000169021	UQCRFS1	OXPHOS	Ubiquinol-cytochrome c reductase Rieske iron-sulfur	Complex III Rieske protein – often ↓	6.65036	6.8766	0.226243	0.226243	2.12008	0.0408286	0.0939616	0.0441232	0.401316
ENSG00000119689	DLST	TCA	Dihydrolipoamide S-succinyltransferase (E2)	Part of α-KGDH complex	3.88371	4.15924	0.275526	0.275526	2.03953	0.0486492	0.110447	0.20516	0.256579
ENSG00000125347	IRF1	IFNγ	Interferon regulatory factor 1	First-wave transcription factor – classic IFN-γ-induced gene	7.6236	7.84986	0.226264	0.226264	1.98857	0.054248	0.121515	0.0656164	0.368421
ENSG00000090339	ICAM1	Acute_Inflammation	Intercellular adhesion molecule 1	Endothelial activation & leukocyte adhesion – ↑↑↑ in sepsis, low in ASD	3.15383	3.3763	0.222474	0.222474	1.96987	0.0564393	0.12314	0.116619	0.315789
ENSG00000115415	STAT1	IFNγ	Signal transducer and activator of transcription 1	Principal transcription factor – strongly phosphorylated/up in active IFN-γ response	8.05683	8.41719	0.360358	0.360358	1.9736	0.055996	0.12314	0.0240384	0.447368
ENSG00000117228	GBP1	IFNγ	Guanylate-binding protein 1	Classic IFN-γ-inducible GTPase – ↑↑↑ in sepsis, very low in ASD	7.20584	7.74191	0.536073	0.536073	1.96135	0.0574629	0.123766	0.0287766	0.434211
ENSG00000110324	IL10RA	IL10	IL-10 receptor α	Constitutive + induced	6.96239	6.75135	-0.211047	-0.211047	-1.93644	0.060547	0.128276	0.0165083	-0.473684
ENSG00000167792	NDUFV1	OXPHOS	NADH:ubiquinone oxidoreductase flavoprotein 1	Complex I core subunit – frequently mutated/down in ASD	5.70723	5.48089	-0.226341	-0.226341	-1.93222	0.0610839	0.128276	0.0406095	-0.407895
ENSG00000077238	IL4R	IL4_Th2	Interleukin-4 receptor α (shared with IL-13)	Constitutive + induced in Th2-skewed states	7.05082	7.33169	0.280878	0.280878	1.84767	0.0727269	0.149001	0.101677	0.328947
ENSG00000166888	STAT6	IL4_Th2	Signal transducer and activator of transcription 6	Canonical IL-4 transcription factor – phosphorylated/up in Th2 conditions	7.86225	7.64662	-0.21563	-0.21563	-1.84885	0.0725513	0.149001	0.088262	-0.342105
ENSG00000169245	CXCL10	IFNγ	C-X-C motif chemokine ligand 10 (IP-10)	Same family – one of the best markers of active IFN-γ response	2.12246	2.95918	0.83672	0.83672	1.81226	0.0781376	0.158158	0.0762751	0.355263
ENSG00000152234	ATP5F1A	OXPHOS	ATP synthase F1 subunit alpha	Complex V catalytic core – almost always ↓ in ASD	8.27027	8.45273	0.182467	0.182467	1.7934	0.0811575	0.162315	0.0287766	0.434211
ENSG00000010256	UQCRC1	OXPHOS	Ubiquinol-cytochrome c reductase core protein 1	Complex III core – often ↓ in ASD	5.69968	5.50377	-0.195911	-0.195911	-1.75977	0.0867858	0.17153	0.0263182	-0.440789
ENSG00000143252	SDHC	TCA	Succinate dehydrogenase complex subunit C	Complex II anchor	6.50722	6.66008	0.152856	0.152856	1.71302	0.0951513	0.185877	0.070786	0.361842
ENSG00000162711	NLRP3	Acute_Inflammation	NLR family pyrin domain containing 3	Major inflammasome platform – strongly activated in sepsis, mostly quiescent in ASD	3.61296	3.87397	0.261009	0.261009	1.70478	0.0966918	0.186715	0.070786	0.361842
ENSG00000176171	BNIP3	HIF1A	BCL2/adenovirus E1B 19kDa interacting protein 3	Mitophagy & cell-death mediator under chronic hypoxia; ↑ in some ASD subgroups	4.30326	4.58562	0.282356	0.282356	1.68584	0.100315	0.191511	0.0762751	0.355263
ENSG00000102962	CCL22	IL4_Th2	C-C motif chemokine ligand 22 (MDC)	Same CCR4 axis – strongly induced by IL-4, ↑ in many ASD blood studies	2.98701	2.60061	-0.386398	-0.386398	-1.66342	0.104751	0.197732	0.101677	-0.328947
ENSG00000138413	IDH1	TCA	Isocitrate dehydrogenase 1 (cytosolic/NADP⁺)	Mainly NADPH production (minor TCA role in brain)	5.77732	5.98736	0.210039	0.210039	1.65258	0.106951	0.199642	0.0947849	0.335526
ENSG00000100412	ACO2	TCA	Aconitase 2 (mitochondrial)	Citrate ↔ cis-aconitate ↔ isocitrate	4.52773	4.68446	0.156727	0.156727	1.6292	0.11183	0.206455	0.193468	0.263158
ENSG00000136244	IL6	Acute_Inflammation	Interleukin-6	Acute-phase driver, fever, CRP induction – ↑↑↑↑ in sepsis, very low in ASD	1.16575	1.46351	0.297757	0.297757	1.61909	0.113994	0.208164	0.0820962	0.348684
ENSG00000081041	CXCL2	Acute_Inflammation	C-X-C motif chemokine ligand 2 (GRO-β)	Same family, same pattern	1.32167	1.75934	0.437662	0.437662	1.56737	0.125616	0.226919	0.124693	0.309211
ENSG00000168610	STAT3	IL6_STAT3	Signal transducer and activator of transcription 3	Principal transcription factor – massively phosphorylated/activated in sepsis, low in ASD	7.48962	7.71723	0.227614	0.227614	1.54865	0.130052	0.232434	0.217344	0.25
ENSG00000074800	ENO1	Glycolysis	Enolase 1	9. 2-Phosphoglycerate → Phosphoenolpyruvate	7.98111	8.10943	0.128328	0.128328	1.52997	0.134602	0.235554	0.161264	0.282895
ENSG00000160883	HK3	cSLP	Hexokinase 3	Minor in most tissues	5.58913	5.91477	0.325641	0.325641	1.53203	0.134096	0.235554	0.151458	0.289474
ENSG00000104365	IKBKB	TNFA_NFKB	Inhibitor of κB kinase β (IKKβ)	Main kinase that frees NF-κB – massively active in sepsis	5.81739	5.68469	-0.132704	-0.132704	-1.50142	0.141807	0.235876	0.151458	-0.289474
ENSG00000105953	OGDH	TCA	Oxoglutarate dehydrogenase (E1)	α-ketoglutarate → succinyl-CoA + NADH	3.89557	3.65799	-0.237581	-0.237581	-1.50506	0.140872	0.235876	0.193468	-0.263158
ENSG00000112715	VEGFA	HIF1A	Vascular endothelial growth factor A	Classic HIF target – neuroprotection/angiogenesis; variable in ASD but often ↑ at protein level	4.31717	4.01926	-0.297909	-0.297909	-1.52206	0.136568	0.235876	0.133183	-0.302632
ENSG00000150768	DLAT	PDH	Dihydrolipoamide S-acetyltransferase (E2)	Core lipoamide swinging arm – ↓ in many ASD cohorts	3.72914	3.92806	0.198917	0.198917	1.50777	0.140178	0.235876	0.108951	0.322368
ENSG00000288118	GLUD2	mSLP	Glutamate dehydrogenase 2 (brain/testis-specific)	Brain-evolved isoform, less sensitive to GTP inhibition – frequently altered in ASD	3.00344	3.28128	0.277834	0.277834	1.50299	0.141404	0.235876	0.20516	0.256579
ENSG00000163541	SUCLG1	TCA	Succinate-CoA ligase (GDP/ADP-forming) α subunit	Substrate-level phosphorylation (succinyl-CoA → succinate + GTP/ATP)	6.01892	6.16703	0.148112	0.148112	1.49441	0.143621	0.236552	0.18226	0.269737
ENSG00000163739	CXCL1	Acute_Inflammation	C-X-C motif chemokine ligand 1 (GRO-α)	Neutrophil recruitment – massive in sepsis, near-zero in ASD	3.68283	4.09841	0.415574	0.415574	1.48022	0.147354	0.240344	0.243208	0.236842
ENSG00000113520	IL4	IL4 Th2	Interleukin-4	Master Th2 cytokine – ↑ in many ASD children with atopy, GI issues, chronic LPS exposure	2.43936	2.17881	-0.260546	-0.260546	-1.4505	0.155417	0.251059	0.20516	-0.256579
ENSG00000172331	BPGM	cSLP	Bisphosphoglycerate mutase (2,3-BPG synthesis)	Modulates GAPDH/PGK step (mainly erythrocytes)	5.07014	5.27902	0.208879	0.208879	1.43889	0.15866	0.253856	0.285819	0.217105
ENSG00000138755	CXCL9	IFNγ	C-X-C motif chemokine ligand 9 (MIG)	Strongest IFN-γ-inducible chemokine – ↑↑↑↑ in sepsis, low/near-zero in most ASD	1.63065	1.43134	-0.199309	-0.199309	-1.33503	0.190093	0.298464	0.0762751	-0.355263
ENSG00000139180	NDUFA9	OXPHOS	NADH:ubiquinone oxidoreductase subunit A9	Complex I accessory – often ↓ in ASD brain cohorts	4.56164	4.74711	0.185477	0.185477	1.33798	0.189138	0.298464	0.161264	0.282895
ENSG00000156515	HK1	Glycolysis	Hexokinase 1	1. Glucose → Glucose-6-phosphate (rate-limiting)	6.76332	6.8739	0.110576	0.110576	1.28963	0.20525	0.319278	0.171528	0.276316
ENSG00000102144	PGK1	Glycolysis	Phosphoglycerate kinase 1	7. 1,3-BPG → 3-PG (substrate-level phosphorylation)	8.71813	8.80488	0.0867504	0.0867504	1.26864	0.21256	0.327615	0.101677	0.328947
ENSG00000143437	ARNT	HIF1A	Aryl hydrocarbon receptor nuclear translocator	HIF-1β – obligatory dimerisation partner	3.8526	4.00611	0.153516	0.153516	1.26138	0.215135	0.32857	0.271102	0.223684
ENSG00000173599	PC	TCA	Pyruvate carboxylase	Anaplerosis: pyruvate → oxaloacetate (critical in astrocytes)	0.235455	0.536234	0.300779	0.300779	1.21569	0.231869	0.350936	0.422052	0.164474
ENSG00000067225	PKM	Glycolysis	Pyruvate kinase M1/M2	10. PEP → Pyruvate (final rate-limiting step)	5.9307	6.09702	0.166325	0.166325	1.13837	0.262348	0.393522	0.441347	0.157895
ENSG00000134352	IL6ST	IL6_STAT3	Interleukin-6 signal transducer (gp130)	Shared co-receptor – strongly induced in sepsis	7.24132	7.42823	0.186908	0.186908	1.11078	0.27389	0.4072	0.151458	0.289474
ENSG00000185338	SOCS1	IL4_Th2	Suppressor of cytokine signalling 1	Negative feedback – ↑ in chronic IL-4/Th2 states	3.28487	3.06681	-0.218058	-0.218058	-1.08207	0.286283	0.421891	0.20516	-0.256579
ENSG00000109320	NFKB1	TNFA_NFKB	Nuclear factor NF-κB p105/p50 subunit	Core subunit – mild activation in some ASD, massive in sepsis	5.3846	5.52474	0.140138	0.140138	1.05339	0.299052	0.436876	0.658831	0.0921053
ENSG00000109107	ALDOC	cSLP	Aldolase C (brain-specific)	Predominant aldolase isoform in adult brain	4.38646	4.26387	-0.122585	-0.122585	-1.03518	0.307363	0.443549	0.367141	-0.184211
ENSG00000178741	COX5A	OXPHOS	Cytochrome c oxidase subunit 5A	Complex IV – ↓ in brain ASD studies	7.11035	7.22631	0.115964	0.115964	1.03185	0.3089	0.443549	0.0607537	0.375
ENSG00000262785	PKLR	cSLP	Pyruvate kinase liver/red blood cell	Direct ATP-producing enzyme (cSLP step 2)	2.7415	2.5562	-0.185299	-0.185299	-1.02492	0.312113	0.444364	0.20516	-0.256579
ENSG00000275302	CCL4	Acute_Inflammation	C-C motif chemokine ligand 4 (MIP-1β)	Same family, strong sepsis induction	5.08463	5.27811	0.193478	0.193478	0.996668	0.325455	0.459467	0.566859	0.118421
ENSG00000159199	ATP5MC1	OXPHOS	ATP synthase membrane subunit c isoform 1	Complex V ring – highly expressed, often ↓	5.15778	5.02693	-0.130853	-0.130853	-0.961613	0.34254	0.475593	0.422052	-0.164474
ENSG00000169248	CXCL11	IFNγ	C-X-C motif chemokine ligand 11 (I-TAC)	Same CXCR3-ligand family – same pattern	-0.179692	0.11478	0.294471	0.294471	0.962791	0.341957	0.475593	0.731376	0.0723684
ENSG00000067182	TNFRSF1A	TNFA_NFKB	TNF receptor superfamily member 1A (TNFR1)	Main signalling receptor – normal in ASD, strongly ↑ in sepsis	6.5188	6.63638	0.117582	0.117582	0.924591	0.361222	0.494768	0.116619	0.315789
ENSG00000135390	ATP5MC2	OXPHOS	ATP synthase membrane subunit c isoform 2	Complex V ring – brain isoform	6.61893	6.82257	0.203644	0.203644	0.922608	0.362241	0.494768	0.101677	0.328947
ENSG00000162692	VCAM1	Acute_Inflammation	Vascular cell adhesion molecule 1	Same endothelial activation pattern as ICAM1	0.638404	0.851702	0.213298	0.213298	0.909733	0.368903	0.499804	0.960905	0.0131579
ENSG00000138796	HADH	FAO	Hydroxyacyl-CoA Dehydrogenase	Hydroxyacyl-CoA Dehydrogenase	6.50719	6.4265	-0.0806844	-0.0806844	-0.887688	0.380493	0.507324	0.54484	-0.125
ENSG00000152256	PDK1	PDH	Pyruvate dehydrogenase kinase isoform 1	Main brain inhibitor – often strongly ↑↑ in ASD (extra braking of PDH)	5.52504	5.40185	-0.123189	-0.123189	-0.888734	0.379937	0.507324	0.384943	-0.177632
ENSG00000274221	CCL3	Acute_Inflammation	C-C motif chemokine ligand 3 (MIP-1α)	Macrophage inflammatory protein – ↑↑ in sepsis, low in ASD	2.26661	2.54989	0.283282	0.283282	0.864285	0.393048	0.519938	0.461123	0.151316
ENSG00000146085	MMUT	PSA	Methylmalonyl-CoA mutase	Isomerase	4.83363	4.93978	0.10615	0.10615	0.850677	0.400468	0.525614	0.124693	0.309211
ENSG00000115361	ACADL	FAO	Long-chain acyl-CoA dehydrogenase	Long/Very Long-Chain Acyl-CoA Dehydrogenases	0.0767599	0.186867	0.110107	0.110107	0.786793	0.436457	0.559731	0.349848	0.190789
ENSG00000141959	PFKL	cSLP	Phosphofructokinase liver	Rate-limiting step	4.86653	4.79679	-0.0697439	-0.0697439	-0.793998	0.432303	0.559731	0.349848	-0.190789
ENSG00000171552	BCL2L1	IL6_STAT3	BCL2-like 1 (Bcl-xL)	Anti-apoptotic STAT3 target – ↑ in sepsis (cell survival), low in ASD	6.501	6.33527	-0.165734	-0.165734	-0.787644	0.435965	0.559731	0.612101	-0.105263
ENSG00000101365	IDH3B	TCA	Isocitrate dehydrogenase 3 (NAD⁺) β subunit	Main TCA catalytic enzyme	5.49801	5.42868	-0.0693367	-0.0693367	-0.746437	0.460161	0.585659	0.502083	-0.138158
ENSG00000073578	SDHA	TCA	Succinate dehydrogenase flavoprotein subunit A	Complex II + TCA: succinate → fumarate + FADH₂	6.26893	6.22071	-0.0482112	-0.0482112	-0.733993	0.467619	0.590676	0.367141	-0.184211
ENSG00000005882	PDK2	PDH	Pyruvate dehydrogenase kinase isoform 2	Broadly expressed inhibitor – mild-to-moderate ↑ in some ASD subgroups	2.46484	2.5764	0.111561	0.111561	0.713835	0.479847	0.601195	0.589285	0.111842
ENSG00000143384	MCL1	IL6_STAT3	Myeloid cell leukaemia 1	Another anti-apoptotic STAT3 target – ↑↑ in sepsis, low in ASD	9.26098	9.31045	0.04947	0.04947	0.708516	0.483103	0.601195	0.566859	0.118421
ENSG00000146701	MDH2	TCA	Malate dehydrogenase 2 (mitochondrial)	Malate → OAA + NADH (core TCA step)	7.00276	6.95119	-0.0515754	-0.0515754	-0.682808	0.499018	0.616434	0.461123	-0.151316
ENSG00000138029	HADHB	FAO	Trifunctional Enzyme Subunit Beta	Trifunctional Protein	7.13436	7.1868	0.0524331	0.0524331	0.640677	0.525715	0.644673	0.589285	0.111842
ENSG00000111669	TPI1	Glycolysis	Triosephosphate isomerase	5. DHAP ↔ Glyceraldehyde-3-P	7.21461	7.15304	-0.0615679	-0.0615679	-0.622248	0.537628	0.645663	0.422052	-0.164474
ENSG00000115009	CCL20	IL6_STAT3	C-C motif chemokine ligand 20 (MIP-3α)	Strong STAT3 target – ↑↑ in sepsis, very low in ASD	-1.42725	-1.22929	0.197961	0.197961	0.619721	0.539273	0.645663	0.481372	0.144737
ENSG00000116016	EPAS1	HIF1A	Endothelial PAS domain protein 1 (HIF-2α)	HIF-2α – important in neural stem cells & astrocytes; altered in some ASD subgroups	3.1149	3.02475	-0.0901536	-0.0901536	-0.612538	0.543961	0.645663	0.523243	-0.131579
ENSG00000118503	TNFAIP3	TNFA_NFKB	TNF-α-induced protein 3 (A20)	Major negative feedback – often ↓/mutated in autoimmune, normal in ASD	6.27289	6.19725	-0.0756391	-0.0756391	-0.615602	0.541958	0.645663	0.612101	-0.105263
ENSG00000158864	NDUFS2	OXPHOS	NADH:ubiquinone oxidoreductase iron-sulfur protein 2	Complex I core – pathogenic variants common in mitochondrial ASD	5.81378	5.86415	0.0503722	0.0503722	0.609822	0.545739	0.645663	0.781122	0.0592105
ENSG00000091483	FH	TCA	Fumarate hydratase	Fumarate → malate	5.47057	5.41596	-0.0546144	-0.0546144	-0.588309	0.55993	0.65782	0.523243	-0.131579
ENSG00000114054	PCCB	PSA	Propionyl-CoA carboxylase subunit beta	Ligase	3.8793	3.82188	-0.057418	-0.057418	-0.556053	0.581551	0.669182	0.589285	-0.111842
ENSG00000162434	JAK1	IFNγ	Janus kinase 1	Main signalling kinase – constitutive	8.38143	8.42474	0.0433036	0.0433036	0.558759	0.579722	0.669182	0.857345	0.0394737
ENSG00000206240	HLA-DRB1	IFNγ	Major histocompatibility complex, class II, DR beta 1	Same MHC-II – strong IFN-γ target	8.80267	8.87903	0.0763575	0.0763575	0.563015	0.57685	0.669182	0.658831	0.0921053
ENSG00000175198	PCCA	PSA	Propionyl-CoA carboxylase subunit alpha	Ligase	3.36374	3.25274	-0.111008	-0.111008	-0.538178	0.593705	0.67852	0.612101	-0.105263
ENSG00000148672	GLUD1	mSLP	Glutamate dehydrogenase 1 (ubiquitous)	Glutamate → α-ketoglutarate + NADH/NADPH – major neuronal anaplerosis & reducing power	4.57498	4.66652	0.0915396	0.0915396	0.52597	0.602075	0.683436	0.589285	0.111842
ENSG00000157184	CPT2	FAO	Carnitine palmitoyltransferase 2	Carnitine Shuttle	3.936	4.00398	0.0679792	0.0679792	0.481031	0.633352	0.714115	0.171528	0.276316
ENSG00000163734	CXCL3	Acute_Inflammation	C-X-C motif chemokine ligand 3 (GRO-γ)	Same family, same pattern	-0.808248	-0.660936	0.147312	0.147312	0.461373	0.647255	0.720125	0.806341	0.0526316
ENSG00000166123	GPT2	mSLP	Alanine aminotransferase 2, mitochondrial	Alanine ↔ pyruvate + glutamate ↔ α-KG – important for neuronal amino-acid shuttling & energy	0.879299	0.808889	-0.0704093	-0.0704093	-0.46176	0.646981	0.720125	0.960905	-0.0131579
ENSG00000107485	GATA3	IL4_Th2	GATA binding protein 3	Master regulator of Th2 differentiation – frequently ↑ in ASD peripheral blood	6.16802	6.12924	-0.0387766	-0.0387766	-0.434079	0.666774	0.732143	0.781122	-0.0592105
ENSG00000170950	PGK2	cSLP	Phosphoglycerate kinase 2 (testis-specific)	Direct ATP-producing enzyme (cSLP step 1)	1.56822	1.49477	-0.0734545	-0.0734545	-0.439321	0.663007	0.732143	0.731376	-0.0723684
ENSG00000234745	HLA-B	IFNγ	Major histocompatibility complex, class I, B	MHC-I induction – ↑ in active IFN-γ states	9.93641	9.96801	0.0316008	0.0316008	0.401055	0.690707	0.753498	0.88308	-0.0328947
ENSG00000110955	ATP5F1B	OXPHOS	ATP synthase F1 subunit beta	Complex V catalytic core – strongly ↓ in almost every ASD cohort	7.00747	7.04091	0.0334395	0.0334395	0.343671	0.733056	0.794538	0.481372	0.144737
ENSG00000182054	IDH2	TCA	Isocitrate dehydrogenase 2 (mitochondrial/NADP⁺)	Reductive carboxylation + NADPH (important in ASD mitochondria)	5.6436	5.67559	0.0319929	0.0319929	0.230655	0.818865	0.881854	0.908937	0.0263158
ENSG00000067829	IDH3G	TCA	Isocitrate dehydrogenase 3 (NAD⁺) γ subunit	Main TCA catalytic enzyme	5.51727	5.49097	-0.0262963	-0.0262963	-0.204389	0.839179	0.897975	0.481372	-0.144737
ENSG00000149925	ALDOA	Glycolysis	Fructose-bisphosphate aldolase A	4. Fructose-1,6-BP → DHAP + GAP	8.39418	8.42344	0.0292628	0.0292628	0.190666	0.849839	0.901806	0.612101	0.105263
ENSG00000282019	GPI	Glycolysis	Glucose-6-phosphate isomerase	2. Glucose-6-P → Fructose-6-P	5.66464	5.64043	-0.024216	-0.024216	-0.185968	0.853495	0.901806	0.658831	-0.0921053
ENSG00000105379	ETFB	FAO	Electron Transfer Flavoprotein	Electron Transfer Flavoprotein	4.17966	4.19783	0.0181768	0.0181768	0.165853	0.869183	0.907511	0.566859	0.118421
ENSG00000162654	GBP4	IFNγ	Guanylate-binding protein 4	Same family	4.2461	4.20699	-0.0391068	-0.0391068	-0.165194	0.869698	0.907511	0.986964	-0.00657895
ENSG00000108691	CCL2	Acute_Inflammation	C-C motif chemokine ligand 2 (MCP-1)	Monocyte/macrophage recruitment – ↑↑↑ in sepsis, low/variable in ASD	-1.23341	-1.12983	0.103571	0.103571	0.155217	0.877501	0.910001	0.0762751	-0.355263
ENSG00000100906	NFKBIA	TNFA_NFKB	NF-κB inhibitor alpha (IκBα)	Rapidly degraded in sepsis → NF-κB release; stable in ASD	7.43651	7.45336	0.0168465	0.0168465	0.129453	0.897707	0.91316	0.658831	0.0921053
ENSG00000136634	IL10	IL10	Interleukin-10	Master anti-inflammatory cytokine – chronically ↑ in many ASD children (blood & brain)	0.585538	0.611404	0.0258662	0.0258662	0.123623	0.902289	0.91316	0.857345	0.0394737
ENSG00000171314	PGAM1	Glycolysis	Phosphoglycerate mutase 1	8. 3-Phosphoglycerate → 2-Phosphoglycerate	8.21346	8.22279	0.00932742	0.00932742	0.128479	0.898472	0.91316	0.566859	0.118421
ENSG00000274233	CCL5	Acute_Inflammation	C-C motif chemokine ligand 5 (RANTES)	T-cell/eosinophil recruitment – ↑ in sepsis, variable in ASD	7.93109	7.95251	0.0214218	0.0214218	0.132891	0.895006	0.91316	0.756126	0.0657895
ENSG00000111640	GAPDH	Glycolysis	Glyceraldehyde-3-phosphate dehydrogenase	6. GAP → 1,3-Bisphosphoglycerate (NAD⁺ → NADH)	9.28807	9.29671	0.00863186	0.00863186	0.107468	0.915003	0.920482	0.781122	-0.0592105
ENSG00000072778	ACADVL	FAO	Very long-chain acyl-CoA dehydrogenase	Long/Very Long-Chain Acyl-CoA Dehydrogenases	5.48015	5.47447	-0.00568172	-0.00568172	-0.0510253	0.959582	0.959582	0.523243	-0.131579

## Sheet: Sample_TauAxis
Sample	Group	ImmuneState	Acute_Inflammation	FAO	Glycolysis	HIF1A	IFNγ	IL10	IL4 Th2	IL4_Th2	IL6_STAT3	OXPHOS	PDH	PSA	TCA	TNFA_NFKB	cSLP	mSLP	tau_raw	tau_z
GSM650512	ASD	ASD_High_IL10	4.34813	4.87119	7.25712	5.16354	6.59535	5.41919	1.81638	4.95664	5.65068	6.75029	4.97714	4.2771	5.78327	6.0211	4.14773	3.34638	81.3812	2.134
GSM650517	ASD	ASD_Low_IL10	4.22521	4.16932	6.8231	4.67628	6.0169	4.07345	1.93422	5.14629	6.00475	6.00044	4.35852	3.51716	4.98292	5.95296	4.29818	2.69263	74.8723	-1.87307
GSM650522	ASD	ASD_High_IL10	5.0953	4.60628	6.8881	5.09848	6.23085	4.85874	2.08543	4.78696	6.17682	6.48069	4.83539	4.00475	5.41186	5.99755	3.73749	3.18866	79.4833	0.96561
GSM650534	ASD	ASD_Low_IL10	4.26337	4.62559	7.13867	4.53813	6.00614	4.68789	1.5364	4.86944	5.81134	6.56849	4.62887	3.97956	5.40774	5.93615	4.01684	2.94496	76.9596	-0.588091
GSM650543	ASD	ASD_Low_IL10	3.83505	4.76738	7.22524	4.76013	6.08216	4.63792	0.427272	5.11847	5.66784	6.79736	4.7182	4.05153	5.54832	6.21374	4.20852	3.43752	77.4966	-0.257469
GSM650546	ASD	ASD_High_IL10	4.13863	4.80519	7.11424	5.37131	6.40757	5.51768	2.36893	5.10916	6.29022	6.57427	5.01065	4.09475	5.46097	6.25404	4.02424	3.45612	81.9979	2.51368
GSM650550	ASD	ASD_High_IL10	4.05982	4.63235	7.0826	4.41883	6.16244	4.8586	1.89599	5.1721	6.14728	6.41958	4.50219	2.79586	5.23757	5.68307	4.20021	2.5767	75.8452	-1.27415
GSM650551	ASD	ASD_Low_IL10	4.16935	4.71215	6.77418	5.12246	6.04275	4.47607	2.33411	4.80107	5.8642	6.44002	4.98964	4.09857	5.26532	5.84406	4.00181	3.30106	78.2368	0.198219
GSM650553	ASD	ASD_High_IL10	4.64662	4.7891	7.1576	4.77565	7.38629	5.09135	1.98073	5.1275	5.96983	6.64105	4.74693	3.82408	5.64689	6.44178	4.0193	3.23976	81.4845	2.19756
GSM650554	ASD	ASD_Low_IL10	4.08726	4.4784	7.07385	4.66115	5.91981	4.41975	2.33305	4.93828	5.80502	6.52141	4.54854	3.69653	5.33656	6.04787	4.14396	3.11979	77.1312	-0.482415
GSM650555	ASD	ASD_High_IL10	4.16635	4.76208	7.01687	5.1493	6.15409	5.18055	1.35016	4.80021	5.7745	6.59571	4.85157	4.25947	5.61436	5.85553	3.78404	3.43374	78.7485	0.513243
GSM650557	ASD	ASD_High_IL10	4.06571	4.73509	6.93391	4.89343	5.913	4.86066	2.25827	4.86704	5.90556	6.48132	4.90364	4.0246	5.43277	6.05221	3.87135	3.33402	78.5326	0.380289
GSM650562	ASD	ASD_Low_IL10	3.90186	4.45716	7.09104	4.67609	5.905	4.6576	1.4656	4.87714	5.91601	6.39182	4.57807	3.72464	5.26872	6.0308	4.18245	3.08395	76.208	-1.05082
GSM650572	ASD	ASD_High_IL10	3.54706	4.79221	6.87572	5.27555	5.9503	5.00912	2.24603	4.97326	6.12158	5.96777	5.11905	4.1316	5.38342	6.19095	4.15121	3.27168	79.0065	0.672054
GSM650578	ASD	ASD_Low_IL10	3.62939	4.69355	7.13326	4.369	5.99719	3.92687	0.124013	5.06229	5.73932	6.94205	4.48589	4.05379	5.69758	6.05903	3.97359	3.4246	75.3114	-1.60276
GSM650580	ASD	ASD_Low_IL10	3.83453	4.74974	7.17925	4.5026	6.54042	4.51157	2.69688	5.168	5.86948	6.95051	4.85689	3.84388	5.59608	6.32487	3.78889	3.30813	79.7217	1.11237
GSM650513	ASD	ASD_Low_IL10	3.91512	4.76326	6.92008	4.55655	6.12247	4.4952	2.35912	4.82029	5.33533	6.65143	4.92014	3.93918	5.53367	5.93077	3.9338	3.54111	77.7375	-0.109171
GSM650520	ASD	ASD_Low_IL10	4.01103	4.69499	7.1638	4.48923	6.00847	4.36962	1.24128	5.22031	5.90169	6.51614	4.40661	3.60654	5.38683	6.00449	4.36814	3.52483	76.914	-0.616165
GSM650527	ASD	ASD_Low_IL10	3.8355	4.64203	6.83135	4.88588	6.10614	4.58766	3.1318	4.78682	5.7332	6.63838	4.94076	4.21757	5.47118	6.03454	4.01603	2.93597	78.7948	0.541715
GSM650529	ASD	ASD_High_IL10	4.09932	4.68221	7.08982	4.80669	6.29564	5.0905	2.47041	4.73524	5.80603	6.4772	4.95413	3.94783	5.46016	5.82575	4.10872	3.48839	79.3381	0.876165
GSM650531	ASD	ASD_Low_IL10	3.89532	4.44041	7.03514	5.06532	5.87617	4.67704	2.03972	5.2126	5.94775	5.92255	4.57811	4.01377	5.23259	5.91811	4.07092	3.51661	77.4421	-0.291025
GSM650538	ASD	ASD_High_IL10	4.36329	4.57212	7.04934	5.04986	5.96815	5.02033	3.12843	5.05161	5.9959	6.41368	4.64632	4.02364	5.33838	5.93119	4.14841	3.50349	80.2041	1.40936
GSM650540	ASD	ASD_High_IL10	3.8298	4.69523	7.38053	4.6406	6.16279	4.93522	1.71747	5.14644	5.96051	6.7442	4.70226	3.77336	5.56785	6.23425	4.27422	3.25156	79.0163	0.678069
GSM650542	ASD	ASD_Low_IL10	4.12325	4.46958	6.77503	4.96284	6.1851	4.53769	2.54435	5.06751	5.7399	6.06413	4.64641	3.63126	5.12394	5.77934	4.24756	3.08711	76.985	-0.572441
GSM650544	ASD	ASD_Low_IL10	4.04375	4.53143	7.10573	5.0152	6.13359	4.71584	1.98525	5.0353	5.70369	6.18062	4.82849	3.9914	5.24096	6.00694	4.13836	3.47236	78.1289	0.131784
GSM650548	ASD	ASD_High_IL10	4.06985	4.5724	7.01439	4.92804	6.07299	5.08481	2.15472	4.99502	5.69991	6.44426	4.63293	3.91149	5.36852	5.86045	3.97706	3.1921	77.9789	0.0394562
GSM650552	ASD	ASD_High_IL10	3.88621	4.77682	7.28407	5.29531	6.3318	5.52239	1.81576	5.3104	6.33262	6.11346	4.91892	3.87736	5.25489	6.24318	4.10798	3.57074	80.6419	1.67885
GSM650558	ASD	ASD_High_IL10	3.84441	4.71668	7.02962	4.71217	6.10687	4.98263	2.05442	5.07131	5.67286	6.68276	4.61262	4.42319	5.41816	6.23363	3.91556	3.3789	78.8558	0.579257
GSM650560	ASD	ASD_High_IL10	3.70938	4.618	6.92681	4.92679	6.23669	4.94876	2.99755	4.86686	5.52022	6.68678	4.92946	4.02384	5.54894	5.97257	4.03571	3.69465	79.643	1.06389
GSM650567	ASD	ASD_Low_IL10	3.43639	4.86444	7.01063	4.57795	5.89621	4.69736	1.86338	5.0879	5.5751	6.60445	5.16558	4.30031	5.61876	5.90817	3.72733	3.88172	78.2157	0.18519
GSM650569	ASD	ASD_High_IL10	4.27105	4.65043	7.05896	5.15385	6.17499	5.27508	2.52036	5.21937	6.10642	5.85153	5.01521	3.81988	5.26208	6.01981	3.88567	3.56386	79.8485	1.19044
GSM650575	ASD	ASD_Low_IL10	3.43883	4.91333	7.25271	4.60672	5.64493	4.6397	1.08224	5.44382	5.55029	6.5261	4.70964	4.09153	5.38484	6.19944	3.7456	3.36921	76.5989	-0.810123
GSM650603	Control	Control	3.86285	4.63127	7.00605	4.75494	5.62077	4.95045	1.99581	5.39171	6.05785	5.96823	4.61372	3.76381	5.02568	5.8598	4.1261	3.01612	76.6452	-0.781658
GSM650604	Control	Control	3.51709	4.61181	7.09991	4.8294	5.5245	4.57602	1.91869	5.25858	5.8738	6.18577	4.64273	3.82712	5.23268	5.77623	4.15472	3.55294	76.582	-0.820555
GSM650606	Control	Control	3.51849	4.87565	6.63114	4.85982	5.74546	4.60148	2.28189	5.08343	5.34243	6.47398	5.11849	4.43334	5.53147	6.02025	3.9165	3.30186	77.7357	-0.110306
GSM650607	Control	Control	4.41597	4.53901	6.81694	5.09519	6.17362	5.07088	3.4492	4.97612	5.66988	5.96194	4.71963	3.85199	5.10809	5.89329	4.12431	3.02214	78.8882	0.599226
GSM650614	Control	Control	3.62524	4.41807	7.04308	4.61918	5.66557	4.60286	3.90443	5.36992	6.10767	5.95348	4.49297	3.71892	5.09416	5.71877	4.04575	3.4123	77.7924	-0.0753912
GSM650615	Control	Control	3.61239	4.592	6.95139	4.40284	5.40255	4.75745	2.39349	5.5479	5.96283	6.01911	4.11804	3.64678	4.97507	6.00339	4.19725	3.25292	75.8354	-1.28019
GSM650617	Control	Control	3.77085	4.41433	6.715	4.6943	5.4794	4.77436	2.87393	5.07005	5.32717	6.08931	4.52458	3.78977	4.99487	5.85043	4.21323	2.81414	75.3957	-1.55086
GSM650618	Control	Control	3.71754	4.79524	7.0203	4.57464	6.70101	5.44618	2.0032	4.99292	5.57192	6.6945	4.98757	4.01439	5.57812	6.13033	3.77811	3.50138	79.5073	0.980385
GSM650619	Control	Control	3.34596	4.20354	6.8277	4.11256	5.64722	4.76904	3.34185	5.3837	5.68818	6.07751	3.84782	3.33282	4.90566	5.47804	4.09383	3.03855	74.094	-2.35226
GSM650621	Control	Control	3.98215	4.59243	6.77444	4.56275	6.61857	4.78683	2.71332	5.3524	5.62196	6.24735	4.79277	3.99825	5.22174	5.86531	4.126	3.34422	78.6005	0.422096
GSM650632	Control	Control	3.75008	4.60329	6.89179	4.75194	6.28581	4.6506	2.03536	5.13481	5.66452	6.54124	4.82619	4.2176	5.51411	5.87284	4.00117	4.08008	78.8214	0.558111
GSM650633	Control	Control	3.64517	4.5283	7.2045	4.69241	5.93251	5.31237	1.82747	5.38696	6.15216	6.08289	4.19193	3.70863	5.25523	6.02186	3.987	3.34294	77.2723	-0.395565
GSM650640	Control	Control	4.03261	4.7051	7.15683	4.9436	6.05713	5.14939	2.24114	4.9351	5.87885	6.4078	4.98201	4.02488	5.48574	6.10687	3.92352	3.60254	79.6331	1.05781
GSM650642	Control	Control	3.73752	4.45897	7.01079	4.83573	6.32396	5.05051	2.48063	5.40035	5.8631	5.79521	4.339	3.63486	5.15905	6.03735	3.8325	3.34824	77.3078	-0.373736
GSM650644	Control	Control	3.71925	4.52098	6.96899	4.65524	5.73781	5.0749	2.1159	5.38668	5.71626	5.92342	4.36315	3.67649	5.19681	5.82092	3.7848	3.63036	76.2919	-0.999111
GSM650647	Control	Control	3.4609	4.86064	7.09484	4.23818	5.7293	4.77181	1.51628	5.15259	5.59042	6.5233	4.67727	4.21255	5.53288	5.8973	3.88436	3.67769	76.8203	-0.673843
GSM650649	Control	Control	4.33577	4.52308	7.24102	4.73676	5.58355	5.1604	2.13152	5.2317	6.42753	5.88043	4.26267	3.54728	4.89943	6.17352	4.02211	2.84326	77	-0.563213
GSM650651	Control	Control	3.41563	4.56598	7.03793	4.32168	5.72092	4.74378	2.69613	5.42808	5.63977	6.29975	4.23234	3.86804	5.25574	5.67533	4.03529	3.82346	76.7598	-0.711067
GSM650653	Control	Control	3.36692	4.61743	7.1032	4.26845	5.40873	5.07046	2.42763	5.47447	5.41647	6.46929	4.28614	4.04786	5.19025	5.86783	4.06512	3.75929	76.8395	-0.661994
